# Supplementary material
Source: publisher figshare collection journal article supplement (https://gsajournals.figshare.com/ndownloader/files/22800449)
Supplement: Supplementary file 1 [file 22800449]

## Sheet: Table S1
Table S1: Primer set used for qPCR analysis
Gene	Forward primer	Reverse primer
Cst3	CGCTCCTTGCTGTTCCTGCT	TGCCCTTGTTGTACTCGCTCAC
GAPDH	AGGTCGGTGTGAACGGATTTG	TGTAGACCATGTAGTTGAGGTCA
Ifitm3	TCATCATTGTTCTTAACGCTCA	CGGAAGTCGGAATCCTCTAT
Irf2	GCAAGCCGGGGACTAACTTT	CGGCATGGTACCCTCTCAAT
Ifi35	AGGGCCTGGCTATCTTCACT	AGGTTGGCACTTTGACCGTT
Samhd1	CTGGTGCGAGCACTTGCCGA	TGGGCGAGCCCGTGGGATAA
Psmb8	CCACTGCAGGGAGTTACATTAG	GTAAAGTCCTGGTCCCTTCTTG
Stat1	ATGACTTTAAATGCAAAACCTCTCA	GCAGCAGCTGTTCCTGTTTT
Stat2	GGTGGAAAACGGGTCCTTGA	TGCGCCATTTGGACTCTTCT
Ifit3	CTGAACTGCTCAGCCCACA	TCAGCTTGCCCTAAGCACTC
Irf9	TGAGGCCACCATTAGAGAGG	CTGTGCACCTGGGTCTTACC
Sp100	GGGCGGTTATTCACTCCCAT	GAAGCTGTTGGCCTCAGACA

## Sheet: Table S2
Table S2: Distribution of the 8 founder haplotype as a homozygous or heterozygous state among the study mouse population
DO progenitors	Homozygous	Heterozygous	Allele frequency
AJ	10 (8.33%)	26 (21.67%)	0.1917
B6	4 (3.33%)	55 (45.83%)	0.2625
129	5 (4.17%)	34 (28.33%)	0.1834
NOD	2 (1.67%)	14 (11.67%)	0.0751
NZO	1 (0.83%)	16 (13.33%)	0.0751
CAST	0 (0.00%)	4 (3.33%)	0.0167
PWK	1 (0.83%)	21 (17.50%)	0.0958
WSB	1 (0.83%)	22 (18.33%)	0.1
Allele frequency was calculated by 1*homozygous% + 0.5* heterozygous%

## Sheet: Table S3
Table S3: List of genes located at plasma cystatin C (CysC) QTL on Chromosome 2 and their correlation with plasma CysC concentration
MGI ID	Gene symbol	Full name	ENTREZID	Gene type	Gene position			eQTL			LOD	eQTL type	Expressed in kidney#	Correlation with CysC
					start (Mbp)	stop (Mbp)	strand	SNP ID	Chromosome	Position (Mb)				r	p	adj.p
MGI:5622842	Gm39957	predicted gene, 2c 39957	105244323	lncRNA gene	148.376	148.392	-
MGI:105372	Sstr4	somatostatin receptor 4	20608	protein coding gene	148.395	148.397	+							-0.00384972	0.972106	0.988294
MGI:98736	Thbd	thrombomodulin	21824	protein coding gene	148.404	148.408	-							0.230623	0.0337144	0.149569
MGI:3651533	Gm14119	predicted gene 14119	6610488	pseudogene	148.419	148.419	-
MGI:1921833	4833411I10Rik	RIKEN cDNA 4833411I10 gene	74583	unclassified gene	148.428	148.431	NA
MGI:106664	Cd93	CD93 antigen	17064	protein coding gene	148.437	148.444	-							0.22618	0.0373922	0.149569
MGI:3651530	Gm14120	predicted gene 14120	6610484	lincRNA gene	148.469	148.479	+
MGI:5826407	Gm46770	predicted gene, 2c 46770	108168804	lincRNA gene	148.521	148.562	-
MGI:5455643	Gm25866	predicted gene, 2c 25866	115486157	snoRNA gene	148.625	148.625	+
MGI:1929619	Nxt1	NTF2-related export protein 1	56488	protein coding gene	148.673	148.676	+							-0.0421266	0.701862	0.988294
MGI:1921783	Gzf1	GDNF-inducible zinc finger protein 1	74533	protein coding gene	148.679	148.693	+							-0.199905	0.0666091	0.213149
MGI:5826408	Gm46771	predicted gene, 2c 46771	108168805	lincRNA gene	148.68	148.681	-
MGI:104562	Napb	N-ethylmaleimide sensitive fusion protein attachment protein beta	17957	protein coding gene	148.694	148.732	-							0.0695088	0.527311	0.844378
MGI:2652834	Cstl1	cystatin-like 1	228756	protein coding gene	148.75	148.755	+							-0.0760955	0.488823	0.844378
MGI:1925490	Cst11	cystatin 11	78240	protein coding gene	148.769	148.771	-							0.00161536	0.988294	0.988294
MGI:1925859	8030411F24Rik	RIKEN cDNA 8030411F24 gene	78609	protein coding gene	148.782	148.786	+							-0.0245534	0.823494	0.988294
MGI:1916612	Cst12	cystatin 12	69362	protein coding gene	148.789	148.794	+							-0.0177613	0.871827	0.988294
MGI:107161	Cst8	cystatin 8 (cystatin-related epididymal spermatogenic)	13012	protein coding gene	148.799	148.806	+						Yes	-0.13709	0.210895	0.562388
MGI:1916544	Cst13	cystatin 13	69294	protein coding gene	148.82	148.83	+							-0.273064	0.011455	0.0916402
MGI:1340053	Cst9	cystatin 9	13013	protein coding gene	148.835	148.839	+						Yes	0.0694374	0.527736	0.844378
MGI:1924955	9230104L09Rik	RIKEN cDNA 9230104L09 gene	77705	protein coding gene	148.845	148.865	-							0.0298754	0.786068	0.988294
MGI:102519	Cst3	cystatin C	13010	protein coding gene	148.872	148.876	-	JAX00101452	chr2	148.697	15.8776	Cis	Yes	0.516838	4.11 x 10-7	6.5 x 10-6
MGI:5611449	Gm38221	predicted gene, 2c 38221	--	unclassified gene	148.89	148.89	-
MGI:3651572	Gm14129	predicted gene 14129	408189	pseudogene	148.928	148.932	-
MGI:2686176	Gm1330	predicted gene 1330	383753	protein coding gene	148.99	149.003	-
MGI:3643867	Gm9425	predicted gene 9425	668921	pseudogene	149.015	149.016	+
MGI:3641996	Gm10750	predicted gene 10750	100038377	protein coding gene	149.016	149.017	-
MGI:3649300	Gm14135	predicted gene 14135	433483	lincRNA gene	149.257	149.262	+
MGI:3652226	Gm14132	predicted gene 14132	383754	pseudogene	149.333	149.335	-
MGI:3652215	Gm14131	predicted gene 14131	241715	pseudogene	149.357	149.357	+
MGI:1930004	Cst10	cystatin 10 (chondrocytes)	58214	protein coding gene	149.405	149.41	+							-0.107738	0.326374	0.745997
MGI:5454328	Gm24551	predicted gene, 2c 24551	6605659	snoRNA gene	149.566	149.566	-
# Gene annotation for tissue-specific expression was performed using DAVID and BioGPS Mouse Cell Type, Tissue Gene Expression, and Podocyte mRNA Expression dataset
*16 genes located on the CysC QTL had probes on the microarray and thus the expression value was available only for them.
References:
DAVID: Huang da W, Sherman BT, Lempicki RA. Systematic and integrative analysis of large gene lists using DAVID bioinformatics resources. Nat Protoc 2009; 4: 44-57.
Podocyte: Kann M, Ettou S, Jung YL, et al. Genome-Wide Analysis of Wilms' Tumor 1-Controlled Gene Expression in Podocytes Reveals Key Regulatory Mechanisms. J Am Soc Nephrol 2015; 26: 2097-2104.
BioGPS Mouse Cell Type and Tissue Gene Expression dataset: Wu C, Macleod I, Su AI. BioGPS and MyGene.info: organizing online, gene-centric information. Nucleic Acids Res 2013; 41: D561-565.

## Sheet: Table S4
Table S4: List of significant and suggestive QTLs
Characteristics	n	h2	Obtained LOD score	Peak position			LOD threshold at P<0.05	LOD threshold at P<0.63	QTL type
				Chromosome	Position (Mb)	BCI
Body weight, g	120	0.79	7.73	Chr10	36.5	33.8 - 93.5	7.8	5.7	Suggestive
Body weight, g	120	0.79	6.93	Chr18	38.7	34.6 - 67.4	7.8	5.7	Suggestive
Plasma cystatin C, ng/mL	109	0.47	10.57	Chr2	148.7	149 - 149	7.7	5.7	Significant
Plasma cystatin C, ng/mL	109	0.47	6.6	Chr8	12.2	10.2 - 13	7.7	5.7	Suggestive
Plasma cystatin C, ng/mL	109	0.47	6.09	Chr9	111.4	10.7 - 112	7.7	5.7	Suggestive
Blood urea nitrogen, mg/dL	120	0.26	6.57	Chr15	97.5	96.3 - 97.5	7.5	5.7	Suggestive
Urine pH	111	0.13	5.9	Chr12	70.6	70.1 - 116	7.6	5.7	Suggestive
Urine Osmolality, mOsm/kg of water	117	0.3	6.06	Chr3	130.5	3.16 - 158	7.8	5.8	Suggestive
Urine Osmolality, mOsm/kg of water	117	0.3	6.62	Chr11	60.9	58.7 - 63.2	7.8	5.8	Suggestive
Urine volume, µL	120	0.58	6.86	Chr4	49.4	40.9 - 52.3	7.5	5.7	Suggestive
Urine volume, µL	120	0.58	6.06	Chr7	117.4	116 - 119	7.5	5.7	Suggestive
Urine volume, µL	120	0.58	6.79	Chr19	56.9	40.4 - 57.4	7.5	5.7	Suggestive
Urinary creatinine, mmol/L	83	0.32	6.39	Chr1	25.5	25.4 - 31.6	7.9	5.8	Suggestive
Urinary total Na, ng	92	0.13	7.33	Chr5	122.5	122 - 123	7.6	5.8	Suggestive
Na excretion rate, ng/h	92	0.13	7.33	Chr5	122.5	122 - 123	7.8	5.8	Suggestive
Urinary Na: creatinine, ng/mmol	82	0.46	5.87	Chr18	62.1	4.8 - 65	7.9	5.9	Suggestive

## Sheet: Table S5
Table S5: List of all significant eQTL found in mice kidney
Transcription cluster ID	Gene symbol	Gene name	ENTREZID	Probe position				SNP markers ID	Marker position				LOD threshold at P<0.05	Obtained LOD score	eQTL type
				Chromosome	Stand	Start (Mb)	Stop (Mb)		Chromosome	Position (Mb)	BCI low (Mb)	BCI high (Mb)
17211004	Adhfe1	alcohol dehydrogenase, iron containing, 1	76187	Chr1	+	9.54797	9.57636	backupJAX00000484	Chr1	9.55397	7.87214	9.9647	7.69225	27.3769	Cis
17211004	Adhfe1	alcohol dehydrogenase, iron containing, 1	76187	Chr1	+	9.54797	9.57636	UNC23283015	Chr13	105.406	104.819	106.673	7.69225	7.86498	Trans
17211131	Prex2	phosphatidylinositol-3,4,5-trisphosphate-dependent Rac exchange factor 2	109294	Chr1	+	10.9935	11.3024	UNC116817	Chr1	12.1167	7.69805	12.6067	7.9183	11.3432	Cis
17211445	B3gat2	beta-1,3-glucuronyltransferase 2 (glucuronosyltransferase S)	280645	Chr1	+	23.7618	23.8488	UNC23176651	Chr13	97.7924	97.7113	98.3164	9.15682	10.0044	Trans
17211458	Col9a1	collagen, type IX, alpha 1	12839	Chr1	+	24.1777	24.2524	UNC4531769	Chr2	172.855	172.827	173.524	7.84732	8.25492	Trans
17211998	Mrpl30	mitochondrial ribosomal protein L30	107734	Chr1	+	37.8905	37.8985	UNC10369238	Chr5	145.019	143.872	146.674	7.81985	7.91536	Trans
17212199	Il1rl2	interleukin 1 receptor-like 2	107527	Chr1	+	40.3246	40.3654	UNC511891	Chr1	40.5887	40.563	41.5906	7.78577	8.93499	Cis
17212269	Slc9a4	solute carrier family 9 (sodium/hydrogen exchanger), member 4	110895	Chr1	+	40.5804	40.6301	UNC513116	Chr1	40.6829	40.5887	41.6511	7.82141	16.9378	Cis
17212269	Slc9a4	solute carrier family 9 (sodium/hydrogen exchanger), member 4	110895	Chr1	+	40.5804	40.6301	UNC7937338	Chr4	107.622	105.208	117.437	7.82141	7.91101	Trans
17212286	Slc9a2	solute carrier family 9 (sodium/hydrogen exchanger), member 2	226999	Chr1	+	40.6818	40.7685	UNC511891	Chr1	40.5887	40.5887	41.5576	7.89845	12.6118	Cis
17212548	Dnah7b	dynein, axonemal, heavy chain 7B	227058	Chr1	+	46.0668	46.2408	UNC591481	Chr1	46.0209	43.6857	49.8906	8.09135	9.78543	Cis
17212792	Hibch	3-hydroxyisobutyryl-Coenzyme A hydrolase	227095	Chr1	+	52.845	52.9209	UNC679641	Chr1	53.0853	52.5398	53.2165	7.91879	12.4876	Cis
17212874	Coq10b	coenzyme Q10B	67876	Chr1	+	55.0528	55.072	UNC681990	Chr1	53.2994	51.5147	53.4659	7.7035	8.96613	Cis
17212982	Aox1	aldehyde oxidase 1	11761	Chr1	+	58.0299	58.1062	UNC729540	Chr1	57.3205	56.6704	58.1051	7.97443	20.9392	Cis
17213166	Gm15834	predicted gene 15834	100504455	Chr1	+	58.5052	58.5232	UNC752248	Chr1	59.2377	54.7646	59.3083	7.81019	8.73238	Cis
17213179	Ndufb3	NADH dehydrogenase (ubiquinone) 1 beta subcomplex 3	66495	Chr1	+	58.5864	58.5959	UNC745540	Chr1	58.567	58.2213	59.1887	7.76056	15.4074	Cis
17213189	Gm20257	caspase 8 pseudogene	100504501	Chr1	+	58.6552	58.6557	UNC741530	Chr1	58.2565	58.1849	61.7423	7.78008	8.02233	Cis
17213295	Nop58	NOP58 ribonucleoprotein	55989	Chr1	+	59.685	59.712	UNC4149656	Chr2	144.832	144.832	145.115	8.75829	8.84048	Trans
17213349	Carf	calcium response factor	241066	Chr1	+	60.1054	60.1508	UNC754930	Chr1	59.4264	59.3585	60.0568	7.64314	9.15273	Cis
17213369	Nbeal1	neurobeachin like 1	269198	Chr1	+	60.1817	60.3319	UNC707026	Chr1	55.419	54.7646	64.2537	8.02431	8.17518	Trans
17213702	Pikfyve	phosphoinositide kinase, FYVE type zinc finger containing	18711	Chr1	+	65.1867	65.2737	UNC832262	Chr1	66.25	62.6251	72.1468	7.58773	7.72616	Cis
17213990	Atic	5-aminoimidazole-4-carboxamide ribonucleotide formyltransferase/IMP cyclohydrolase	108147	Chr1	+	71.5572	71.5796	UNC904171	Chr1	71.5744	70.7192	71.7626	7.69781	13.6803	Cis
17214018	Gm8883	predicted gene 8883	667931	Chr1	+	71.8882	71.8912	UNC29636191	Chr18	76.5605	75.5593	77.7377	7.75195	8.19941	Trans
17214045	Tmem169	transmembrane protein 169	271711	Chr1	+	72.293	72.303	UNC916311	Chr1	72.3292	72.1978	73.3168	7.76922	11.3704	Cis
17214269	Plcd4	phospholipase C, delta 4	18802	Chr1	+	74.5429	74.5662	JAX00255494	Chr1	75.5587	74.5839	75.7994	7.83706	8.99312	Cis
17214368	Cyp27a1	cytochrome P450, family 27, subfamily a, polypeptide 1	104086	Chr1	+	74.7136	74.7378	UNC956412	Chr1	75.5277	74.5781	75.7994	7.90417	10.6597	Cis
17214543	Gmppa	GDP-mannose pyrophosphorylase A	69080	Chr1	+	75.436	75.4431	UNC010577570	Chr1	77.3031	75.619	77.3031	8.06439	18.6501	Cis
17214564	Asic4	acid-sensing (proton-gated) ion channel family member 4	241118	Chr1	+	75.4505	75.4738	UNC3981251	Chr2	131.788	131.708	132.548	7.80604	8.02052	Trans
17214665	Sgpp2	sphingosine-1-phosphate phosphotase 2	433323	Chr1	+	78.3104	78.42	UNC994199	Chr1	78.5458	77.3031	78.8103	7.93915	9.59992	Cis
17214672	Mogat1	monoacylglycerol O-acyltransferase 1	68393	Chr1	+	78.511	78.5382	JAX00256288	Chr1	78.3185	78.0731	78.565	7.68087	25.3817	Cis
17214865	Daw1	dynein assembly factor with WDR repeat domains 1	71227	Chr1	+	83.1598	83.2105	UNC26472109	Chr16	23.0144	18.2257	24.2751	7.8308	8.24879	Trans
17215097	B3gnt7	UDP-GlcNAc:betaGal beta-1,3-N-acetylglucosaminyltransferase 7	227327	Chr1	+	86.3032	86.307	UNC1077785	Chr1	85.8389	84.0242	86.63	7.62106	9.1537	Cis
17215240	Efhd1	EF hand domain containing 1	98363	Chr1	+	87.2644	87.3103	UNC1094139	Chr1	87.8042	87.4916	88.7312	7.70263	11.8424	Cis
17215372	Scarna6	small Cajal body-specific RNA 6	100217415	Chr1	+	87.7846	87.7848	UNC1103435	Chr1	88.7312	82.9764	90.0627	9.03148	10.2269	Cis
17215429	Ugt1a10	UDP glycosyltransferase 1 family, polypeptide A10	394430	Chr1	+	88.0554	88.2198	UNC1095392	Chr1	87.9624	87.4916	89.0745	9.19393	13.4863	Cis
17215429	Ugt1a10	UDP glycosyltransferase 1 family, polypeptide A10	394430	Chr1	+	88.0554	88.2198	JAX00723372	ChrX	169.985	169.922	170.008	9.19393	12.9794	Trans
17215539	Spp2	secreted phosphoprotein 2	75396	Chr1	+	88.407	88.4264	UNC1095781	Chr1	88.0183	87.3761	88.9603	7.65461	11.0099	Cis
17215629	Mlph	melanophilin	171531	Chr1	+	90.9151	90.9511	UNC1135014	Chr1	90.9082	90.9047	91.3503	7.76996	22.9095	Cis
17215773	Traf3ip1	TRAF3 interacting protein 1	74019	Chr1	+	91.4948	91.5289	UNC1136684	Chr1	91.0035	90.233	92.1306	9.22676	9.8229	Cis
17215834	Dusp28	dual specificity phosphatase 28	67446	Chr1	+	92.907	92.9085	UNC26063400	Chr15	88.3827	88.0123	89.8814	7.62413	7.83386	Trans
17215834	Dusp28	dual specificity phosphatase 28	67446	Chr1	+	92.907	92.9085	UNC1161039	Chr1	92.9479	92.6702	92.9854	7.62413	12.9939	Cis
17215885	Agxt	alanine-glyoxylate aminotransferase	11611	Chr1	+	93.1352	93.1454	UNC1173017	Chr1	94.2798	12.2731	116.044	7.85443	8.4916	Cis
17215932	Sned1	sushi, nidogen and EGF-like domains 1	208777	Chr1	+	93.2359	93.2967	UNC13970361	Chr7	138.419	138.363	138.824	7.94286	8.08279	Trans
17216031	Farp2	FERM, RhoGEF and pleckstrin domain protein 2	227377	Chr1	+	93.5287	93.6216	UNC1221473	Chr1	98.6578	93.4811	100.928	7.65549	8.14837	Trans
17216153	4930440C22Rik	RIKEN cDNA 4930440C22 gene	74689	Chr1	+	94.7975	94.8024	UNC12309135	Chr6	145.209	144.543	145.342	8.3254	8.48879	Trans
17216478	Serpinb8	serine (or cysteine) peptidase inhibitor, clade B, member 8	20725	Chr1	+	107.59	107.608	backupUNC010207769	Chr1	107.715	106.379	110.853	7.88297	15.6673	Cis
17216620	Tfcp2l1	transcription factor CP2-like 1	81879	Chr1	+	118.628	118.685	UNC1442162	Chr1	113.394	108.347	120.894	7.61618	8.43032	Trans
17216642	Sctr	secretin receptor	319229	Chr1	+	120.007	120.063	UNC1527951	Chr1	119.77	119.08	120.039	7.61313	19.591	Cis
17216690	Ccdc93	coiled-coil domain containing 93	70829	Chr1	+	121.431	121.501	UNC1559573	Chr1	122.17	121.249	126.136	7.71975	10.0953	Cis
17216745	Gpr39	G protein-coupled receptor 39	71111	Chr1	+	125.677	125.874	UNC1622588	Chr1	126.498	121.355	126.765	7.535	10.719	Cis
17216779	Acmsd	amino carboxymuconate semialdehyde decarboxylase	266645	Chr1	+	127.729	127.767	UNC22988394	Chr13	84.8193	84.3494	87.2452	8.04616	9.32135	Trans
17216779	Acmsd	amino carboxymuconate semialdehyde decarboxylase	266645	Chr1	+	127.729	127.767	UNC1639318	Chr1	127.738	126.874	128.15	8.04616	12.2969	Cis
17216931	Gm16083	predicted gene 16083	102640300	Chr1	+	130.463	130.557	UNC12059209	Chr6	128.411	128.092	129.073	8.00692	8.29257	Trans
17216960	Pigr	polymeric immunoglobulin receptor	18703	Chr1	+	130.827	130.852	UNC1692021	Chr1	132.257	130.348	132.693	7.54808	16.7465	Cis
17217083	Pm20d1	peptidase M20 domain containing 1	212933	Chr1	+	131.797	131.821	JAX00009529	Chr1	130.864	130.864	131.752	7.18277	22.2961	Cis
17217174	Klhdc8a	kelch domain containing 8A	213417	Chr1	+	132.299	132.307	JAX00009700	Chr1	133.157	128.978	133.669	7.58754	9.90952	Cis
17217440	Cyb5r1	cytochrome b5 reductase 1	72017	Chr1	+	134.406	134.412	UNC1722670	Chr1	134.641	134.213	136.48	7.90146	9.46372	Cis
17217596	Lmod1	leiomodin 1 (smooth muscle)	93689	Chr1	+	135.325	135.368	UNC29474682	Chr18	66.2759	66.1687	66.8688	7.81125	8.3711	Trans
17217777	Ddx59	DEAD (Asp-Glu-Ala-Asp) box polypeptide 59	67997	Chr1	+	136.415	136.44	UNC1748420	Chr1	136.419	135.987	136.624	7.72782	10.8128	Cis
17217914	Aspm	abnormal spindle microtubule assembly	12316	Chr1	+	139.455	139.494	UNC3778698	Chr2	113.873	113.607	115.879	7.8611	9.27994	Trans
17218233	Colgalt2	collagen beta(1-O)galactosyltransferase 2	269132	Chr1	+	152.4	152.509	UNC1960105	Chr1	152.445	152.19	153.311	7.76051	15.6385	Cis
17218277	Nmnat2	nicotinamide nucleotide adenylyltransferase 2	226518	Chr1	+	152.955	153.119	JAX00075291	Chr17	35.0312	33.0898	35.3279	7.89106	7.98045	Trans
17218363	Zfp648	zinc finger protein 648	100503355	Chr1	+	154.201	154.205	UNC1983810	Chr1	154.144	152.92	155.743	7.74491	10.1374	Cis
17218366	Stx6	syntaxin 6	58244	Chr1	+	155.159	155.203	UNC1981188	Chr1	153.964	153.593	155.604	8.16782	13.2803	Cis
17218377	Acbd6	acyl-Coenzyme A binding domain containing 6	72482	Chr1	+	155.558	155.687	JAX00272363	Chr1	155.654	154.081	156.054	7.72619	9.19559	Cis
17218465	Cryzl2	crystallin zeta like 2	226527	Chr1	+	157.459	157.489	UNC2020818	Chr1	157.38	156.972	164.372	8.83139	9.84719	Cis
17218701	Tnfsf4	tumor necrosis factor (ligand) superfamily, member 4	22164	Chr1	+	161.395	161.418	JAX00527291	Chr3	77.448	71.8708	80.033	8.08288	9.04316	Trans
17218835	Sell	selectin, lymphocyte	20343	Chr1	+	164.062	164.081	UNC25614010	Chr15	53.9958	53.7532	54.1329	11.2957	11.5769	Trans
17218861	F5	coagulation factor V	14067	Chr1	+	164.152	164.22	UNC2093253	Chr1	164.003	164.003	164.515	7.6607	30.929	Cis
17218907	Nme7	NME/NM23 family member 7	171567	Chr1	+	164.308	164.437	UNC26574894	Chr16	30.1805	29.7224	30.4529	8.00331	8.59694	Trans
17218923	Gm26685	predicted gene, 26685	102635083	Chr1	+	164.503	164.515	UNC2105769	Chr1	164.847	164.21	164.911	7.85518	22.6682	Cis
17219011	Cd247	CD247 antigen	12503	Chr1	+	165.781	165.877	UNC17647169	Chr10	27.9101	27.4681	38.5889	8.02404	9.0722	Trans
17219086	Tmco1	transmembrane and coiled-coil domains 1	68944	Chr1	+	167.309	167.332	UNC012035201	Chr1	167.196	166.799	167.425	7.80959	16.3242	Cis
17219110	Rxrg	retinoid X receptor gamma	20183	Chr1	+	167.598	167.64	UNC2148551	Chr1	168.077	167.674	168.4	7.81203	10.0268	Cis
17219156	3110045C21Rik	RIKEN cDNA 3110045C21 gene	67303	Chr1	+	169.969	169.972	UNC2191344	Chr1	170.85	169.126	171.438	7.85241	9.69728	Cis
17219185	Olfml2b	olfactomedin-like 2B	320078	Chr1	+	170.645	170.683	UNC2191344	Chr1	170.85	169.586	170.85	7.75994	14.4385	Cis
17219208	Cfap126	cilia and flagella associated protein 126	75472	Chr1	+	171.114	171.127	UNC2194776	Chr1	171.061	171.013	171.395	7.81308	13.1111	Cis
17219242	Apoa2	apolipoprotein A-II	11807	Chr1	+	171.225	171.226	JAX00276108	Chr1	171.357	171.061	171.438	7.71024	16.3663	Cis
17219356	Tstd1	thiosulfate sulfurtransferase (rhodanese)-like domain containing 1	226654	Chr1	+	171.419	171.42	UNC2202978	Chr1	171.835	171.013	172.128	7.53571	11.8689	Cis
17219362	F11r	F11 receptor	16456	Chr1	+	171.438	171.464	UNC2195301	Chr1	171.11	25.6979	171.597	7.79925	9.51835	Cis
17219448	Copa	coatomer protein complex subunit alpha	12847	Chr1	+	172.083	172.122	UNC2219145	Chr1	173.224	172.385	173.342	7.72814	15.1585	Cis
17219489	Pex19	peroxisomal biogenesis factor 19	19298	Chr1	+	172.129	172.136	UNC2206209	Chr1	172.175	169.417	172.686	8.28631	13.7084	Cis
17219546	Slamf9	SLAM family member 9	98365	Chr1	+	172.475	172.479	UNC2216194	Chr1	173.013	172.159	173.342	8.14501	8.70881	Cis
17219554	Igsf9	immunoglobulin superfamily, member 9	93842	Chr1	+	172.482	172.499	UNC2220523	Chr1	173.342	172.207	174.037	7.6606	13.3162	Cis
17219902	1700016C15Rik	RIKEN cDNA 1700016C15 gene	69428	Chr1	+	177.73	177.753	UNC2283247	Chr1	178.205	176.113	178.441	7.78658	11.9317	Cis
17219909	Catspere1	cation channel sperm associated auxiliary subunit epsilon 1	631584	Chr1	+	177.826	178.173	UNC2290941	Chr1	178.979	178.609	179.526	7.56042	25.5998	Cis
17220059	Cdc42bpa	CDC42 binding protein kinase alpha	226751	Chr1	+	179.961	180.165	UNC23185084	Chr13	98.3164	97.7576	100.548	7.91689	8.01136	Trans
17220249	9130409I23Rik	RIKEN cDNA 9130409I23 gene	619326	Chr1	+	181.051	181.06	backupUNC010861440	Chr1	181.538	180.745	182.072	8.15848	8.77961	Cis
17220255	Cnih4	cornichon family AMPA receptor auxiliary protein 4	98417	Chr1	+	181.151	181.168	JAX00278295	Chr1	180.745	180.398	181.776	7.5637	11.6064	Cis
17220364	Srp9	signal recognition particle 9	27058	Chr1	+	182.125	182.132	UNC2328165	Chr1	182.11	181.805	182.291	8.15626	14.7794	Cis
17220373	Trp53bp2	transformation related protein 53 binding protein 2	209456	Chr1	+	182.409	182.462	UNC2333302	Chr1	182.532	180.398	183.513	7.70104	9.17578	Cis
17220417	Susd4	sushi domain containing 4	96935	Chr1	+	182.764	182.896	UNC2336708	Chr1	182.806	178.888	182.861	8.12922	9.771	Cis
17220548	Eprs	glutamyl-prolyl-tRNA synthetase	107508	Chr1	+	185.363	185.428	UNC2365651	Chr1	185.641	185.166	185.641	8.78435	14.5691	Cis
17220751	Angel2	angel homolog 2	52477	Chr1	+	190.927	190.947	UNC2427211	Chr1	190.709	190.709	191.236	7.73654	14.1573	Cis
17220877	Gm10516	predicted gene 10516	100038712	Chr1	+	192.137	192.151	UNC2434804	Chr1	191.428	191.173	194	7.58868	9.62041	Cis
17220907	Irf6	interferon regulatory factor 6	54139	Chr1	+	193.153	193.171	UNC2421237	Chr1	190.145	188.659	195.36	8.13881	10.3297	Trans
17221186	Snhg6	small nucleolar RNA host gene 6	73824	Chr1	-	9.94212	9.94409	UNC86947	Chr1	10.0634	7.31344	12.741	13.7193	14.5061	Cis
17221193	Tcf24	transcription factor 24	100039596	Chr1	-	9.96043	9.96268	UNC49074	Chr1	7.5217	7.14384	10.0983	8.18439	12.9516	Trans
17221197	Tcf24	transcription factor 24	100039596	Chr1	-	9.96347	9.96747	JAX00241286	Chr1	7.31344	6.0637	10.0634	7.78084	16.0831	Trans
17221444	4930444P10Rik	RIKEN cDNA 4930444P10 gene	75799	Chr1	-	16.0661	16.0932	UNC174093	Chr1	16.2477	16.1066	16.4683	7.75102	8.22047	Cis
17221676	Gm4956	predicted gene 4956	241041	Chr1	-	21.2853	21.2982	UNC247939	Chr1	21.3473	21.2617	22.7499	7.97836	15.4596	Cis
17221786	Sdhaf4	succinate dehydrogenase complex assembly factor 4	68002	Chr1	-	23.996	24.0056	UNC282212	Chr1	23.7118	23.6119	25.3026	7.73319	23.7507	Cis
17221817	Col19a1	collagen, type XIX, alpha 1	12823	Chr1	-	24.2639	24.5875	UNC291812	Chr1	24.3052	24.0421	25.2349	7.92715	9.64738	Cis
17221878	Adgrb3	adhesion G protein-coupled receptor B3	210933	Chr1	-	25.068	25.8295	UNC361622	Chr1	29.5777	25.6979	30.3205	7.67408	20.0306	Trans
17221878	Adgrb3	adhesion G protein-coupled receptor B3	210933	Chr1	-	25.068	25.8295	JAX00589606	Chr5	99.4235	97.1496	99.5348	7.67408	8.50857	Trans
17222051	Gm15455	predicted gene 15455	433287	Chr1	-	33.8361	33.8385	JAX00722305	ChrX	161.39	160.429	162.44	7.71725	8.35552	Trans
17222072	Ccdc115	coiled-coil domain containing 115	69668	Chr1	-	34.4368	34.4396	UNC421161	Chr1	34.4588	32.0028	35.9012	7.96546	9.92029	Cis
17222080	Prss40	protease, serine 40	21756	Chr1	-	34.5441	34.5609	UNC10410669	Chr5	148.196	148.024	148.217	7.87212	8.96653	Trans
17222321	4930439A04Rik	RIKEN cDNA 4930439A04 gene	78119	Chr1	-	37.3298	37.3342	UNC18846614	Chr10	120.142	119.601	120.612	8.28758	8.78105	Trans
17222420	Lyg1	lysozyme G-like 1	69541	Chr1	-	37.9468	37.9528	UNC15413129	Chr8	103.619	82.2019	105.112	7.82736	8.18457	Trans
17222618	Pantr1	POU domain, class 3, transcription factor 3 adjacent noncoding transcript 1	66297	Chr1	-	42.6483	42.6948	UNC534504	Chr1	42.1242	41.9508	42.5927	7.75522	8.44695	Cis
17222719	Col5a2	collagen, type V, alpha 2	12832	Chr1	-	45.3751	45.5031	JAX00249075	Chr1	43.8875	43.6857	50.0439	7.62174	17.0457	Cis
17223138	Pgap1	post-GPI attachment to proteins 1	241062	Chr1	-	54.4743	54.5576	UNC698050	Chr1	54.6809	53.6335	54.7646	7.64311	7.65314	Cis
17223200	Sf3b1	splicing factor 3b, subunit 1	81898	Chr1	-	54.9853	55.0274	JAX00252106	Chr1	58.1849	54.7646	59.2377	8.01026	9.44415	Trans
17223509	Mpp4	membrane protein, palmitoylated 4 (MAGUK p55 subfamily member 4)	227157	Chr1	-	59.1211	59.1616	UNC752248	Chr1	59.2377	57.6357	61.0494	7.62063	8.61778	Cis
17223616	Raph1	Ras association (RalGDS/AF-6) and pleckstrin homology domains 1	77300	Chr1	-	60.4832	60.5671	UNC775718	Chr1	61.2238	59.4777	62.5942	7.69416	8.34338	Cis
17223852	D630023F18Rik	RIKEN cDNA D630023F18 gene	98303	Chr1	-	65.1054	65.1232	UNC794882	Chr1	63.0474	62.689	63.934	8.02809	8.52477	Trans
17223946	Erbb4	erb-b2 receptor tyrosine kinase 4	13869	Chr1	-	68.04	69.1078	UNC30834242	ChrX	53.157	53.0495	56.8217	7.83141	8.59677	Trans
17224071	Fn1	fibronectin 1	14268	Chr1	-	71.586	71.6531	UNC907572	Chr1	71.794	71.6302	73.2486	7.51246	14.3385	Cis
17224125	Mreg	melanoregulin	381269	Chr1	-	72.1599	72.2123	UNC889525	Chr1	70.4198	69.3022	72.1986	7.84253	11.329	Cis
17224154	Ankar	ankyrin and armadillo repeat containing	319695	Chr1	-	72.6449	72.7005	UNC5664114	Chr3	83.1457	63.8175	101.408	7.90298	8.38067	Trans
17224180	Igfbp5	insulin-like growth factor binding protein 5	16011	Chr1	-	72.858	72.8747	UNC917820	Chr1	72.4286	72.118	73.4156	7.68249	10.3553	Cis
17224211	Tns1	tensin 1	21961	Chr1	-	73.9146	74.1244	UNC16318064	Chr9	48.2173	48.0076	49.3566	7.55482	8.52808	Trans
17224447	Slc23a3	solute carrier family 23 (nucleobase transporters), member 3	22626	Chr1	-	75.1258	75.1339	UNC28241635	Chr17	68.1067	67.731	68.3326	7.84004	8.4137	Trans
17224661	Epha4	Eph receptor A4	13838	Chr1	-	77.3687	77.5151	UNC982299	Chr1	77.5624	77.1888	77.7628	7.71101	17.5004	Cis
17224724	BC035947	cDNA sequence BC035947	269211	Chr1	-	78.4984	78.512	JAX00256220	Chr1	78.0731	77.9849	81.136	7.88317	19.9756	Cis
17224745	Wdfy1	WD repeat and FYVE domain containing 1	69368	Chr1	-	79.7043	79.776	UNC1015448	Chr1	79.9292	78.9157	80.0663	7.66495	19.1874	Cis
17224882	Col4a4	collagen, type IV, alpha 4	12829	Chr1	-	82.4514	82.5868	backupJAX00257246	Chr1	82.2688	82.0921	82.9764	7.62643	9.05336	Cis
17224942	Slc19a3	solute carrier family 19, member 3	80721	Chr1	-	83.0128	83.0384	UNC1052639	Chr1	82.9764	82.9764	87.2404	8.21323	15.9986	Cis
17225037	Slc16a14	solute carrier family 16 (monocarboxylic acid transporters), member 14	71781	Chr1	-	84.9064	84.9351	UNC1063044	Chr1	83.7408	82.9764	87.2699	7.83594	9.86327	Cis
17225286	Usp40	ubiquitin specific peptidase 40	227334	Chr1	-	87.9454	88.0074	UNC8771158	Chr5	21.5983	21.5983	21.5983	10.5582	11.3329	Trans
17225329	Hjurp	Holliday junction recognition protein	381280	Chr1	-	88.2595	88.2776	UNC6	Chr1	3.01027	3.01027	4.53103	7.68464	12.0422	Trans
17225460	Rab17	RAB17, member RAS oncogene family	19329	Chr1	-	90.9582	90.9696	UNC1105663	Chr1	88.862	76.7728	94.7193	7.81653	7.83929	Trans
17225535	Hdac4	histone deacetylase 4	208727	Chr1	-	91.9328	92.1483	UNC30722692	ChrX	21.0911	20.4013	38.539	7.95161	8.54729	Trans
17225580	Olfr1415	olfactory receptor 1415	258228	Chr1	-	92.4908	92.4913	UNC20489962	Chr11	117.545	116.868	120.501	7.65741	7.73979	Trans
17225603	Ankmy1	ankyrin repeat and MYND domain containing 1	241158	Chr1	-	92.8701	92.9029	JAX00018988	Chr10	66.3011	64.9024	66.6313	7.82421	8.25693	Trans
17225630	Kif1a	kinesin family member 1A	16560	Chr1	-	93.0185	93.1018	UNC1161441	Chr1	92.9854	92.9046	93.2234	8.19929	14.5104	Cis
17225728	Hdlbp	high density lipoprotein (HDL) binding protein	110611	Chr1	-	93.4081	93.4788	UNC1161441	Chr1	92.9854	92.3547	106.256	7.73761	9.31225	Cis
17225775	Thap4	THAP domain containing 4	67026	Chr1	-	93.7054	93.7548	UNC1238531	Chr1	99.4885	95.6159	99.8898	8.00493	10.2446	Trans
17225837	Slco4c1	solute carrier organic anion transporter family, member 4C1	227394	Chr1	-	96.8188	96.8722	UNC1209719	Chr1	97.5407	95.2473	98.6578	7.82451	8.50138	Cis
17225888	D1Ertd622e	DNA segment, Chr 1, ERATO Doi 622, expressed	52392	Chr1	-	97.6442	97.6619	UNC1175863	Chr1	94.5822	93.4811	97.6268	7.87911	10.1302	Trans
17226049	Kdsr	3-ketodihydrosphingosine reductase	70750	Chr1	-	106.721	106.76	backupUNC010206009	Chr1	106.467	105.074	107.853	12.4342	12.5404	Cis
17226062	Vps4b	vacuolar protein sorting 4B	20479	Chr1	-	106.765	106.797	UNC1562414	Chr1	122.388	95.7544	125.148	7.93288	8.33106	Trans
17226194	Ralb	v-ral simian leukemia viral oncogene B	64143	Chr1	-	119.47	119.505	UNC1561385	Chr1	122.312	108.347	122.67	7.68247	8.41952	Trans
17226486	2900009J06Rik	RIKEN cDNA 2900009J06 gene	100502745	Chr1	-	127.754	127.774	UNC1650519	Chr1	128.74	127.007	128.802	7.8083	8.24523	Cis
17226550	Mcm6	minichromosome maintenance complex component 6	17219	Chr1	-	128.332	128.36	UNC1643553	Chr1	128.15	127.951	128.74	7.57416	19.1351	Cis
17226974	Sox13	SRY (sex determining region Y)-box 13	20668	Chr1	-	133.383	133.424	UNC16573049	Chr9	69.3842	69.0147	69.9545	8.31479	8.53867	Trans
17227077	Prelp	proline arginine-rich end leucine-rich repeat	116847	Chr1	-	133.911	133.921	UNC1716074	Chr1	134.097	133.176	136.121	7.77252	8.0615	Cis
17227221	Ptprv	protein tyrosine phosphatase, receptor type, V	13924	Chr1	-	135.109	135.133	UNC1635087	Chr1	127.455	120.182	134.07	7.59012	7.65802	Trans
17227297	Timm17a	translocase of inner mitochondrial membrane 17a	21854	Chr1	-	135.302	135.314	UNC1740277	Chr1	135.867	129.779	136.512	7.76253	9.60293	Cis
17228066	Tsen15	tRNA splicing endonuclease subunit 15	66637	Chr1	-	152.371	152.387	UNC19086518	Chr11	11.4321	10.469	18.0097	7.75301	7.77209	Trans
17228066	Tsen15	tRNA splicing endonuclease subunit 15	66637	Chr1	-	152.371	152.387	UNC1949073	Chr1	151.759	150.315	152.71	7.75301	13.7545	Cis
17228471	Tor1aip1	torsin A interacting protein 1	208263	Chr1	-	156.006	156.036	UNC2003908	Chr1	156.027	155.518	156.265	7.73656	12.5327	Cis
17228490	Fam163a	family with sequence similarity 163, member A	329274	Chr1	-	156.077	156.205	UNC2012484	Chr1	156.736	155.986	156.898	7.48773	22.1722	Cis
17228544	Soat1	sterol O-acyltransferase 1	20652	Chr1	-	156.429	156.474	UNC2031646	Chr1	158.231	156.238	159.258	9.85371	11.3969	Cis
17228611	Tex35	testis expressed 35	73435	Chr1	-	157.099	157.109	UNC752248	Chr1	59.2377	58.1849	181.414	7.83736	7.8418	Trans
17228871	Suco	SUN domain containing ossification factor	226551	Chr1	-	161.817	161.877	UNC2066181	Chr1	161.601	161.168	161.766	7.79325	14.0817	Cis
17228906	Dnm3	dynamin 3	103967	Chr1	-	161.983	162.478	JAX00273701	Chr1	161.617	158.231	162.184	7.80207	8.35295	Cis
17229036	Fmo2	flavin containing monooxygenase 2	55990	Chr1	-	162.875	162.899	UNC26306353	Chr16	8.70782	7.83701	9.50891	7.6407	8.07746	Trans
17229036	Fmo2	flavin containing monooxygenase 2	55990	Chr1	-	162.875	162.899	UNC010332330	Chr1	162.933	162.128	167.149	7.6407	8.45106	Cis
17229162	Gm16548	predicted gene 16548	100503816	Chr1	-	164.149	164.152	UNC2092923	Chr1	163.968	163.744	164.847	7.71412	15.456	Cis
17229336	Pogk	pogo transposable element with KRAB domain	71592	Chr1	-	166.385	166.41	backupUNC012018069	Chr1	165.083	163.492	166.76	7.91662	8.89441	Cis
17229403	Mgst3	microsomal glutathione S-transferase 3	66447	Chr1	-	167.372	167.394	backupUNC012208248	Chr1	167.425	167.284	167.543	7.5361	20.6775	Cis
17229417	Pbx1	pre B cell leukemia homeobox 1	18514	Chr1	-	168.121	168.432	JAX00661746	Chr8	15.0394	14.6292	15.0394	7.59423	7.69783	Trans
17229502	Uap1	UDP-N-acetylglucosamine pyrophosphorylase 1	107652	Chr1	-	170.142	170.175	JAX00012335	Chr1	168.429	168.407	170.48	7.88557	12.1359	Cis
17229607	Fcgr2b	Fc receptor, IgG, low affinity IIb	14130	Chr1	-	170.961	170.976	UNC2154967	Chr1	168.508	166.76	172.049	7.81183	11.0453	Trans
17229665	Ndufs2	NADH dehydrogenase (ubiquinone) Fe-S protein 2	226646	Chr1	-	171.235	171.247	UNC2194425	Chr1	171.039	170.161	171.705	8.68875	9.85071	Cis
17229842	Pea15a	phosphoprotein enriched in astrocytes 15A	18611	Chr1	-	172.197	172.207	UNC2192979	Chr1	170.953	170.907	172.128	7.76062	9.27452	Cis
17229948	Dusp23	dual specificity phosphatase 23	68440	Chr1	-	172.631	172.633	JAX00012680	Chr1	173.011	171.462	173.342	8.27825	11.6151	Cis
17230067	Mndal	myeloid nuclear differentiation antigen like	100040462	Chr1	-	173.857	173.873	JAX00276610	Chr1	173.646	173.141	179.038	8.69479	8.95462	Cis
17230102	Ifi202b	interferon activated gene 202B	26388	Chr1	-	173.963	173.983	JAX00276473	Chr1	172.956	171.743	175.477	8.37752	8.6687	Cis
17230345	Ahctf1	AT hook containing transcription factor 1	226747	Chr1	-	179.695	179.804	JAX00427104	Chr16	87.6189	86.1788	91.5693	7.5557	7.59199	Trans
17230484	Ephx1	epoxide hydrolase 1, microsomal	13849	Chr1	-	180.976	181.021	UNC2326114	Chr1	181.928	180.662	182.321	7.86266	16.6356	Cis
17230725	2020-03-01	mitochondrial amidoxime reducing component 1	66112	Chr1	-	184.787	184.811	UNC2352490	Chr1	184.66	182.98	186.469	7.56309	12.6413	Cis
17230760	Mark1	MAP/microtubule affinity regulating kinase 1	226778	Chr1	-	184.898	184.999	JAX00279191	Chr1	185.277	177.84	187.001	7.82802	8.61835	Cis
17230823	Lyplal1	lysophospholipase-like 1	226791	Chr1	-	186.088	186.117	UNC2370484	Chr1	185.916	185.817	186.537	8.29506	10.8548	Cis
17230945	Smyd2	SET and MYND domain containing 2	226830	Chr1	-	189.881	189.922	UNC2460751	Chr1	194.149	192.689	195.36	7.65332	9.20307	Trans
17231281	Gm16897	predicted gene, 16897	320400	Chr1	-	194.956	194.977	JAX00280906	Chr1	193.571	193.547	195.36	7.73174	12.0794	Cis
17548938	3110040M04Rik	RIKEN cDNA 3110040M04 gene	73176	Chr1	+	151.204	151.206	UNC1941988	Chr1	151.266	145.377	151.662	7.46662	10.2032	Cis
17548938	3110040M04Rik	RIKEN cDNA 3110040M04 gene	73176	Chr1	+	151.204	151.206	UNC8484916	Chr4	152.734	151.751	153.51	7.46662	8.22612	Trans
17231366	Plekhg1	pleckstrin homology domain containing, family G (with RhoGef domain) member 1	213783	Chr10	+	3.74047	3.96644	UNC100007206	Chr10	3.93183	3.78177	6.87466	7.93082	14.286	Cis
17231366	Plekhg1	pleckstrin homology domain containing, family G (with RhoGef domain) member 1	213783	Chr10	+	3.74047	3.96644	backupUNC060427091	Chr6	131.607	129.753	133.937	7.93082	8.19445	Trans
17231443	Ccdc170	coiled-coil domain containing 170	100504234	Chr10	+	4.48251	4.56203	JAX00122002	Chr4	94.3694	91.4271	97.5763	7.77029	7.97338	Trans
17231461	Esr1	estrogen receptor 1 (alpha)	13982	Chr10	+	4.6121	5.00128	UNC100006012	Chr10	4.28306	3.18058	4.54725	7.61449	9.41426	Cis
17231482	Vip	vasoactive intestinal polypeptide	22353	Chr10	+	5.63927	5.64744	UNC14807497	Chr8	57.897	57.768	60.8452	8.14354	8.34284	Trans
17231522	Lrp11	low density lipoprotein receptor-related protein 11	237253	Chr10	+	7.58984	7.62434	UNC2606288	Chr2	13.6765	13.0571	13.7206	7.70264	8.78149	Trans
17231574	Ppil4	peptidylprolyl isomerase (cyclophilin)-like 4	67418	Chr10	+	7.7929	7.82298	backupUNC100355859	Chr10	5.69466	5.26479	8.44379	7.6636	11.8832	Trans
17231690	Sf3b5	splicing factor 3b, subunit 5	66125	Chr10	+	13.0085	13.0091	UNC17448713	Chr10	13.2863	13.0089	13.4249	7.60827	11.7554	Cis
17231717	Fuca2	fucosidase, alpha-L- 2, plasma	66848	Chr10	+	13.4995	13.519	UNC17452844	Chr10	13.5875	12.8288	13.8575	8.14483	20.7976	Cis
17231774	Nmbr	neuromedin B receptor	18101	Chr10	+	14.7602	14.7706	UNC17452343	Chr10	13.5632	12.8622	13.8575	7.80094	13.9199	Cis
17231925	Map7	microtubule-associated protein 7	17761	Chr10	+	20.1485	20.2813	UNC17540515	Chr10	20.125	20.125	20.3743	7.69814	17.8137	Cis
17231973	Ahi1	Abelson helper integration site 1	52906	Chr10	+	20.9525	21.0802	UNC17555875	Chr10	21.4058	20.8637	21.9236	7.70761	8.87976	Cis
17232195	Taar7f	trace amine-associated receptor 7F	435207	Chr10	+	24.0495	24.0502	JAX00622044	Chr6	110.581	108.969	110.663	8.11754	8.5241	Trans
17232332	Arhgap18	Rho GTPase activating protein 18	73910	Chr10	+	26.7725	26.9182	UNC17634621	Chr10	27.0148	26.1388	27.5244	7.67394	16.4158	Cis
17232426	Echdc1	enoyl Coenzyme A hydratase domain containing 1	52665	Chr10	+	29.3132	29.3458	JAX00016227	Chr10	28.8616	27.6222	30.5371	7.50779	8.48498	Cis
17232444	Hddc2	HD domain containing 2	69692	Chr10	+	31.3134	31.3282	UNC17683151	Chr10	30.7823	30.706	35.7397	7.7213	13.4538	Cis
17232778	Mettl24	methyltransferase like 24	327747	Chr10	+	40.6833	40.811	UNC17818928	Chr10	41.1633	39.9852	41.3584	7.88151	12.3186	Cis
17232778	Mettl24	methyltransferase like 24	327747	Chr10	+	40.6833	40.811	UNC20094985	Chr11	89.7636	89.7171	90.0335	7.88151	8.4647	Trans
17232881	Ppil6	peptidylprolyl isomerase (cyclophilin)-like 6	73075	Chr10	+	41.4904	41.5142	UNC17822948	Chr10	41.5783	38.6187	43.534	7.72663	8.65709	Cis
17233078	Prep	prolyl endopeptidase	19072	Chr10	+	45.0721	45.159	UNC16565231	Chr9	68.833	68.6232	69.3275	8.48077	8.81206	Trans
17233306	Slc35f1	solute carrier family 35, member F1	215085	Chr10	+	52.6905	53.1094	UNC17998076	Chr10	55.4197	54.3694	56.6797	8.01576	14.5918	Trans
17233384	Fabp7	fatty acid binding protein 7, brain	12140	Chr10	+	57.7849	57.7883	UNC18025334	Chr10	57.6715	57.6715	58.8132	7.75961	15.2831	Cis
17233408	Gcc2	GRIP and coiled-coil domain containing 2	70297	Chr10	+	58.2558	58.3054	JAX00018380	Chr10	57.8116	55.5231	62.1491	7.65774	7.82113	Cis
17233600	Ascc1	activating signal cointegrator 1 complex subunit 1	69090	Chr10	+	60.0028	60.1	UNC18048671	Chr10	59.8962	58.9696	60.794	7.65651	15.6643	Cis
17233708	Lrrc20	leucine rich repeat containing 20	216011	Chr10	+	61.4759	61.5812	JAX00290990	Chr10	63.9486	61.037	64.2841	7.53409	7.86958	Trans
17233720	Ppa1	pyrophosphatase (inorganic) 1	67895	Chr10	+	61.6486	61.6724	UNC18074492	Chr10	61.9217	58.9424	64.4691	7.88016	9.24465	Cis
17233751	Aifm2	apoptosis-inducing factor, mitochondrion-associated 2	71361	Chr10	+	61.7153	61.7391	backupJAX00290713	Chr10	61.8465	58.9424	64.034	7.7317	8.72044	Cis
17233811	Dna2	DNA replication helicase/nuclease 2	327762	Chr10	+	62.947	62.9738	UNC18082076	Chr10	62.4587	61.037	66.2584	9.21946	12.2735	Cis
17233860	Pbld2	phenazine biosynthesis-like protein domain containing 2	67307	Chr10	+	63.0243	63.0587	UNC18077773	Chr10	62.1289	60.9554	63.9335	8.31549	12.7279	Cis
17233873	Pbld1	phenazine biosynthesis-like protein domain containing 1	68371	Chr10	+	63.0658	63.0773	UNC18094497	Chr10	63.5563	61.1801	64.3347	7.71639	17.8624	Cis
17233920	Dnajc12	DnaJ heat shock protein family (Hsp40) member C12	30045	Chr10	+	63.3825	63.4085	JAX00515772	Chr3	16.8933	10.9899	18.5296	7.56421	7.92607	Trans
17233920	Dnajc12	DnaJ heat shock protein family (Hsp40) member C12	30045	Chr10	+	63.3825	63.4085	UNC18090723	Chr10	63.213	62.1491	64.49	7.56421	10.9144	Cis
17234116	Ccdc6	coiled-coil domain containing 6	76551	Chr10	+	70.0974	70.1928	UNC18196852	Chr10	71.0252	70.0109	72.7927	7.91258	12.3742	Cis
17234146	Fam13c	family with sequence similarity 13, member C	71721	Chr10	+	70.4407	70.5585	UNC18183816	Chr10	70.1654	70.0109	70.6517	7.63533	15.3391	Cis
17234175	Ipmk	inositol polyphosphate multikinase	69718	Chr10	+	71.348	71.3852	UNC18223331	Chr10	73.3045	71.3574	75.8428	7.73121	10.3769	Cis
17234192	Zwint	ZW10 interactor	52696	Chr10	+	72.6549	72.6747	UNC040389759	Chr4	23.2867	22.7088	27.0757	7.98551	8.06091	Trans
17234192	Zwint	ZW10 interactor	52696	Chr10	+	72.6549	72.6747	UNC18221643	Chr10	73.1563	71.3574	73.1563	7.98551	12.6966	Cis
17234273	Rab36	RAB36, member RAS oncogene family	76877	Chr10	+	75.0371	75.0545	UNC18082772	Chr10	62.5358	61.037	63.897	7.69023	8.0977	Trans
17234273	Rab36	RAB36, member RAS oncogene family	76877	Chr10	+	75.0371	75.0545	UNC12298596	Chr6	144.486	143.263	144.986	7.69023	8.01749	Trans
17234345	Gm5779	ribosomal protein, large, P0 pseudogene	544707	Chr10	+	75.3522	75.3528	UNC26140129	Chr15	93.9818	92.0252	94.1385	7.92356	8.09256	Trans
17234367	Snrpd3	small nuclear ribonucleoprotein D3	67332	Chr10	+	75.518	75.5354	UNC18246512	Chr10	75.3184	74.3346	75.8428	7.78843	13.1395	Cis
17234373	Ggt1	gamma-glutamyltransferase 1	14598	Chr10	+	75.5616	75.5861	backupUNC100088273	Chr10	75.645	73.4259	77.822	7.70728	8.85275	Cis
17234494	S100b	S100 protein, beta polypeptide, neural	20203	Chr10	+	76.2539	76.2609	UNC18254509	Chr10	76.0588	76.0588	82.4697	8.22666	16.9209	Cis
17234588	Ftcd	formiminotransferase cyclodeaminase	14317	Chr10	+	76.5757	76.5903	UNC18280208	Chr10	78.0633	76.3346	78.0633	7.64559	20.3897	Cis
17234612	Slc19a1	solute carrier family 19 (folate transporter), member 1	20509	Chr10	+	77.0323	77.0608	UNC29351831	Chr18	58.5429	58.3879	60.9822	7.75442	8.36846	Trans
17234744	1700009J07Rik	RIKEN cDNA 1700009J07 gene	75188	Chr10	+	77.8935	77.8961	UNC18273100	Chr10	77.4899	76.1483	78.0633	7.69807	9.6833	Cis
17234803	Cstb	cystatin B	13014	Chr10	+	78.4257	78.4276	UNC18303127	Chr10	80.8224	76.0588	80.84	7.75399	13.6666	Trans
17234856	Olfr1352	olfactory receptor 1352	259074	Chr10	+	78.9811	78.9846	UNC8143428	Chr4	124.9	124.628	125.199	7.82975	8.8226	Trans
17234963	Palm	paralemmin	18483	Chr10	+	79.8066	79.8204	UNC26180159	Chr15	97.0441	96.1371	97.4595	7.73618	7.90331	Trans
17235018	Cfd	complement factor D (adipsin)	11537	Chr10	+	79.8909	79.8927	JAX00352816	Chr13	24.8189	21.7196	30.0865	7.49427	7.87832	Trans
17235399	Izumo4	IZUMO family member 4	71564	Chr10	+	80.7027	80.7054	UNC18256994	Chr10	76.2415	76.1483	80.5081	7.66913	12.5334	Trans
17235443	Sf3a2	splicing factor 3a, subunit 2	20222	Chr10	+	80.7982	80.8049	JAX00122211	Chr4	97.157	95.3269	97.6613	7.80436	8.37212	Trans
17235783	BC025920	zinc finger protein pseudogene	268319	Chr10	+	81.6063	81.6207	UNC18313165	Chr10	82.4697	76.0588	83.0334	7.5884	12.0229	Cis
17235826	Zfp433	zinc finger protein 433	73610	Chr10	+	81.7048	81.7203	UNC18311047	Chr10	82.2387	81.0038	82.3797	7.85413	16.8375	Cis
17235911	1700028I16Rik	RIKEN cDNA 1700028I16 gene	70003	Chr10	+	82.8122	82.824	UNC18289662	Chr10	78.8774	76.3346	83.0472	7.9387	8.1021	Trans
17235941	Chst11	carbohydrate sulfotransferase 11	58250	Chr10	+	82.9856	83.1933	UNC7044534	Chr4	34.8859	34.0494	34.971	7.40954	7.99568	Trans
17235941	Chst11	carbohydrate sulfotransferase 11	58250	Chr10	+	82.9856	83.1933	UNC18320638	Chr10	82.9942	82.4697	83.0334	7.40954	22.889	Cis
17236003	Tcp11l2	t-complex 11 (mouse) like 2	216198	Chr10	+	84.5767	84.6138	UNC18343181	Chr10	84.6718	81.6616	85.7915	8.02729	9.98363	Cis
17236155	Fbxo7	F-box protein 7	69754	Chr10	+	86.022	86.0505	UNC18370180	Chr10	87.0297	86.2575	87.0297	7.78563	14.4394	Cis
17236204	Ttc41	tetratricopeptide repeat domain 41	103220	Chr10	+	86.7058	86.7766	UNC18365890	Chr10	86.7043	56.753	87.4556	7.79296	8.72198	Cis
17236227	Nt5dc3	5'-nucleotidase domain containing 3	103466	Chr10	+	86.779	86.8343	UNC18366583	Chr10	86.7603	86.6948	87.4889	7.06994	14.7804	Cis
17236411	1500026H17Rik	RIKEN cDNA 1500026H17 gene	69002	Chr10	+	89.6864	89.7008	UNC18411753	Chr10	90.3166	88.9566	90.3166	7.78764	12.7142	Cis
17236502	Cdk17	cyclin-dependent kinase 17	237459	Chr10	+	93.161	93.2663	backupUNC051738198	Chr5	120.993	117.774	121.824	7.59882	7.72438	Trans
17236525	Mir1931	microRNA 1931	100316689	Chr10	+	93.1628	93.1629	UNC18450470	Chr10	93.2268	92.4587	93.2268	7.97997	10.3933	Cis
17236531	Lta4h	leukotriene A4 hydrolase	16993	Chr10	+	93.4534	93.4847	UNC18453269	Chr10	93.4243	92.8138	93.9943	7.7672	10.2095	Cis
17236733	5730420D15Rik	RIKEN cDNA 5730420D15 gene	70523	Chr10	+	95.4174	95.4284	UNC080440907	Chr8	26.3842	25.4103	27.4172	7.69624	7.88511	Trans
17236882	Dusp6	dual specificity phosphatase 6	67603	Chr10	+	99.2633	99.2672	JAX00297101	Chr10	99.222	99.0245	99.222	6.98886	22.8164	Cis
17237035	Slc6a15	solute carrier family 6 (neurotransmitter transporter), member 15	103098	Chr10	+	103.368	103.419	JAX00021807	Chr10	104.108	100.312	109.018	8.15127	8.74473	Cis
17237084	Ccdc59	coiled-coil domain containing 59	52713	Chr10	+	105.841	105.848	UNC18649534	Chr10	106.708	105.631	108.418	7.54073	7.56603	Cis
17237094	Ppfia2	protein tyrosine phosphatase, receptor type, f polypeptide (PTPRF), interacting protein (liprin), alpha 2	327814	Chr10	+	106.47	106.933	UNC18640896	Chr10	106.126	102.542	107.991	7.91104	8.33774	Cis
17237132	Lin7a	lin-7 homolog A (C. elegans)	108030	Chr10	+	107.272	107.424	UNC18659400	Chr10	107.338	107.338	109.863	8.28896	10.6902	Cis
17237208	Csrp2	cysteine and glycine-rich protein 2	13008	Chr10	+	110.92	110.94	UNC2883726	Chr2	36.8295	36.4539	36.9333	8.37279	8.5768	Trans
17237208	Csrp2	cysteine and glycine-rich protein 2	13008	Chr10	+	110.92	110.94	UNC18714935	Chr10	111.022	110.991	111.846	8.37279	19.665	Cis
17237280	Phlda1	pleckstrin homology like domain, family A, member 1	21664	Chr10	+	111.506	111.509	UNC18708909	Chr10	110.596	110.361	111.81	7.69445	8.50832	Cis
17237284	Krr1	KRR1, small subunit (SSU) processome component, homolog (yeast)	52705	Chr10	+	111.973	111.985	UNC18714935	Chr10	111.022	111.022	113.859	8.65989	14.8939	Cis
17237336	Kcnc2	potassium voltage gated channel, Shaw-related subfamily, member 2	268345	Chr10	+	112.271	112.465	UNC18732695	Chr10	112.346	111.81	113.859	7.80644	15.2307	Cis
17237412	Tspan8	tetraspanin 8	216350	Chr10	+	115.817	115.85	UNC18763912	Chr10	114.55	114.25	116.001	7.91471	12.2843	Cis
17237426	Ptprr	protein tyrosine phosphatase, receptor type, R	19279	Chr10	+	116.018	116.275	UNC18787460	Chr10	116.046	115.772	117.973	7.79683	10.0901	Cis
17237510	4933412E12Rik	RIKEN cDNA 4933412E12 gene	71086	Chr10	+	116.951	116.963	UNC18764786	Chr10	114.602	114.064	117.963	7.75318	8.11515	Trans
17237522	Best3	bestrophin 3	382427	Chr10	+	116.986	117.025	UNC18804559	Chr10	117.332	116.397	117.376	7.7593	12.0221	Cis
17237564	Mdm1	transformed mouse 3T3 cell double minute 1	17245	Chr10	+	118.142	118.168	UNC18813119	Chr10	118.008	117.967	119.583	7.82921	10.9627	Cis
17237665	Llph	LLP homolog, long-term synaptic facilitation (Aplysia)	66225	Chr10	+	120.227	120.232	UNC16641965	Chr9	74.5454	71.7296	74.8427	7.99966	8.43094	Trans
17237835	Ctdsp2	CTD (carboxy-terminal domain, RNA polymerase II, polypeptide A) small phosphatase 2	52468	Chr10	+	126.979	127	UNC18955855	Chr10	127.085	126.938	127.56	7.77824	13.0401	Cis
17237876	Mettl1	methyltransferase like 1	17299	Chr10	+	127.042	127.046	JAX00302054	Chr10	127.022	125.514	127.085	7.96669	14.0716	Cis
17237912	A730063M14Rik	RIKEN cDNA A730063M14 gene	100504703	Chr10	+	127.07	127.071	UNC18952537	Chr10	126.853	123.867	127.119	7.6979	9.93182	Cis
17238172	Rdh16	retinol dehydrogenase 16	19683	Chr10	+	127.814	127.816	UNC18963539	Chr10	127.808	127.735	127.826	7.6868	15.1487	Cis
17238179	Rdh18-ps	retinol dehydrogenase 18, pseudogene	380674	Chr10	+	127.843	127.844	UNC18963682	Chr10	127.83	127.808	128.357	7.68281	23.8431	Cis
17238184	Rdh19	retinol dehydrogenase 19	216453	Chr10	+	127.85	127.861	UNC18963760	Chr10	127.843	127.826	129.118	7.6851	11.3142	Cis
17238191	Rdh16f2	RDH16 family member 2	216454	Chr10	+	127.867	127.877	UNC18963815	Chr10	127.848	127.837	128.434	9.01612	14.0333	Cis
17238199	Sdr9c7	4short chain dehydrogenase/reductase family 9C, member 7	70061	Chr10	+	127.899	127.911	UNC18963727	Chr10	127.837	127.826	129.673	7.79436	10.3127	Cis
17238424	Cnpy2	canopy FGF signaling regulator 2	56530	Chr10	+	128.323	128.327	UNC18963682	Chr10	127.83	127.808	129.673	7.67471	8.80934	Cis
17238648	Olfr775	olfactory receptor 775	258538	Chr10	+	129.251	129.251	UNC15297770	Chr8	95.6077	89.4628	99.5873	7.93716	8.05243	Trans
17238834	Syne1	spectrin repeat containing, nuclear envelope 1	64009	Chr10	-	5.21086	5.21103	UNC29619871	Chr18	75.5323	75.5323	75.5323	8.19696	8.3022	Trans
17238854	Syne1	spectrin repeat containing, nuclear envelope 1	64009	Chr10	-	5.23332	5.23347	UNC29619871	Chr18	75.5323	75.5323	76.7443	7.98293	8.36011	Trans
17238860	Syne1	spectrin repeat containing, nuclear envelope 1	64009	Chr10	-	5.24301	5.24316	backupUNC100004350	Chr10	5.26479	5.26479	7.95482	7.60866	11.1509	Cis
17238868	Syne1	spectrin repeat containing, nuclear envelope 1	64009	Chr10	-	5.2493	5.24944	JAX00356321	Chr13	42.1596	42.0963	42.263	7.92324	12.0297	Trans
17238882	Syne1	spectrin repeat containing, nuclear envelope 1	64009	Chr10	-	5.26266	5.26281	UNC29619871	Chr18	75.5323	75.5323	75.5323	8.38698	8.85533	Trans
17238888	Syne1	spectrin repeat containing, nuclear envelope 1	64009	Chr10	-	5.27083	5.27099	JAX00014634	Chr10	3.18058	3.18058	4.54725	7.84745	10.467	Trans
17238922	Syne1	spectrin repeat containing, nuclear envelope 1	64009	Chr10	-	5.32259	5.32276	backupUNC100004350	Chr10	5.26479	5.26479	7.95482	8.84109	9.00025	Cis
17238930	Syne1	spectrin repeat containing, nuclear envelope 1	64009	Chr10	-	5.32947	5.32958	UNC17310990	Chr9	123.945	123.932	123.997	7.65662	9.20376	Trans
17239054	Pcmt1	protein-L-isoaspartate (D-aspartate) O-methyltransferase 1	18537	Chr10	-	7.62952	7.66354	UNC20541770	Chr11	121.977	120.846	121.977	7.86766	8.47777	Trans
17239184	Adgb	androglobin	215772	Chr10	-	10.3359	10.4723	UNC17419803	Chr10	11.2315	9.40958	11.5125	7.79736	14.8657	Cis
17239384	Phactr2	phosphatase and actin regulator 2	215789	Chr10	-	13.2248	13.4743	UNC17439712	Chr10	12.7473	12.7097	13.7515	8.24885	9.45346	Cis
17239461	Vta1	vesicle (multivesicular body) trafficking 1	66201	Chr10	-	14.655	14.7055	UNC17442370	Chr10	12.8795	12.4947	13.8575	7.70891	9.78778	Cis
17239611	Slc35d3	solute carrier family 35, member D3	76157	Chr10	-	19.8481	19.8514	UNC13724073	Chr7	119.248	117.806	119.478	7.89485	8.73006	Trans
17239616	Pex7	peroxisomal biogenesis factor 7	18634	Chr10	-	19.86	19.9076	UNC17538065	Chr10	19.9217	19.8506	20.0803	7.69139	13.3715	Cis
17239630	4930405J17Rik	RIKEN cDNA 4930405J17 gene	73811	Chr10	-	20.1993	20.2018	UNC17540933	Chr10	20.1575	20.125	20.2726	7.92467	21.9361	Cis
17239664	Myb	myeloblastosis oncogene	17863	Chr10	-	21.125	21.161	UNC25614010	Chr15	53.9958	53.9958	54.0225	20.6964	20.9004	Trans
17239687	Platr6	pluripotency associated transcript 6	628133	Chr10	-	21.8306	21.8448	UNC24318878	Chr14	79.2885	78.6402	79.3287	8.07314	9.44105	Trans
17239856	Akap7	A kinase (PRKA) anchor protein 7	432442	Chr10	-	25.1691	25.2991	UNC17616751	Chr10	25.7622	23.769	27.2112	7.67471	11.3836	Cis
17240043	Gm20300	predicted gene, 20300	100504586	Chr10	-	30.6032	30.6057	UNC17675237	Chr10	30.0766	27.9564	30.6261	7.63579	9.97583	Cis
17240043	Gm20300	predicted gene, 20300	100504586	Chr10	-	30.6032	30.6057	UNC10316234	Chr5	141.273	32.4269	142.14	7.63579	7.65391	Trans
17240045	Hint3	histidine triad nucleotide binding protein 3	66847	Chr10	-	30.6082	30.6185	UNC17682018	Chr10	30.706	27.9564	37.3856	8.06841	9.15896	Cis
17240089	Tpd52l1	tumor protein D52-like 1	21987	Chr10	-	31.3324	31.4459	UNC19177811	Chr11	17.7371	14.3803	18.0718	7.76491	7.88566	Trans
17240100	Rnf217	ring finger protein 217	268291	Chr10	-	31.5022	31.6097	JAX00016413	Chr10	31.3291	25.8525	33.6484	7.60124	11.9783	Cis
17240146	Zufsp	zinc finger with UFM1-specific peptidase domain	72580	Chr10	-	33.9192	33.9512	UNC12241824	Chr6	140.665	139.152	142.918	7.72513	8.14154	Trans
17240164	Rwdd1	RWD domain containing 1	66521	Chr10	-	33.9966	34.0196	UNC30271229	Chr19	37.1916	36.8949	37.745	7.74431	8.24748	Trans
17240199	Nt5dc1	5'-nucleotidase domain containing 1	319638	Chr10	-	34.2885	34.4185	UNC17731306	Chr10	34.4834	32.0619	35.6623	8.76419	11.2285	Cis
17240269	E130307A14Rik	RIKEN cDNA E130307A14 gene	327744	Chr10	-	39.6216	39.7319	UNC17801414	Chr10	39.8096	37.0773	40.9096	7.60277	8.70292	Cis
17240309	Mfsd4b5	major facilitator superfamily domain containing 4B5	215928	Chr10	-	39.9591	39.9866	UNC17802937	Chr10	39.9511	39.5517	40.6321	8.44901	14.241	Cis
17240323	Mfsd4b1	major facilitator superfamily domain containing 4B1	215929	Chr10	-	40.0019	40.0253	UNC17804144	Chr10	40.0258	39.9511	42.2948	8.54603	8.75303	Cis
17240330	Slc16a10	solute carrier family 16 (monocarboxylic acid transporters), member 10	72472	Chr10	-	40.0341	40.1422	UNC17811412	Chr10	40.6321	37.3277	43.0793	7.5936	8.20854	Cis
17240342	Rpf2	ribosome production factor 2 homolog	67239	Chr10	-	40.2233	40.247	UNC17806644	Chr10	40.2429	39.974	43.3356	8.22825	11.8139	Cis
17240467	Ccdc162	coiled-coil domain containing 162	75973	Chr10	-	41.655	41.6973	JAX00287924	Chr10	41.664	40.213	43.1694	7.74727	8.1297	Cis
17240484	Cep57l1	centrosomal protein 57-like 1	103268	Chr10	-	41.7193	41.8098	UNC17826526	Chr10	41.934	39.1596	43.6509	7.85595	10.1583	Cis
17240538	Afg1l	AFG1 like ATPase	215951	Chr10	-	42.3127	42.4785	UNC17838190	Chr10	42.7165	42.2722	43.4829	8.08411	17.3442	Cis
17240621	Crybg1	crystallin beta-gamma domain containing 1	11630	Chr10	-	43.951	44.0048	UNC17852837	Chr10	43.8073	43.8073	44.0434	7.80411	27.5516	Cis
17240880	Man1a	mannosidase 1, alpha	17155	Chr10	-	53.905	54.0758	UNC18015185	Chr10	56.8793	49.9027	57.5762	7.85397	10.1679	Trans
17240880	Man1a	mannosidase 1, alpha	17155	Chr10	-	53.905	54.0758	UNC16551815	Chr9	67.84	67.1874	68.6232	7.85397	8.47699	Trans
17240971	Edar	ectodysplasin-A receptor	13608	Chr10	-	58.6009	58.6756	UNC8186857	Chr4	128.038	127.892	128.867	7.85379	7.88523	Trans
17241038	Anapc16	anaphase promoting complex subunit 16	52717	Chr10	-	59.988	60.003	UNC18050949	Chr10	60.1263	59.4694	60.794	7.82684	12.4946	Cis
17241053	Cdh23	cadherin 23 (otocadherin)	22295	Chr10	-	60.3033	60.6872	UNC18041331	Chr10	59.3754	58.4183	59.6316	7.62649	13.0293	Cis
17241130	Slc29a3	solute carrier family 29 (nucleoside transporters), member 3	71279	Chr10	-	60.7121	60.7507	JAX00290557	Chr10	60.7327	60.5865	60.9304	7.66866	13.6098	Cis
17241294	Fam241b	family with sequence similarity 241, member B	69894	Chr10	-	62.1079	62.1439	UNC100071604	Chr10	64.4691	58.4183	66.2393	7.77554	8.72268	Trans
17241308	Tspan15	tetraspanin 15	70423	Chr10	-	62.1867	62.2311	UNC18081503	Chr10	62.4001	62.1915	63.6987	7.58255	10.2975	Cis
17241308	Tspan15	tetraspanin 15	70423	Chr10	-	62.1867	62.2311	UNC16834111	Chr9	89.2261	83.4585	95.5573	7.58255	7.93839	Trans
17241355	Hkdc1	hexokinase domain containing 1	216019	Chr10	-	62.3835	62.4225	UNC18062352	Chr10	60.9554	60.8524	63.6256	7.7376	8.42604	Cis
17241672	4930545H06Rik	RIKEN cDNA 4930545H06 gene	75148	Chr10	-	68.3191	68.3211	UNC18156108	Chr10	68.3471	68.2991	68.5772	7.68655	18.23	Cis
17241676	Cabcoco1	ciliary associated calcium binding coiled-coil 1	73287	Chr10	-	68.4311	68.5418	JAX00292067	Chr10	69.8682	68.619	70.922	7.71967	10.8127	Cis
17241709	Phyhipl	phytanoyl-CoA hydroxylase interacting protein-like	70911	Chr10	-	70.5578	70.5993	UNC18196852	Chr10	71.0252	70.0531	71.0252	7.60586	13.235	Cis
17241756	C730027H18Rik	RIKEN cDNA C730027H18 gene	319572	Chr10	-	71.1693	71.182	JAX00292429	Chr10	71.2288	71.1072	75.8428	7.91753	9.48697	Cis
17241780	Ube2d1	ubiquitin-conjugating enzyme E2D 1	216080	Chr10	-	71.2552	71.2623	UNC18223331	Chr10	73.3045	71.0252	75.7814	7.8773	8.9069	Trans
17241867	Cabin1	calcineurin binding protein 1	104248	Chr10	-	75.6465	75.7641	JAX00292927	Chr10	74.6932	74.3346	75.7143	7.83235	10.6418	Cis
17241921	Gstt3	glutathione S-transferase, theta 3	103140	Chr10	-	75.7742	75.7812	UNC18248787	Chr10	75.5093	73.1563	78.0633	7.70986	8.76677	Cis
17241934	Gstt1	glutathione S-transferase, theta 1	14871	Chr10	-	75.7838	75.7986	JAX00293096	Chr10	75.7814	71.2272	75.7814	8.60222	8.97627	Cis
17241962	Mif	macrophage migration inhibitory factor (glycosylation-inhibiting factor)	17319	Chr10	-	75.8594	75.8602	UNC5348309	Chr3	58.4194	57.1642	58.6001	7.78599	8.49435	Trans
17242145	Gm15343	predicted gene 15343	102639115	Chr10	-	76.5693	76.5705	UNC18289662	Chr10	78.8774	76.1483	80.84	7.69151	15.2826	Trans
17242516	Pdxk	pyridoxal (pyridoxine, vitamin B6) kinase	216134	Chr10	-	78.4382	78.4649	UNC18280208	Chr10	78.0633	76.074	82.0454	8.05479	10.1554	Cis
17242842	Gamt	guanidinoacetate methyltransferase	14431	Chr10	-	80.2582	80.261	UNC18296842	Chr10	79.8451	78.7766	82.9091	9.58994	10.539	Cis
17242959	Atp8b3	ATPase, class I, type 8B, member 3	67331	Chr10	-	80.5197	80.5391	UNC2419208	Chr1	189.987	189.832	190.125	7.83856	8.12225	Trans
17243022	Btbd2	BTB (POZ) domain containing 2	208198	Chr10	-	80.6428	80.657	JAX00293142	Chr10	76.074	76.0588	82.1322	9.6311	9.87513	Trans
17243460	Zfp781	zinc finger protein 781	331188	Chr10	-	81.9021	81.911	UNC23936763	Chr14	45.1822	37.5124	76.2451	7.87719	8.02249	Trans
17243460	Zfp781	zinc finger protein 781	331188	Chr10	-	81.9021	81.911	UNC18256994	Chr10	76.2415	71.3574	82.8756	7.87719	8.47268	Trans
17243475	LOC102635990	uncharacterized LOC102635990	102635990	Chr10	-	82.2818	82.2862	UNC18129576	Chr10	66.2584	63.8286	88.7189	8.19488	8.54361	Trans
17243525	Slc41a2	solute carrier family 41, member 2	338365	Chr10	-	83.2309	83.3379	JAX00294304	Chr10	84.5537	83.3138	84.5537	7.54579	16.2327	Cis
17243544	Aldh1l2	aldehyde dehydrogenase 1 family, member L2	216188	Chr10	-	83.4894	83.534	UNC14513640	Chr8	36.5835	29.0355	41.1434	7.69864	7.78983	Trans
17243576	Appl2	adaptor protein, phosphotyrosine interaction, PH domain and leucine zipper containing 2	216190	Chr10	-	83.6006	83.6487	UNC18382926	Chr10	88.2234	83.0334	90.2267	8.7927	10.767	Trans
17243638	Mterf2	mitochondrial transcription termination factor 2	74238	Chr10	-	85.1194	85.128	UNC18345226	Chr10	84.8406	83.0882	87.5404	7.66242	10.6091	Cis
17243763	Stab2	stabilin 2	192188	Chr10	-	86.8413	87.0079	UNC18164376	Chr10	68.9253	63.9335	114.764	7.89268	8.07531	Trans
17244085	Slc17a8	solute carrier family 17 (sodium-dependent inorganic phosphate cotransporter), member 8	216227	Chr10	-	89.576	89.6212	UNC29577452	Chr18	72.8213	71.6283	73.342	7.8271	7.95616	Trans
17244217	Rmst	rhabdomyosarcoma 2 associated transcript (non-coding RNA)	110333	Chr10	-	92.0821	92.1652	UNC23804378	Chr14	32.3476	29.9144	33.8928	8.09264	8.28095	Trans
17244263	Cfap54	cilia and flagella associated protein 54	380654	Chr10	-	92.7756	93.0815	JAX00587105	Chr5	80.6693	73.3027	80.6693	7.92834	8.47236	Trans
17244263	Cfap54	cilia and flagella associated protein 54	380654	Chr10	-	92.7756	93.0815	UNC18449574	Chr10	93.1789	92.5174	93.2527	7.92834	14.5667	Cis
17244378	Metap2	methionine aminopeptidase 2	56307	Chr10	-	93.8604	93.8912	UNC20524102	Chr11	120.261	119.106	120.501	7.73974	7.78561	Trans
17244435	Cep83os	centrosomal protein 83, opposite strand	67723	Chr10	-	94.6739	94.6886	JAX00021110	Chr10	94.7894	94.4766	95.1713	7.71805	13.5337	Cis
17244476	Cradd	CASP2 and RIPK1 domain containing adaptor with death domain	12905	Chr10	-	95.1749	95.3241	UNC18480077	Chr10	95.1177	93.3394	96.2083	10.1265	11.9905	Cis
17244486	Socs2	suppressor of cytokine signaling 2	216233	Chr10	-	95.3863	95.4172	UNC5614480	Chr3	79.8777	75.2055	80.4382	7.73503	7.81602	Trans
17244506	Mrpl42	mitochondrial ribosomal protein L42	67270	Chr10	-	95.4808	95.5005	UNC18480813	Chr10	95.1713	95.0027	96.1808	11.5967	19.1931	Cis
17244572	Tmtc3	transmembrane and tetratricopeptide repeat containing 3	237500	Chr10	-	100.446	100.487	UNC18621671	Chr10	104.948	99.2818	105.536	7.8116	8.01102	Trans
17244608	Alx1	ALX homeobox 1	216285	Chr10	-	103.008	103.029	UNC2799263	Chr2	28.7033	22.7784	29.7888	8.50312	8.52412	Trans
17244661	Tmtc2	transmembrane and tetratricopeptide repeat containing 2	278279	Chr10	-	105.19	105.574	UNC18542519	Chr10	99.7471	96.8483	105.739	7.79827	8.29052	Trans
17244705	Acss3	acyl-CoA synthetase short-chain family member 3	380660	Chr10	-	106.937	107.124	UNC18656908	Chr10	107.173	106.031	110.115	8.08653	10.1164	Cis
17244843	Syt1	synaptotagmin I	20979	Chr10	-	108.498	109.011	UNC16154532	Chr9	35.4837	34.9886	36.9862	7.62268	8.55019	Trans
17244843	Syt1	synaptotagmin I	20979	Chr10	-	108.498	109.011	UNC100187548	Chr10	107.484	107.338	109.402	7.62268	13.9359	Cis
17244937	4933440J02Rik	RIKEN cDNA 4933440J02 gene	71321	Chr10	-	111.587	111.594	UNC18721427	Chr10	111.548	110.645	111.786	7.99875	11.1006	Cis
17244967	Atxn7l3b	ataxin 7-like 3B	382423	Chr10	-	112.926	112.929	UNC2883726	Chr2	36.8295	36.8295	36.8449	9.54926	15.8113	Trans
17244967	Atxn7l3b	ataxin 7-like 3B	382423	Chr10	-	112.926	112.929	UNC18756231	Chr10	114.064	112.4	114.154	9.54926	19.1386	Cis
17245152	Rab3ip	RAB3A interacting protein	216363	Chr10	-	116.906	116.939	UNC20861037	Chr12	33.2914	30.3123	33.9154	7.81239	8.6177	Trans
17245202	Yeats4	YEATS domain containing 4	64050	Chr10	-	117.215	117.224	UNC18810687	Chr10	117.801	115.826	118.287	7.69509	10.4438	Cis
17245433	Msrb3	methionine sulfoxide reductase B3	320183	Chr10	-	120.782	120.899	UNC18856683	Chr10	120.898	120.601	125.496	7.89431	9.64878	Cis
17245466	Tbc1d30	TBC1 domain family, member 30	74694	Chr10	-	121.264	121.311	UNC100262958	Chr10	121.461	120.844	121.875	7.59731	10.2132	Cis
17245481	Rassf3	Ras association (RalGDS/AF-6) domain family member 3	192678	Chr10	-	121.41	121.476	UNC18868589	Chr10	121.66	121.152	125.026	7.5295	14.4186	Cis
17245587	Mon2	MON2 homolog, regulator of endosome to Golgi trafficking	67074	Chr10	-	122.994	123.076	UNC101378698	Chr10	123.556	121.789	123.729	10.1109	12.5587	Cis
17245785	Pip4k2c	phosphatidylinositol-5-phosphate 4-kinase, type II, gamma	117150	Chr10	-	127.198	127.212	UNC18961845	Chr10	127.613	127.166	127.613	8.1767	10.91	Cis
17245831	Mbd6	methyl-CpG binding domain protein 6	110962	Chr10	-	127.282	127.289	UNC25864892	Chr15	72.4021	68.4619	72.5187	7.77029	8.51533	Trans
17246337	Tmem198b	transmembrane protein 198b	73827	Chr10	-	128.8	128.804	UNC070790469	Chr7	28.8955	28.1192	29.6428	7.77008	8.11088	Trans
17246593	8430429K09Rik	RIKEN cDNA 8430429K09 gene	71523	Chr11	+	3.45238	3.47978	JAX00302717	Chr11	3.58046	3.26387	5.08898	7.90104	10.0354	Cis
17246613	Selenom	selenoprotein M	114679	Chr11	+	3.51472	3.51729	CEAJAX00023804	Chr11	3.39831	3.26387	3.82921	7.77373	17.2957	Cis
17246825	Ascc2	activating signal cointegrator 1 complex subunit 2	75452	Chr11	+	4.64043	4.68562	JAX00023857	Chr11	4.13987	4.11227	4.88495	7.66243	10.3144	Cis
17247183	Adcy1	adenylate cyclase 1	432530	Chr11	+	7.06417	7.17193	UNC19016438	Chr11	6.72647	6.60637	7.58313	7.67896	20.2484	Cis
17247215	Gm11992	predicted gene 11992	626870	Chr11	+	9.04864	9.06916	UNC19051789	Chr11	9.13397	8.54491	9.17344	7.79535	7.99301	Cis
17247241	Abca13	ATP-binding cassette, sub-family A (ABC1), member 13	268379	Chr11	+	9.19346	9.68412	JAX00303739	Chr11	9.17344	9.01927	9.17344	11.0506	18.0896	Cis
17247377	Vstm2a	V-set and transmembrane domain containing 2A	211739	Chr11	+	16.2578	16.4269	UNC19134009	Chr11	14.746	12.6559	16.8206	7.52953	21.5013	Cis
17248191	Gpr75	G protein-coupled receptor 75	237716	Chr11	+	30.8854	30.8935	UNC19319245	Chr11	28.914	28.914	32.3303	7.72059	13.3122	Cis
17248231	Nsg2	neuron specific gene family member 2	18197	Chr11	+	32.0005	32.0589	UNC19362074	Chr11	32.3303	31.6057	33.614	7.90015	11.7326	Cis
17248242	Snrnp25	small nuclear ribonucleoprotein 25 (U11/U12)	78372	Chr11	+	32.2054	32.2089	UNC19353831	Chr11	31.7701	28.914	32.2938	7.61599	9.53771	Cis
17248406	Gm12121	predicted gene 12121	102640720	Chr11	+	34.1418	34.1434	UNC19367281	Chr11	32.7957	32.376	35.1961	7.5592	10.4808	Cis
17248654	Il12b	interleukin 12b	16160	Chr11	+	44.4001	44.4136	UNC19550185	Chr11	46.3373	44.1795	46.6536	7.85142	14.5054	Cis
17248728	Clint1	clathrin interactor 1	216705	Chr11	+	45.852	45.9101	JAX00026957	Chr11	45.9255	44.3736	48.0453	8.07672	9.5305	Cis
17248847	Havcr1	hepatitis A virus cellular receptor 1	171283	Chr11	+	46.7351	46.7791	UNC19558695	Chr11	46.8743	46.7416	46.9562	7.73508	19.9197	Cis
17248957	Olfr1392	olfactory receptor 1392	258462	Chr11	+	49.2933	49.2943	JAX00310397	Chr11	49.1152	48.4509	49.7947	7.56167	9.78408	Cis
17249151	Mgat4b	mannoside acetylglucosaminyltransferase 4, isoenzyme B	103534	Chr11	+	50.211	50.2349	UNC19596404	Chr11	50.1558	49.8395	51.3294	8.54247	12.835	Cis
17249262	Zfp354a	zinc finger protein 354A	21408	Chr11	+	51.0593	51.0727	UNC111342185	Chr11	60.7283	49.1152	61.1898	8.21238	8.377	Trans
17249355	D930048N14Rik	RIKEN cDNA D930048N14 gene	97775	Chr11	+	51.651	51.6567	UNC19619972	Chr11	51.7946	49.1152	54.3188	8.21103	11.1474	Cis
17249780	Hint1	histidine triad nucleotide binding protein 1	15254	Chr11	+	54.8665	54.8705	UNC19648088	Chr11	53.9856	53.9856	55.1061	7.90166	14.537	Cis
17249811	Slc36a1	solute carrier family 36 (proton/amino acid symporter), member 1	215335	Chr11	+	55.2044	55.2338	UNC19691019	Chr11	56.9862	54.2524	59.1181	7.8079	7.9636	Cis
17249918	Sap30l	SAP30-like	50724	Chr11	+	57.8022	57.8105	UNC19687587	Chr11	56.782	56.2132	58.5013	7.83227	8.00712	Cis
17250307	Nt5m	5',3'-nucleotidase, mitochondrial	103850	Chr11	+	59.8396	59.8799	UNC19710298	Chr11	58.1956	56.9862	60.8629	7.75417	8.38131	Cis
17250530	Gm26534	predicted gene, 26534	102639276	Chr11	+	60.8791	60.8872	UNC19790526	Chr11	64.2286	60.2018	64.5506	8.20635	8.28895	Trans
17250597	B9d1	B9 protein domain 1	27078	Chr11	+	61.5051	61.5129	UNC19772765	Chr11	63.0819	61.5063	63.162	7.50134	19.8385	Cis
17250615	Grap	GRB2-related adaptor protein	71520	Chr11	+	61.6533	61.6722	JAX00639549	Chr7	53.926	53.7516	55.1238	7.85013	9.16495	Trans
17250660	Adora2b	adenosine A2b receptor	11541	Chr11	+	62.249	62.2663	UNC19751789	Chr11	61.381	61.381	62.8536	7.7725	7.77893	Cis
17250660	Adora2b	adenosine A2b receptor	11541	Chr11	+	62.249	62.2663	UNC3981251	Chr2	131.788	129.657	132.159	7.7725	7.77785	Trans
17250740	Snord49b	small nucleolar RNA, C/D box 49B	100217426	Chr11	+	62.6031	62.6031	UNC19772591	Chr11	63.061	60.987	64.6349	7.70369	16.1331	Cis
17250755	Mmgt2	membrane magnesium transporter 2	216829	Chr11	+	62.6488	62.666	UNC21864475	Chr12	109.121	108.99	109.512	7.78344	8.26564	Trans
17250775	Trim16	tripartite motif-containing 16	94092	Chr11	+	62.8203	62.8423	UNC19751981	Chr11	61.3991	61.381	62.9234	7.93319	8.82649	Cis
17250790	Fbxw10	F-box and WD-40 domain protein 10	213980	Chr11	+	62.8471	62.8774	UNC19762072	Chr11	62.2796	62.2639	62.8536	7.65218	21.7876	Cis
17250938	Tmem220	transmembrane protein 220	338369	Chr11	+	67.0252	67.0353	UNC19835870	Chr11	67.1969	64.9375	67.2555	7.84514	9.26177	Cis
17251370	Myh10	myosin, heavy polypeptide 10, non-muscle	77579	Chr11	+	68.692	68.8159	UNC19864128	Chr11	69.0469	67.3388	69.0824	8.02213	10.4959	Cis
17251677	Sat2	spermidine/spermine N1-acetyl transferase 2	69215	Chr11	+	69.622	69.6238	UNC19871311	Chr11	69.7592	69.59	69.8058	8.61277	13.3698	Cis
17251816	Ybx2	Y box protein 2	53422	Chr11	+	69.9358	69.9416	UNC19904471	Chr11	72.9525	71.9794	75.2109	7.66424	8.24116	Trans
17251933	Asgr1	asialoglycoprotein receptor 1	11889	Chr11	+	70.0541	70.0578	UNC19887768	Chr11	71.3993	69.8561	72.4255	7.80389	16.4331	Cis
17252058	Tm4sf5	transmembrane 4 superfamily member 5	75604	Chr11	+	70.5053	70.5111	UNC19890597	Chr11	71.5853	69.8561	72.4152	7.78721	46.6523	Cis
17252200	Kif1c	kinesin family member 1C	16562	Chr11	+	70.7006	70.7287	UNC19871625	Chr11	69.8262	69.8211	72.4152	7.75979	12.2414	Cis
17252256	Rpain	RPA interacting protein	69723	Chr11	+	70.9703	70.9778	JAX00314707	Chr11	69.8211	69.8211	72.4255	7.56716	16.1866	Cis
17252292	Wscd1	WSC domain containing 1	216881	Chr11	+	71.75	71.7895	UNC19888318	Chr11	71.4341	69.8561	72.6532	7.80295	7.8533	Cis
17252341	Xaf1	XIAP associated factor 1	327959	Chr11	+	72.3017	72.3134	UNC19899978	Chr11	72.3036	71.7342	72.6775	7.59817	12.8871	Cis
17252359	Ggt6	gamma-glutamyltransferase 6	71522	Chr11	+	72.4356	72.4385	UNC30063356	Chr19	22.4346	22.2297	22.618	7.79237	8.59612	Trans
17252726	Olfr397	olfactory receptor 397	258343	Chr11	+	73.9645	73.9656	UNC8963497	Chr5	36.7706	36.1523	36.9078	8.29558	10.0997	Trans
17253145	Dbil5	diazepam binding inhibitor-like 5	13168	Chr11	+	76.2176	76.2187	JAX00548393	Chr4	36.5485	35.4715	97.1295	7.85431	8.58426	Trans
17253297	Abhd15	abhydrolase domain containing 15	67477	Chr11	+	77.5151	77.5386	UNC20561450	Chr12	5.29143	5.00164	5.88566	7.86793	7.95612	Trans
17253452	Fam222b	family with sequence similarity 222, member B	216971	Chr11	+	78.0947	78.1571	UNC29461276	Chr18	65.528	65.4423	66.0458	7.74004	8.01025	Trans
17253478	Rab34	RAB34, member RAS oncogene family	19376	Chr11	+	78.1885	78.1921	UNC19941851	Chr11	76.6791	75.3374	76.7602	7.69361	12.1374	Cis
17253599	Aldoc	aldolase C, fructose-bisphosphate	11676	Chr11	+	78.323	78.3272	UNC19952024	Chr11	77.7375	76.9248	78.9637	7.71581	13.8603	Cis
17253688	Ift20	intraflagellar transport 20	55978	Chr11	+	78.5364	78.5417	JAX00029397	Chr11	79.0514	78.1131	79.9658	8.2203	13.4531	Cis
17253885	Adap2	ArfGAP with dual PH domains 2	216991	Chr11	+	80.1541	80.1785	JAX00316215	Chr11	80.6176	80.0131	81.5231	8.11924	8.97146	Cis
17254089	Zfp830	zinc finger protein 830	66983	Chr11	+	82.7643	82.7676	UNC20012954	Chr11	82.6365	82.4472	83.8037	7.72537	10.0838	Cis
17254093	Lig3	ligase III, DNA, ATP-dependent	16882	Chr11	+	82.7835	82.804	UNC20024454	Chr11	83.5777	82.6619	83.5777	7.57812	13.9286	Cis
17254188	Slfn3	schlafen 3	20557	Chr11	+	83.2126	83.2151	JAX00029630	Chr11	82.1786	81.8773	83.8618	7.72044	8.05592	Cis
17254202	AA465934	expressed sequence AA465934	613254	Chr11	+	83.2918	83.2949	UNC20030204	Chr11	83.9608	82.4678	85.1407	7.63269	10.9321	Cis
17254305	Heatr6	HEAT repeat containing 6	217026	Chr11	+	83.7536	83.7828	UNC23945716	Chr14	46.0421	37.9048	46.3635	8.01455	8.79854	Trans
17254473	Myo19	myosin XIX	66196	Chr11	+	84.8802	84.9112	UNC20023269	Chr11	83.4844	81.8802	85.5948	7.5868	10.703	Cis
17254532	Appbp2os	amyloid beta precursor protein (cytoplasmic tail) binding protein 2, opposite strand	654810	Chr11	+	85.2352	85.2382	UNC20044447	Chr11	85.3937	83.7492	85.7167	7.80174	10.265	Cis
17255002	Scpep1os	serine carboxypeptidase 1, opposite strand	73921	Chr11	+	88.906	88.936	UNC30107716	Chr19	25.1299	23.1859	25.5309	7.86147	8.56062	Trans
17255202	B230206L02Rik	RIKEN cDNA B230206L02 gene	100039440	Chr11	+	94.1357	94.1557	UNC20163571	Chr11	94.0485	93.6749	94.7012	7.65015	14.1615	Cis
17255232	Lrrc59	leucine rich repeat containing 59	98238	Chr11	+	94.6299	94.6445	UNC20146066	Chr11	92.9011	92.272	94.7542	8.53895	9.72408	Cis
17255335	Samd14	sterile alpha motif domain containing 14	217125	Chr11	+	95.0099	95.0259	UNC20172523	Chr11	94.7937	94.7542	95.7685	7.67046	9.71359	Cis
17255540	Gm11538	predicted gene 11538	432593	Chr11	+	96.2035	96.2053	JAX00716589	ChrX	101.281	88.6275	129.789	7.9282	8.53634	Trans
17255543	Gm53	predicted gene 53	193022	Chr11	+	96.2511	96.2649	UNC20191482	Chr11	96.3257	95.2909	97.8457	7.77251	12.4118	Cis
17255588	Hoxb5	homeobox B5	15413	Chr11	+	96.3027	96.306	UNC10052166	Chr5	122.068	120.746	122.169	7.80364	8.58675	Trans
17255663	Copz2	coatomer protein complex, subunit zeta 2	56358	Chr11	+	96.85	96.8611	UNC20197962	Chr11	96.8274	96.6458	97.027	7.74924	19.9408	Cis
17255691	Prr15l	proline rich 15-like	217138	Chr11	+	96.9281	96.9376	UNC13660290	Chr7	114.64	113.845	116.247	7.7626	8.06515	Trans
17255708	Scrn2	secernin 2	217140	Chr11	+	97.03	97.0339	UNC20200875	Chr11	97.0398	96.9726	98.5937	7.88247	13.3305	Cis
17255719	Mrpl10	mitochondrial ribosomal protein L10	107732	Chr11	+	97.0416	97.0488	UNC20210147	Chr11	97.8457	96.9726	98.5663	8.33212	10.9057	Cis
17255759	Gm11592	predicted gene 11592	102632994	Chr11	+	97.2809	97.2828	UNC20200875	Chr11	97.0398	96.6458	99.1167	7.72053	10.0898	Cis
17255775	Socs7	suppressor of cytokine signaling 7	192157	Chr11	+	97.3631	97.3968	UNC20210147	Chr11	97.8457	97.4346	99.1167	8.05923	8.47506	Cis
17255999	Erbb2	erb-b2 receptor tyrosine kinase 2	13866	Chr11	+	98.4125	98.4369	UNC18537667	Chr10	99.4073	97.0095	100.449	8.01833	8.02217	Trans
17256113	Psmd3	proteasome (prosome, macropain) 26S subunit, non-ATPase, 3	22123	Chr11	+	98.6826	98.6958	UNC20225439	Chr11	99.196	97.5409	100.097	7.81501	9.57417	Cis
17256365	Fkbp10	FK506 binding protein 10	14230	Chr11	+	100.416	100.425	UNC040513634	Chr4	59.7318	58.8313	78.2532	7.84234	8.03713	Trans
17256414	Nkiras2	NFKB inhibitor interacting Ras-like protein 2	71966	Chr11	+	100.619	100.627	UNC20238503	Chr11	100.097	99.501	101.047	8.41572	12.0836	Cis
17256502	Naglu	alpha-N-acetylglucosaminidase (Sanfilippo disease IIIB)	27419	Chr11	+	101.07	101.078	UNC14172771	Chr8	12.2107	10.0317	13.0312	7.83626	8.49629	Trans
17256502	Naglu	alpha-N-acetylglucosaminidase (Sanfilippo disease IIIB)	27419	Chr11	+	101.07	101.078	JAX00319977	Chr11	100.514	100.097	101.103	7.83626	8.8818	Cis
17256513	Hsd17b1	hydroxysteroid (17-beta) dehydrogenase 1	15485	Chr11	+	101.078	101.08	UNC20270670	Chr11	102.698	99.9386	102.844	7.69045	7.71332	Cis
17256549	Tubg1	tubulin, gamma 1	103733	Chr11	+	101.12	101.126	UNC17200783	Chr9	116.168	115.97	116.819	7.65621	8.05354	Trans
17256632	Wnk4	WNK lysine deficient protein kinase 4	69847	Chr11	+	101.261	101.277	UNC4014466	Chr2	134.174	125.985	135.647	7.83885	7.97658	Trans
17256691	Aoc2	amine oxidase, copper containing 2 (retina-specific)	237940	Chr11	+	101.325	101.329	UNC20206486	Chr11	97.5409	96.7403	97.9293	7.77066	8.8362	Trans
17256754	Nbr1	neighbor of Brca1 gene 1	17966	Chr11	+	101.552	101.582	JAX00031067	Chr11	101.373	100.841	101.626	7.66146	9.09388	Cis
17256784	Tmem106a	transmembrane protein 106A	217203	Chr11	+	101.582	101.591	UNC20270826	Chr11	102.722	99.3639	104.139	7.69556	9.29103	Cis
17256882	Nags	N-acetylglutamate synthase	217214	Chr11	+	102.146	102.149	UNC20257407	Chr11	101.626	100.146	102.722	7.50768	8.94061	Cis
17256991	Adam11	a disintegrin and metallopeptidase domain 11	11488	Chr11	+	102.762	102.78	UNC20271502	Chr11	102.762	102.433	103.73	7.48467	18.6759	Cis
17257146	Rprml	reprimo-like	104582	Chr11	+	103.65	103.651	UNC29596357	Chr18	74.0211	74.0211	74.4488	8.24206	10.1721	Trans
17257150	C130046K22Rik	RIKEN cDNA C130046K22 gene	399609	Chr11	+	103.703	103.723	UNC20281801	Chr11	103.577	103.031	103.742	7.89034	24.526	Cis
17257331	Tlk2	tousled-like kinase 2 (Arabidopsis)	24086	Chr11	+	105.179	105.283	UNC20303462	Chr11	105.151	103.937	105.504	9.07836	12.487	Cis
17257405	Tanc2	tetratricopeptide repeat, ankyrin repeat and coiled-coil containing 2	77097	Chr11	+	105.59	105.924	UNC20316660	Chr11	106.474	104.187	107.92	7.59183	9.61054	Cis
17257492	Dcaf7	DDB1 and CUL4 associated factor 7	71833	Chr11	+	106.037	106.059	UNC20313313	Chr11	106.158	103.147	106.601	7.77363	10.3597	Cis
17257743	Apoh	apolipoprotein H	11818	Chr11	+	108.343	108.414	UNC9709136	Chr5	93.282	93.0151	96.3552	7.66708	8.38615	Trans
17257743	Apoh	apolipoprotein H	11818	Chr11	+	108.343	108.414	JAX00321296	Chr11	108.185	108.092	109.554	7.66708	11.2736	Cis
17257760	Cep112	centrosomal protein 112	76380	Chr11	+	108.425	108.861	UNC100020956	Chr10	15.2924	13.6504	15.8054	7.42592	7.50503	Trans
17257760	Cep112	centrosomal protein 112	76380	Chr11	+	108.425	108.861	JAX00031665	Chr11	109.368	107.936	109.376	7.42592	8.09065	Cis
17257871	Gm11685	predicted gene 11685	102631572	Chr11	+	109.616	109.642	UNC664379	Chr1	51.968	51.8781	54.4473	8.05313	8.08287	Trans
17257906	Map2k6	mitogen-activated protein kinase kinase 6	26399	Chr11	+	110.399	110.525	UNC26480144	Chr16	23.663	22.8196	24.3739	7.67737	9.53348	Trans
17257928	Kcnj16	potassium inwardly-rectifying channel, subfamily J, member 16	16517	Chr11	+	110.968	111.027	JAX00321662	Chr11	110.854	110.712	110.95	7.77662	20.0052	Cis
17257937	Kcnj2	potassium inwardly-rectifying channel, subfamily J, member 2	16518	Chr11	+	111.066	111.077	UNC110177474	Chr11	110.605	110.238	112.17	7.83862	14.8056	Cis
17258220	Slc16a5	solute carrier family 16 (monocarboxylic acid transporters), member 5	217316	Chr11	+	115.463	115.474	UNC20460357	Chr11	115.351	115.248	116.217	7.99811	10.0425	Cis
17258374	Myo15b	myosin XVB	217328	Chr11	+	115.859	115.892	UNC110187063	Chr11	116.307	114.738	116.396	7.53191	8.4222	Cis
17258444	Smim5	small integral membrane protein 5	66528	Chr11	+	115.9	115.906	JAX00322333	Chr11	113.884	112.575	115.351	7.83039	9.49302	Trans
17258451	Smim6	small integral membrane protein 6	68528	Chr11	+	115.912	115.914	UNC20474477	Chr11	116.481	115.409	116.528	7.53396	13.4482	Cis
17258547	Ten1	TEN1 telomerase capping complex subunit	69535	Chr11	+	116.199	116.215	JAX00032185	Chr11	116.305	115.49	116.307	7.69008	14.1669	Cis
17258644	BC018473	cDNA sequence BC018473	193217	Chr11	+	116.752	116.759	UNC20477131	Chr11	116.694	116.685	116.957	7.86327	29.624	Cis
17258653	Mettl23	methyltransferase like 23	74319	Chr11	+	116.844	116.854	UNC20477253	Chr11	116.707	116.566	117.581	7.7614	8.44691	Cis
17258714	Sec14l1	SEC14-like lipid binding 1	74136	Chr11	+	117.115	117.159	UNC20482980	Chr11	117.093	116.694	117.506	7.80417	12.1081	Cis
17258765	Gm11732	predicted gene 11732	102637448	Chr11	+	117.426	117.439	UNC21398613	Chr12	73.6181	72.4024	73.6416	7.8094	8.40192	Trans
17258842	Syngr2	synaptogyrin 2	20973	Chr11	+	117.81	117.814	UNC110426222	Chr11	118.277	117.559	118.53	7.63402	8.52122	Cis
17258994	Gaa	glucosidase, alpha, acid	14387	Chr11	+	119.268	119.285	UNC20518156	Chr11	119.709	117.545	120.309	7.82593	9.16501	Cis
17259430	Npb	neuropeptide B	208990	Chr11	+	120.609	120.609	UNC510316	Chr1	40.4905	37.6392	42.0265	7.75389	8.13715	Trans
17259563	Hexdc	hexosaminidase (glycosyl hydrolase family 20, catalytic domain) containing	238023	Chr11	+	121.205	121.223	UNC110194536	Chr11	121.946	121.075	121.977	7.79238	11.2107	Cis
17259702	Sfi1	Sfi1 homolog, spindle assembly associated (yeast)	78887	Chr11	-	3.13187	3.18899	UNC22777815	Chr13	67.7623	64.8974	69.3752	7.78433	9.39336	Trans
17259794	Rnf185	ring finger protein 185	193670	Chr11	-	3.41546	3.45235	UNC19005983	Chr11	5.53415	3.26387	7.19111	7.74161	7.92053	Trans
17259956	Ccdc157	coiled-coil domain containing 157	216516	Chr11	-	4.14323	4.16024	UNC18994955	Chr11	4.14487	4.04852	7.13017	7.9329	9.9286	Cis
17260023	Uqcr10	ubiquinol-cytochrome c reductase, complex III subunit X	66152	Chr11	-	4.70197	4.70404	UNC18997702	Chr11	4.51708	3.92361	5.63863	7.86247	14.0134	Cis
17260261	Camk2b	calcium/calmodulin-dependent protein kinase II, beta	12323	Chr11	-	5.96984	6.06628	UNC19012055	Chr11	6.18182	4.63738	8.47822	7.8106	10.7369	Cis
17260474	Igfbp3	insulin-like growth factor binding protein 3	16009	Chr11	-	7.20651	7.21366	JAX00024099	Chr11	7.37337	6.69497	8.37547	7.9106	8.11956	Cis
17260590	Sun3	Sad1 and UNC84 domain containing 3	194974	Chr11	-	9.0161	9.04895	UNC080440907	Chr8	26.3842	24.3794	31.1068	7.68472	8.30197	Trans
17260644	Ddc	dopa decarboxylase	13195	Chr11	-	11.8142	11.8981	UNC19089097	Chr11	11.6243	11.1132	16.014	7.82884	14.0447	Cis
17260916	Ugp2	UDP-glucose pyrophosphorylase 2	216558	Chr11	-	21.3214	21.3711	JAX00025170	Chr11	21.7631	21.1957	22.9093	9.07661	14.0485	Cis
17260944	Mdh1	malate dehydrogenase 1, NAD (soluble)	17449	Chr11	-	21.5574	21.5723	UNC26484949	Chr16	24.035	23.5981	24.353	9.33166	10.987	Trans
17261289	Eml6	echinoderm microtubule associated protein like 6	237711	Chr11	-	29.7463	30.0259	UNC19322866	Chr11	29.319	29.1782	29.9878	7.80421	21.577	Cis
17261393	Acyp2	acylphosphatase 2, muscle type	75572	Chr11	-	30.5061	30.6495	UNC19273162	Chr11	25.3415	24.3061	26.6847	8.05519	10.2765	Trans
17261446	D630024D03Rik	RIKEN cDNA D630024D03 gene	414116	Chr11	-	31.7903	31.8245	UNC19351705	Chr11	31.6412	30.452	32.6097	7.88481	12.7034	Cis
17261575	Ranbp17	RAN binding protein 17	66011	Chr11	-	33.2127	33.5131	UNC19377837	Chr11	33.6676	32.4719	37.7256	7.63117	8.9284	Cis
17261944	Pttg1	pituitary tumor-transforming gene 1	30939	Chr11	-	43.4203	43.4262	UNC19507984	Chr11	43.4512	43.3035	43.6838	7.33971	22.98	Cis
17262032	Thg1l	tRNA-histidine guanylyltransferase 1-like (S. cerevisiae)	66628	Chr11	-	45.947	45.9555	UNC12012246	Chr6	124.499	122.862	124.588	7.74472	8.81399	Trans
17262202	Irgm1	immunity-related GTPase family M member 1	15944	Chr11	-	48.8635	48.8717	UNC19578403	Chr11	48.3445	47.2989	48.834	7.87108	8.41776	Cis
17262241	9930111J21Rik2	RIKEN cDNA 9930111J21 gene 2	245240	Chr11	-	49.0162	49.0204	UNC19580406	Chr11	48.5212	48.4509	48.834	8.19995	25.1998	Cis
17262255	Olfr1396	olfactory receptor 1396	258334	Chr11	-	49.1128	49.1149	UNC19580406	Chr11	48.5212	48.2966	48.834	7.86588	11.9177	Cis
17262316	Ltc4s	leukotriene C4 synthase	17001	Chr11	-	50.2365	50.2385	UNC19604855	Chr11	50.7846	50.2454	53.7205	7.67741	8.93409	Cis
17262357	Rufy1	RUN and FYVE domain containing 1	216724	Chr11	-	50.3895	50.431	UNC30666893	ChrX	13.4072	12.4435	22.139	7.61824	8.06713	Trans
17262357	Rufy1	RUN and FYVE domain containing 1	216724	Chr11	-	50.3895	50.431	UNC19614765	Chr11	51.4044	50.3031	51.544	7.61824	12.6523	Cis
17262471	BC049762	cDNA sequence BC049762	193286	Chr11	-	51.2538	51.263	UNC19598538	Chr11	50.3611	49.9765	51.5219	7.82368	8.96231	Cis
17262521	Sec24a	Sec24 related gene family, member A (S. cerevisiae)	77371	Chr11	-	51.6932	51.7568	UNC19617247	Chr11	51.544	50.7846	53.7615	7.71804	8.51464	Cis
17262596	Olfr1372-ps1	olfactory receptor 1372, pseudogene 1	257871	Chr11	-	52.1549	52.1565	JAX00310919	Chr11	51.9928	51.9694	52.6544	6.96353	11.3333	Cis
17262600	Tcf7	transcription factor 7, T cell specific	21414	Chr11	-	52.2525	52.283	UNC25614010	Chr15	53.9958	53.9617	54.0225	21.2678	22.0596	Trans
17262740	Gm12216	predicted gene 12216	622459	Chr11	-	53.7834	53.8592	UNC19661582	Chr11	55.1448	53.8491	57.4438	7.59725	11.25	Cis
17262798	Pdlim4	PDZ and LIM domain 4	30794	Chr11	-	54.055	54.069	UNC30040019	Chr19	21.244	21.038	22.0175	7.69321	8.87801	Trans
17262848	Lyrm7	LYR motif containing 7	75530	Chr11	-	54.8396	54.8606	UNC110202694	Chr11	55.9176	54.3753	56.1688	7.52625	28.3527	Cis
17262855	Tnip1	TNFAIP3 interacting protein 1	57783	Chr11	-	54.9108	54.9629	UNC19691019	Chr11	56.9862	53.9856	57.3091	7.60976	17.3697	Trans
17263089	Gemin5	gem nuclear organelle associated protein 5	216766	Chr11	-	58.1217	58.1685	UNC19689773	Chr11	56.9229	55.2865	59.2067	7.71915	7.77837	Cis
17263200	Zfp39	zinc finger protein 39	22698	Chr11	-	58.8882	58.9042	UNC19729035	Chr11	59.4849	58.5954	60.0228	7.65042	13.5193	Cis
17263362	Guk1	guanylate kinase 1	14923	Chr11	-	59.1839	59.1922	UNC19719893	Chr11	58.8437	58.1609	69.0469	7.58041	8.77332	Cis
17263374	2610507I01Rik	RIKEN cDNA 2610507I01 gene	72203	Chr11	-	59.1983	59.2024	UNC19725928	Chr11	59.2067	59.1774	59.4849	7.3824	35.8417	Cis
17263401	Snap47	synaptosomal-associated protein, 47	67826	Chr11	-	59.4072	59.4511	UNC19729035	Chr11	59.4849	59.1774	59.9262	8.14847	12.6269	Cis
17263463	Flcn	folliculin	216805	Chr11	-	59.7914	59.81	UNC19734987	Chr11	59.9262	59.2517	60.0929	7.7171	9.20525	Cis
17263482	Cops3	COP9 signalosome subunit 3	26572	Chr11	-	59.818	59.8398	UNC19751789	Chr11	61.381	59.2517	63.0711	7.7584	10.0926	Cis
17263673	Shmt1	serine hydroxymethyltransferase 1 (soluble)	20425	Chr11	-	60.7884	60.8116	UNC19710298	Chr11	58.1956	57.9303	61.327	8.06923	12.2208	Trans
17263744	Slc47a2	solute carrier family 47, member 2	380701	Chr11	-	61.3017	61.3428	JAX00312934	Chr11	61.3164	60.7994	64.8058	7.52825	14.7692	Cis
17263765	Slc47a1	solute carrier family 47, member 1	67473	Chr11	-	61.3435	61.3783	UNC19748620	Chr11	61.1551	60.8629	61.327	8.09108	10.8998	Cis
17263877	Prpsap2	phosphoribosyl pyrophosphate synthetase-associated protein 2	212627	Chr11	-	61.7297	61.7621	UNC19751981	Chr11	61.3991	61.381	62.9234	7.72305	11.3711	Cis
17263929	Akap10	A kinase (PRKA) anchor protein 10	56697	Chr11	-	61.8725	61.9302	UNC19742629	Chr11	60.6945	60.0929	61.327	7.86574	9.31875	Cis
17264124	Arhgap44	Rho GTPase activating protein 44	216831	Chr11	-	65.0032	65.1627	UNC19801560	Chr11	64.8752	64.6612	65.2228	7.70402	24.2932	Cis
17264282	Shisa6	shisa family member 6	380702	Chr11	-	66.2144	66.5258	UNC29724845	Chr18	82.5678	81.6014	83.6285	7.78597	8.04365	Trans
17264884	Tnfsfm13	tumor necrosis factor (ligand) superfamily, membrane-bound member 13	619441	Chr11	-	69.6827	69.6961	UNC19870031	Chr11	69.59	69.325	69.7592	7.80431	15.7239	Cis
17264996	Tnk1	tyrosine kinase, non-receptor, 1	83813	Chr11	-	69.8509	69.8587	UNC19893239	Chr11	71.7342	69.8211	73.1244	7.69985	13.0045	Cis
17265019	Tmem95	transmembrane protein 95	100503361	Chr11	-	69.8768	69.878	UNC19896123	Chr11	71.9337	70.0678	72.995	7.72185	8.17188	Trans
17265062	2810408A11Rik	RIKEN cDNA 2810408A11 gene	70419	Chr11	-	69.8974	69.9009	UNC19880825	Chr11	70.8088	19.726	72.5565	7.55843	7.73398	Cis
17265111	Elp5	elongator acetyltransferase complex subunit 5	54351	Chr11	-	69.9683	69.9825	UNC26570985	Chr16	29.8802	29.6844	31.0527	8.08232	8.31889	Trans
17265186	Rnasek	ribonuclease, RNase K	52898	Chr11	-	70.2382	70.2398	UNC28362275	Chr17	75.699	75.4075	77.5846	7.7343	8.60565	Trans
17265268	Cxcl16	chemokine (C-X-C motif) ligand 16	66102	Chr11	-	70.4541	70.4598	UNC19899616	Chr11	72.2649	69.8561	72.4255	7.63916	14.5661	Cis
17265285	Chrne	cholinergic receptor, nicotinic, epsilon polypeptide	11448	Chr11	-	70.6149	70.6192	UNC19092125	Chr11	11.8598	11.5854	72.9778	7.65997	7.81404	Trans
17265526	Nlrp1c-ps	NLR family, pyrin domain containing 1C, pseudogene	627984	Chr11	-	71.2425	71.2799	UNC19932686	Chr11	75.927	70.6464	76.3016	7.65889	11.2974	Trans
17265748	Aspa	aspartoacylase	11484	Chr11	-	73.3054	73.3246	UNC19904811	Chr11	72.995	72.4442	78.9637	8.01852	9.16017	Cis
17265825	Rap1gap2	RAP1 GTPase activating protein 2	380711	Chr11	-	74.3834	74.59	UNC29371090	Chr18	59.6667	58.1673	60.3623	7.87049	8.45084	Trans
17265896	Srr	serine racemase	27364	Chr11	-	74.9069	74.9259	UNC19921245	Chr11	74.7469	74.7469	76.5805	8.07926	11.0347	Cis
17265976	Serpinf2	serine (or cysteine) peptidase inhibitor, clade F, member 2	18816	Chr11	-	75.4321	75.4395	UNC19929899	Chr11	75.6959	75.3374	76.5805	8.00688	12.359	Cis
17266038	Rflnb	refilin B	76566	Chr11	-	76.0194	76.0277	UNC19925918	Chr11	75.3033	74.7469	81.6313	7.76381	9.66616	Cis
17266079	Glod4	glyoxalase domain containing 4	67201	Chr11	-	76.221	76.2437	JAX00315246	Chr11	72.9945	71.8469	76.4217	7.84581	11.0605	Trans
17266157	Cpd	carboxypeptidase D	12874	Chr11	-	76.7803	76.8468	UNC19949895	Chr11	77.4551	69.8561	77.4551	7.84468	9.39448	Cis
17266223	Ankrd13b	ankyrin repeat domain 13b	268445	Chr11	-	77.4711	77.4895	UNC19949895	Chr11	77.4551	76.8823	78.0229	7.59808	14.0381	Cis
17266372	Snord42b	small nucleolar RNA, C/D box 42B	100529077	Chr11	-	78.1831	78.1831	UNC11837436	Chr6	110.233	107.48	113.935	9.15461	9.80276	Trans
17266732	Asic2	acid-sensing (proton-gated) ion channel 2	11418	Chr11	-	80.8807	81.9684	JAX00316215	Chr11	80.6176	79.9909	83.8618	7.86203	10.0663	Cis
17266978	Dusp14	dual specificity phosphatase 14	56405	Chr11	-	84.0481	84.0693	JAX00030071	Chr11	88.0446	84.7324	88.7739	7.74075	9.06587	Trans
17267011	Gm11437	predicted gene 11437	628813	Chr11	-	84.1485	84.1675	JAX00127940	Chr5	24.2137	23.1668	24.3204	7.74465	8.55122	Trans
17267039	Lhx1	LIM homeobox protein 1	16869	Chr11	-	84.5181	84.5253	UNC130178222	Chr13	100.096	97.9016	100.492	8.14835	10.5695	Trans
17267066	Dhrs11	dehydrogenase/reductase (SDR family) member 11	192970	Chr11	-	84.8208	84.829	UNC20053912	Chr11	86.4581	86.0258	88.2181	7.80299	8.02191	Cis
17267471	Ppm1e	protein phosphatase 1E (PP2C domain containing)	320472	Chr11	-	87.2295	87.3589	UNC070499108	Chr7	50.0644	49.9092	50.3199	7.54033	7.73863	Trans
17267504	Lpo	lactoperoxidase	76113	Chr11	-	87.8065	87.8282	UNC20057205	Chr11	86.8063	86.2984	89.2097	9.01424	9.61847	Cis
17267617	Gm15698	transcription elongation factor B (SIII), polypeptide 2 pseudogene	217066	Chr11	-	88.9649	88.9668	UNC20086239	Chr11	89.1572	87.6852	89.2732	7.68071	8.15549	Cis
17267685	Pctp	phosphatidylcholine transfer protein	18559	Chr11	-	89.9827	90.0029	UNC20098727	Chr11	90.0154	89.7415	90.0335	7.92282	9.48255	Cis
17267716	Stxbp4	syntaxin binding protein 4	20913	Chr11	-	90.4781	90.6381	UNC20113809	Chr11	90.9189	90.7013	91.7098	8.29347	11.137	Cis
17267804	Nme1	NME/NM23 nucleoside diphosphate kinase 1	18102	Chr11	-	93.9577	93.9684	UNC20161823	Chr11	93.8944	93.6749	93.8944	7.86357	24.0033	Cis
17267970	Mycbpap	MYCBP associated protein	104601	Chr11	-	94.5014	94.5216	UNC22443346	Chr13	38.1065	33.5284	40.4915	7.76829	7.89151	Trans
17267970	Mycbpap	MYCBP associated protein	104601	Chr11	-	94.5014	94.5216	UNC20173504	Chr11	94.8911	90.2186	95.7685	7.76829	8.30136	Cis
17267996	Rsad1	radical S-adenosyl methionine domain containing 1	237926	Chr11	-	94.5399	94.5493	UNC20162579	Chr11	93.9654	93.6749	94.7937	7.6894	8.36499	Cis
17268010	Acsf2	acyl-CoA synthetase family member 2	264895	Chr11	-	94.5571	94.6018	JAX00318696	Chr11	94.1935	93.5105	94.7937	7.7734	8.42798	Cis
17268061	Gm11541	predicted gene 11541	432589	Chr11	-	94.6947	94.7045	UNC20178517	Chr11	95.2909	94.7937	96.212	8.19341	25.5167	Cis
17268120	Pdk2	pyruvate dehydrogenase kinase, isoenzyme 2	18604	Chr11	-	95.0265	95.0414	UNC26522211	Chr16	26.737	25.8768	27.4919	7.86352	8.25928	Trans
17268404	Pnpo	pyridoxine 5'-phosphate oxidase	103711	Chr11	-	96.9386	96.944	UNC20198437	Chr11	96.8631	96.6458	97.2703	9.02508	15.1463	Cis
17268627	1700001P01Rik	RIKEN cDNA 1700001P01 gene	72215	Chr11	-	97.7715	97.7759	UNC110389132	Chr11	97.9293	97.389	98.4944	7.71244	12.3572	Cis
17268810	Mien1	migration and invasion enhancer 1	103742	Chr11	-	98.4377	98.439	UNC20224441	Chr11	99.1167	97.4915	99.196	8.14531	12.0639	Cis
17268898	Gm12359	predicted gene 12359	100037262	Chr11	-	98.7977	98.8099	UNC20220320	Chr11	98.7135	98.551	98.9564	7.7789	11.7316	Cis
17269064	Krt10	keratin 10	16661	Chr11	-	99.3854	99.3894	UNC20236706	Chr11	99.9701	96.3151	99.9805	7.65462	9.62538	Cis
17269096	Krt23	keratin 23	94179	Chr11	-	99.4781	99.4931	UNC20226012	Chr11	99.244	96.9726	100.019	7.70198	10.1618	Cis
17269301	Krt31	keratin 31	16660	Chr11	-	100.047	100.051	UNC26091944	Chr15	90.7257	90.2386	90.9208	8.04382	8.09058	Trans
17269368	Krt19	keratin 19	16669	Chr11	-	100.141	100.149	UNC20238867	Chr11	100.117	97.027	101.626	7.78026	8.07197	Cis
17269695	Stat5b	signal transducer and activator of transcription 5B	20851	Chr11	-	100.783	100.823	UNC8208264	Chr4	129.373	128.931	129.803	7.87574	8.06825	Trans
17269717	Stat3	signal transducer and activator of transcription 3	20848	Chr11	-	100.886	100.94	JAX00104869	Chr3	18.3794	16.8923	18.5296	9.03702	9.05942	Trans
17269758	Psmc3ip	proteasome (prosome, macropain) 26S subunit, ATPase 3, interacting protein	19183	Chr11	-	101.092	101.095	JAX00320036	Chr11	100.797	100.601	101.068	7.73218	27.0233	Cis
17269974	Meox1	mesenchyme homeobox 1	17285	Chr11	-	101.878	101.894	JAX00320036	Chr11	100.797	100.191	102.698	7.70222	10.7996	Cis
17269985	Dusp3	dual specificity phosphatase 3 (vaccinia virus phosphatase VH1-related)	72349	Chr11	-	101.973	101.987	UNC20263444	Chr11	102.022	101.945	103.697	7.56686	18.7158	Cis
17270053	Pyy	peptide YY	217212	Chr11	-	102.107	102.108	UNC070685929	Chr7	115.037	114.698	115.494	7.91293	8.1591	Trans
17270060	Gm11586	predicted gene 11586	105243487	Chr11	-	102.146	102.146	UNC203703	Chr1	18.3313	16.4683	19.838	7.7957	8.62392	Trans
17270388	C1ql1	complement component 1, q subcomponent-like 1	23829	Chr11	-	102.939	102.946	UNC20271946	Chr11	102.801	102.801	103.577	8.12173	9.58895	Cis
17270446	Spata32	spermatogenesis associated 32	328019	Chr11	-	103.208	103.211	UNC7282580	Chr4	54.8753	54.7748	55.6376	8.03617	8.36074	Trans
17270481	Arhgap27	Rho GTPase activating protein 27	544817	Chr11	-	103.332	103.364	UNC20285866	Chr11	103.879	102.835	104.547	7.76832	8.24201	Cis
17270682	1700052K11Rik	RIKEN cDNA 1700052K11 gene	73431	Chr11	-	105.179	105.181	UNC20336327	Chr11	107.934	104.958	109.376	7.67276	11.1267	Trans
17270783	Ftsj3	FtsJ RNA methyltransferase homolog 3 (E. coli)	56095	Chr11	-	106.249	106.256	UNC20310115	Chr11	105.807	105.578	106.57	9.93563	16.6589	Cis
17270937	Pecam1	platelet/endothelial cell adhesion molecule 1	18613	Chr11	-	106.654	106.75	UNC12176731	Chr6	136.666	135.954	142.539	8.59389	9.49524	Trans
17271118	Pitpnc1	phosphatidylinositol transfer protein, cytoplasmic 1	71795	Chr11	-	107.21	107.47	UNC20285866	Chr11	103.879	103.031	107.935	7.63682	8.06243	Trans
17271168	Prkca	protein kinase C, alpha	18750	Chr11	-	107.934	108.344	UNC20352292	Chr11	109.094	106.756	109.376	7.69411	19.4245	Cis
17271307	Abca8b	ATP-binding cassette, sub-family A (ABC1), member 8b	27404	Chr11	-	109.934	109.996	UNC20371249	Chr11	110.195	109.839	110.554	7.7869	20.1733	Cis
17271350	Abca8a	ATP-binding cassette, sub-family A (ABC1), member 8a	217258	Chr11	-	110.026	110.096	JAX00321533	Chr11	109.756	106.413	112.022	7.60486	7.75156	Cis
17271399	Abca9	ATP-binding cassette, sub-family A (ABC1), member 9	217262	Chr11	-	110.101	110.168	backupUNC090353537	Chr9	92.317	86.749	94.9078	7.79033	8.04237	Trans
17271399	Abca9	ATP-binding cassette, sub-family A (ABC1), member 9	217262	Chr11	-	110.101	110.168	UNC20367657	Chr11	110.02	109.756	110.114	7.79033	16.3713	Cis
17271486	Abca5	ATP-binding cassette, sub-family A (ABC1), member 5	217265	Chr11	-	110.271	110.338	JAX00321533	Chr11	109.756	108.778	110.554	7.82796	10.227	Cis
17271776	Cd300lf	CD300 molecule like family member F	246746	Chr11	-	115.116	115.134	UNC170015684	Chr17	9.68751	8.94728	14.939	7.80068	8.17882	Trans
17271907	Gm11695	predicted gene 11695	102634708	Chr11	-	115.462	115.463	UNC20460357	Chr11	115.351	115.248	116.327	7.99547	8.69614	Cis
17272262	Evpl	envoplakin	14027	Chr11	-	116.221	116.238	UNC20462629	Chr11	115.568	115.384	116.307	7.88679	20.5552	Cis
17272468	St6galnac2	ST6 (alpha-N-acetyl-neuraminyl-2,3-beta-galactosyl-1,3)-N-acetylgalactosaminide alpha-2,6-sialyltransferase 2	20446	Chr11	-	116.676	116.695	JAX00322928	Chr11	116.686	116.669	116.738	7.68923	18.0949	Cis
17272594	Tk1	thymidine kinase 1	21877	Chr11	-	117.816	117.826	UNC20492040	Chr11	117.682	117.651	118.277	7.61681	22.0007	Cis
17272785	Lgals3bp	lectin, galactoside-binding, soluble, 3 binding protein	19039	Chr11	-	118.393	118.402	UNC20501670	Chr11	118.484	118.046	118.543	7.88798	13.4336	Cis
17272870	Gm11755	predicted gene 11755	105243637	Chr11	-	119.123	119.138	UNC11460071	Chr6	80.4393	77.9635	84.5294	7.59641	8.08817	Trans
17273280	Cenpx	centromere protein X	20892	Chr11	-	120.711	120.714	UNC20528643	Chr11	120.811	120.626	121.213	7.86007	9.57489	Cis
17273292	Dcxr	dicarbonyl L-xylulose reductase	67880	Chr11	-	120.725	120.727	JAX00032537	Chr11	121.01	120.626	121.797	7.87443	9.30256	Cis
17273304	Cbr2	carbonyl reductase 2	12409	Chr11	-	120.73	120.732	UNC20533119	Chr11	121.208	120.626	121.62	7.59703	12.6386	Cis
17273316	Rfng	RFNG O-fucosylpeptide 3-beta-N-acetylglucosaminyltransferase	19719	Chr11	-	120.781	120.784	UNC26574475	Chr16	30.1561	29.508	31.5277	7.86925	8.02248	Trans
17273316	Rfng	RFNG O-fucosylpeptide 3-beta-N-acetylglucosaminyltransferase	19719	Chr11	-	120.781	120.784	UNC20529978	Chr11	120.989	120.626	121.156	7.86925	9.08649	Cis
17273328	Dus1l	dihydrouridine synthase 1-like (S. cerevisiae)	68730	Chr11	-	120.789	120.796	UNC26565655	Chr16	29.508	23.7615	30.2986	8.43857	9.87183	Trans
17273447	Sectm1b	secreted and transmembrane 1B	58210	Chr11	-	121.054	121.063	JAX00032544	Chr11	121.075	120.884	121.456	7.73856	15.6974	Cis
17273460	Sectm1a	secreted and transmembrane 1A	209588	Chr11	-	121.068	121.081	JAX00199629	Chr11	121.213	121.075	121.799	7.6523	10.9255	Cis
17273536	Zfp750	zinc finger protein 750	319530	Chr11	-	121.512	121.519	UNC23381781	Chr13	111.841	111.383	111.964	7.83977	8.96064	Trans
17273536	Zfp750	zinc finger protein 750	319530	Chr11	-	121.512	121.519	UNC20533811	Chr11	121.262	121.262	121.896	7.83977	8.03201	Cis
17273798	Pfn4	profilin family, member 4	382562	Chr12	+	4.76939	4.77825	UNC20560330	Chr12	5.18091	3.38218	5.25391	7.61049	19.147	Cis
17273806	Sf3b6	splicing factor 3B, subunit 6	66055	Chr12	+	4.81763	4.82756	UNC20547890	Chr12	3.9307	3.8874	5.18091	7.52594	35.2613	Cis
17273864	Apob	apolipoprotein B	238055	Chr12	+	7.9777	8.01669	UNC20576165	Chr12	6.88115	6.83367	7.76474	7.40711	19.9162	Cis
17273864	Apob	apolipoprotein B	238055	Chr12	+	7.9777	8.01669	JAX00294223	Chr10	84.162	82.9942	84.7412	7.40711	7.84891	Trans
17273864	Apob	apolipoprotein B	238055	Chr12	+	7.9777	8.01669	UNC13755337	Chr7	122.254	115.084	122.832	7.40711	8.00982	Trans
17273910	Hs1bp3	HCLS1 binding protein 3	58240	Chr12	+	8.31782	8.34351	UNC20586263	Chr12	7.76474	5.73166	8.7615	7.87327	10.8103	Cis
17274015	Ttc32	tetratricopeptide repeat domain 32	75516	Chr12	+	9.03	9.03637	UNC20606837	Chr12	9.6887	7.97049	9.86654	7.78307	18.1435	Cis
17274021	Osr1	odd-skipped related transcription factor 1	23967	Chr12	+	9.57446	9.58145	UNC20614630	Chr12	10.3573	9.92363	10.3573	7.82102	11.9945	Cis
17274415	Asap2	ArfGAP with SH3 domain, ankyrin repeat and PH domain 2	211914	Chr12	+	21.1852	21.2686	UNC20723054	Chr12	21.1217	21.1217	21.2203	7.72488	22.5667	Cis
17274471	Iah1	isoamyl acetate-hydrolyzing esterase 1 homolog	67732	Chr12	+	21.3164	21.3236	UNC20730340	Chr12	21.5993	21.1217	24.5909	7.63129	24.1084	Cis
17274484	Gm4419	predicted gene 4419	100043407	Chr12	+	21.4179	21.4198	JAX00033918	Chr12	21.3808	17.6337	25.2123	7.67343	8.1238	Cis
17274574	Kidins220	kinase D-interacting substrate 220	77480	Chr12	+	24.975	25.0613	UNC_rs29214434	Chr12	25.1427	16.7173	25.6652	7.90387	19.4504	Cis
17274649	Adi1	acireductone dioxygenase 1	104923	Chr12	+	28.6752	28.6819	JAX00328826	Chr12	28.7246	28.6486	29.2941	8.70317	23.5271	Cis
17274751	Sh3yl1	Sh3 domain YSC-like 1	24057	Chr12	+	30.9117	30.9601	UNC20791781	Chr12	28.5706	28.415	34.0465	8.04262	9.9106	Trans
17275003	Agr3	anterior gradient 3	403205	Chr12	+	35.9257	35.9496	UNC25620567	Chr15	54.4828	54.3876	54.965	7.7669	8.22723	Trans
17275029	Ankmy2	ankyrin repeat and MYND domain containing 2	217473	Chr12	+	36.1572	36.197	UNC20875955	Chr12	34.6854	33.0864	40.7491	7.83334	9.60828	Cis
17275042	Sostdc1	sclerostin domain containing 1	66042	Chr12	+	36.3142	36.3184	UNC20902928	Chr12	36.5348	36.2508	36.8215	7.66635	21.807	Cis
17275069	Agmo	alkylglycerol monooxygenase	319660	Chr12	+	37.2418	37.582	UNC20917226	Chr12	37.5081	37.3149	40.1544	7.7106	15.8668	Cis
17275378	Coch	cochlin	12810	Chr12	+	51.5933	51.6056	UNC120134157	Chr12	51.278	50.2525	53.1081	7.57645	26.012	Cis
17275392	Ap4s1	adaptor-related protein complex AP-4, sigma 1	11782	Chr12	+	51.691	51.7389	UNC21107899	Chr12	51.9916	50.2525	53.3256	7.72545	9.59335	Cis
17275408	Nubpl	nucleotide binding protein-like	76826	Chr12	+	52.0978	52.312	UNC26483762	Chr16	23.9249	22.8578	24.353	8.25922	8.56614	Trans
17275408	Nubpl	nucleotide binding protein-like	76826	Chr12	+	52.0978	52.312	UNC120134157	Chr12	51.278	50.084	53.0289	8.25922	10.1078	Cis
17275472	Srp54a	signal recognition particle 54A	24067	Chr12	+	55.1143	55.1144	UNC21122307	Chr12	53.1081	53.0741	56.0302	7.50685	17.4833	Trans
17275890	Klhdc1	kelch domain containing 1	271005	Chr12	+	69.2412	69.2844	UNC19707241	Chr11	57.9303	56.2132	59.2373	7.98467	8.20465	Trans
17276098	Tomm20l	translocase of outer mitochondrial membrane 20 homolog (yeast)-like	75266	Chr12	+	71.1115	71.1232	UNC21375644	Chr12	71.8615	70.9167	72.1012	7.67817	12.9777	Cis
17276147	4930404H11Rik	RIKEN cDNA 4930404H11 gene	73815	Chr12	+	71.5406	71.5561	UNC21352850	Chr12	70.4069	70.2417	71.1655	7.73391	25.2021	Cis
17276192	Lrrc9	leucine rich repeat containing 9	78257	Chr12	+	72.442	72.5125	JAX00337559	Chr12	71.9734	64.8567	72.9563	7.87667	8.96792	Cis
17276273	Slc38a6	solute carrier family 38, member 6	625098	Chr12	+	73.2868	73.3537	UNC21398493	Chr12	73.6129	59.1376	74.9775	7.68813	10.0302	Cis
17276328	Hif1a	hypoxia inducible factor 1, alpha subunit	15251	Chr12	+	73.9014	73.9474	UNC21411635	Chr12	74.7705	73.9838	75.0084	7.6287	11.4015	Cis
17276352	Snapc1	small nuclear RNA activating complex, polypeptide 1	75627	Chr12	+	73.9646	73.9846	UNC21399119	Chr12	73.6524	71.8018	75.7505	7.88254	8.20123	Cis
17276583	Gm10451	predicted gene 10451	100041694	Chr12	+	76.4445	76.4513	UNC21430862	Chr12	76.483	76.0792	76.5055	7.72256	23.887	Cis
17276614	Churc1	churchill domain containing 1	211151	Chr12	+	76.7655	76.7832	UNC21437982	Chr12	77.0238	76.5424	77.9919	7.33317	14.9353	Cis
17276674	Gphn	gephyrin	268566	Chr12	+	78.2267	78.684	UNC21457973	Chr12	78.948	78.1576	79.7159	7.50582	12.2274	Cis
17277017	Rgs6	regulator of G-protein signaling 6	50779	Chr12	+	82.6169	83.1586	UNC21502522	Chr12	82.6203	81.779	83.1273	7.7068	14.162	Cis
17277063	Rbm25	RNA binding motif protein 25	67039	Chr12	+	83.6323	83.682	UNC26573318	Chr16	30.0767	29.7224	30.3866	7.60938	7.94334	Trans
17277146	Acot4	acyl-CoA thioesterase 4	171282	Chr12	+	84.0384	84.0443	JAX00340118	Chr12	84.1181	83.4771	84.4679	7.63755	14.5277	Cis
17277161	Acot5	acyl-CoA thioesterase 5	217698	Chr12	+	84.0693	84.076	backupUNC121057817	Chr12	83.343	83.1273	84.4679	7.62848	18.3601	Cis
17277294	Isca2	iron-sulfur cluster assembly 2	74316	Chr12	+	84.7733	84.775	UNC21529271	Chr12	84.8539	84.6395	84.8539	7.97639	15.1913	Cis
17277396	Jdp2	Jun dimerization protein 2	81703	Chr12	+	85.5996	85.6398	UNC832262	Chr1	66.25	64.7006	73.4156	7.77151	8.02937	Trans
17277490	Gpatch2l	G patch domain containing 2 like	70373	Chr12	+	86.2441	86.2914	UNC21558579	Chr12	87.0492	84.69	90.0744	7.61782	11.0697	Cis
17277521	Vash1	vasohibin 1	238328	Chr12	+	86.6789	86.6952	UNC2622000	Chr2	14.8639	13.8368	15.0967	7.7961	8.05569	Trans
17277659	BB287469	expressed sequence BB287469	544881	Chr12	+	87.8166	87.8204	UNC30748057	ChrX	37.0308	36.5633	37.0308	9.06169	9.55047	Trans
17277712	Nrxn3	neurexin III	18191	Chr12	+	88.725	90.3346	JAX00340618	Chr12	87.1729	87.1315	88.6803	7.6841	10.181	Cis
17277837	Ttc8	tetratricopeptide repeat domain 8	76260	Chr12	+	98.9207	98.9829	JAX00342932	Chr12	98.9609	98.8682	98.977	7.95168	12.0282	Cis
17278124	Cox8c	cytochrome c oxidase subunit VIIIc	75483	Chr12	+	102.899	102.901	UNC12209527	Chr6	138.67	134.342	142.539	7.82251	7.92711	Trans
17278200	Ifi27	interferon, alpha-inducible protein 27	52668	Chr12	+	103.434	103.44	UNC21786756	Chr12	104.014	102.685	104.175	7.73478	10.1966	Cis
17278290	Serpina3h	serine (or cysteine) peptidase inhibitor, clade A, member 3H	546546	Chr12	+	104.25	104.254	UNC21789607	Chr12	104.159	104.004	104.281	7.77059	10.1868	Cis
17278415	Ak7	adenylate kinase 7	78801	Chr12	+	105.706	105.782	JAX00344448	Chr12	105.217	104.008	108.585	7.64841	7.73851	Cis
17278467	Gm19554	predicted gene, 19554	100503099	Chr12	+	105.9	105.902	JAX00164557	Chr8	88.6535	87.8955	89.3445	7.73669	8.17657	Trans
17278467	Gm19554	predicted gene, 19554	100503099	Chr12	+	105.9	105.902	UNC21812914	Chr12	105.637	105.637	106.959	7.73669	17.6549	Cis
17278543	Cyp46a1	cytochrome P450, family 46, subfamily a, polypeptide 1	13116	Chr12	+	108.334	108.362	UNC21858339	Chr12	108.585	108.316	108.658	7.74016	10.9239	Cis
17278787	AF357341	snoRNA AF357341	493920	Chr12	+	109.682	109.682	UNC6777361	Chr4	14.6972	14.2978	14.8559	7.96122	10.2679	Trans
17279088	Amn	amnionless	93835	Chr12	+	111.272	111.276	UNC21893289	Chr12	111.334	110.165	112.012	8.05636	17.0097	Cis
17279113	Exoc3l4	exocyst complex component 3-like 4	74190	Chr12	+	111.417	111.431	UNC21886127	Chr12	110.737	110.176	111.334	8.19463	9.94814	Cis
17279169	Mark3	MAP/microtubule affinity regulating kinase 3	17169	Chr12	+	111.575	111.656	UNC21885052	Chr12	110.664	110.176	111.817	7.65379	9.22862	Cis
17279230	Zfyve21	zinc finger, FYVE domain containing 21	68520	Chr12	+	111.814	111.828	UNC26307957	Chr16	8.83917	8.70782	9.6506	7.54073	7.63322	Trans
17279324	Inf2	inverted formin, FH2 and WH2 domain containing	70435	Chr12	+	112.589	112.616	JAX00346766	Chr12	112.951	112.547	113.15	7.66702	12.4352	Cis
17279381	Cep170b	centrosomal protein 170B	217882	Chr12	+	112.725	112.746	UNC21480326	Chr12	80.6495	80.5997	81.609	7.75496	8.35768	Trans
17279417	BC022687	cDNA sequence BC022687	217887	Chr12	+	112.809	112.816	UNC21913689	Chr12	112.693	112.606	112.968	7.68405	12.5564	Cis
17279737	Rab10	RAB10, member RAS oncogene family	19325	Chr12	-	3.24833	3.3097	UNC20547890	Chr12	3.9307	3.38218	7.88	7.82006	13.8164	Cis
17279749	1110002L01Rik	RIKEN cDNA 1110002L01 gene	100043040	Chr12	-	3.40511	3.42675	UNC20549832	Chr12	4.13005	3.38218	5.18091	7.68124	12.3637	Cis
17279849	Fam228b	family with sequence similarity 228, member B	207921	Chr12	-	4.74733	4.76926	UNC20547528	Chr12	3.8874	3.38218	5.18091	7.5209	22.2837	Cis
17279858	Fkbp1b	FK506 binding protein 1b	14226	Chr12	-	4.83318	4.84158	JAX00323996	Chr12	3.79834	3.38218	4.88812	7.62493	14.2167	Cis
17280086	Greb1	gene regulated by estrogen in breast cancer protein	268527	Chr12	-	16.6711	16.8009	UNC20706849	Chr12	17.057	16.1873	17.6337	8.01243	17.0039	Cis
17280086	Greb1	gene regulated by estrogen in breast cancer protein	268527	Chr12	-	16.6711	16.8009	UNC5104141	Chr3	40.3262	38.4704	47.6688	8.01243	8.09775	Trans
17280125	Pqlc3	PQ loop repeat containing	217430	Chr12	-	16.989	17.0003	UNC4793161	Chr3	18.0116	16.8923	19.1609	7.80205	8.17719	Trans
17280184	Zfp125	zinc finger protein 125	22651	Chr12	-	20.8999	20.9007	UNC20723054	Chr12	21.1217	17.6337	21.5993	7.67779	27.4598	Cis
17280184	Zfp125	zinc finger protein 125	22651	Chr12	-	20.8999	20.9007	JAX00674992	Chr8	87.2689	85.8329	88.0791	7.67779	8.15907	Trans
17280235	Ywhaq	tyrosine 3-monooxygenase/tryptophan 5-monooxygenase activation protein theta	22630	Chr12	-	21.3901	21.4176	UNC11598081	Chr6	92.7112	90.8776	95.5829	7.93014	9.51221	Trans
17280452	Sntg2	syntrophin, gamma 2	268534	Chr12	-	30.1745	30.3733	UNC20825770	Chr12	30.6623	28.4389	33.3801	7.64532	7.81421	Cis
17280515	Cbll1	Casitas B-lineage lymphoma-like 1	104836	Chr12	-	31.4863	31.4996	JAX00322535	Chr11	114.701	114.417	115.248	7.76885	8.50693	Trans
17280609	Pik3cg	phosphatidylinositol-4,5-bisphosphate 3-kinase catalytic subunit gamma	30955	Chr12	-	32.1736	32.2086	UNC26475659	Chr16	23.3138	22.8196	23.8433	8.64948	8.83721	Trans
17280790	Ispd	isoprenoid synthase domain containing	75847	Chr12	-	36.3812	36.382	UNC20901600	Chr12	36.4338	34.667	36.8984	7.53294	14.0752	Cis
17280806	Arl4a	ADP-ribosylation factor-like 4A	11861	Chr12	-	40.0096	40.0145	UNC120117169	Chr12	39.6943	37.3149	41.6116	7.65151	12.1064	Cis
17280842	Ifrd1	interferon-related developmental regulator 1	15982	Chr12	-	40.2017	40.2484	JAX00506161	Chr2	145.105	144.832	145.115	9.61017	9.65732	Trans
17281063	Dtd2	D-tyrosyl-tRNA deacylase 2	328092	Chr12	-	51.9886	52.0065	UNC120399677	Chr12	49.7995	48.2937	53.7879	8.02867	11.4485	Trans
17281108	Eapp	E2F-associated phosphoprotein	66266	Chr12	-	54.6704	54.6959	UNC21136979	Chr12	54.1744	48.7827	56.7993	7.71949	9.52551	Cis
17281126	Snx6	sorting nexin 6	72183	Chr12	-	54.7469	54.7957	UNC21139604	Chr12	54.3582	53.877	54.862	7.61933	19.976	Cis
17281126	Snx6	sorting nexin 6	72183	Chr12	-	54.7469	54.7957	UNC17171938	Chr9	114.474	113.401	114.746	7.61933	7.74672	Trans
17281337	Foxa1	forkhead box A1	15375	Chr12	-	57.5412	57.5461	UNC25624794	Chr15	54.781	54.781	55.917	8.41575	9.84737	Trans
17281350	Clec14a	C-type lectin domain family 14, member a	66864	Chr12	-	58.2651	58.2692	UNC21187058	Chr12	58.2882	54.5784	59.0342	7.76834	13.9419	Cis
17281419	Fkbp3	FK506 binding protein 3	30795	Chr12	-	65.0625	65.0739	JAX00335937	Chr12	65.0081	62.6321	67.5079	7.77446	15.7542	Cis
17281529	Nemf	nuclear export mediator factor	66244	Chr12	-	69.3117	69.3571	UNC21343803	Chr12	69.7887	67.0337	70.1202	8.79233	9.32103	Cis
17281609	L2hgdh	L-2-hydroxyglutarate dehydrogenase	217666	Chr12	-	69.6915	69.7249	backupUNC030014678	Chr3	16.7528	14.0699	16.8029	8.52246	9.26325	Trans
17281609	L2hgdh	L-2-hydroxyglutarate dehydrogenase	217666	Chr12	-	69.6915	69.7249	UNC21341292	Chr12	69.5421	68.3727	69.6149	8.52246	16.702	Cis
17281635	Mir681	microRNA 681	751538	Chr12	-	69.7638	69.7639	JAX00336932	Chr12	69.7045	68.3903	69.7887	7.71299	17.2107	Cis
17281789	Gpr135	G protein-coupled receptor 135	238252	Chr12	-	72.0696	72.071	UNC21378813	Chr12	72.0567	71.5351	72.1438	7.50783	15.924	Cis
17281789	Gpr135	G protein-coupled receptor 135	238252	Chr12	-	72.0696	72.071	UNC31313525	ChrX	129.789	114.821	131.789	7.50783	9.03709	Trans
17281791	L3hypdh	L-3-hydroxyproline dehydratase (trans-)	67217	Chr12	-	72.0735	72.0854	UNC21378813	Chr12	72.0567	71.5351	72.1438	7.97381	10.1717	Cis
17281843	Dhrs7	dehydrogenase/reductase (SDR family) member 7	66375	Chr12	-	72.6504	72.6648	backupJAX00037596	Chr12	72.1438	71.6772	73.5996	7.70363	10.3518	Cis
17281979	Esr2	estrogen receptor 2 (beta)	13983	Chr12	-	76.1212	76.1772	UNC21425563	Chr12	76.0658	75.9956	76.3195	7.87549	12.5611	Cis
17282090	Max	Max protein	17187	Chr12	-	76.9374	76.9622	UNC9710582	Chr5	93.6949	92.8638	96.2358	7.95769	8.25658	Trans
17282117	Plek2	pleckstrin 2	27260	Chr12	-	78.8889	78.9069	UNC21457973	Chr12	78.948	78.0998	79.8945	7.76301	8.37374	Cis
17282148	Vti1b	vesicle transport through interaction with t-SNAREs 1B	53612	Chr12	-	79.156	79.1726	JAX00038127	Chr12	79.2208	78.1394	80.1741	7.77084	14.9064	Cis
17282226	Actn1	actinin, alpha 1	109711	Chr12	-	80.1677	80.2603	JAX00339433	Chr12	80.2373	79.6974	81.6495	8.44352	8.79588	Cis
17282300	Slc10a1	solute carrier family 10 (sodium/bile acid cotransporter family), member 1	20493	Chr12	-	80.9534	80.9681	UNC21487798	Chr12	81.2989	80.6704	81.513	7.91552	18.9673	Cis
17282320	Cox16	cytochrome c oxidase assembly protein 16	66272	Chr12	-	81.3591	81.485	UNC120195454	Chr12	81.1114	80.6495	81.9959	7.68751	11.29	Cis
17282420	Zfyve1	zinc finger, FYVE domain containing 1	217695	Chr12	-	83.5472	83.5971	UNC21519441	Chr12	84.1055	82.8274	84.5536	7.6088	8.16547	Cis
17282465	Elmsan1	ELM2 and Myb/SANT-like domain containing 1	238317	Chr12	-	84.1502	84.2189	UNC8249751	Chr4	132.916	132.897	135.04	7.74833	7.98422	Trans
17282641	Prox2	prospero homeobox 2	73422	Chr12	-	85.0871	85.1064	UNC17094368	Chr9	108.366	108.322	108.974	7.7086	9.69598	Trans
17282760	Angel1	angel homolog 1	68737	Chr12	-	86.701	86.7264	UNC21531637	Chr12	85.0805	80.6495	86.7257	7.43313	8.06911	Cis
17282980	Cep128	centrosomal protein 128	75216	Chr12	-	90.999	91.3844	backupUNC180157522	Chr18	70.4713	70.1386	70.691	7.7601	8.3005	Trans
17283056	Sel1l	sel-1 suppressor of lin-12-like (C. elegans)	20338	Chr12	-	91.8061	91.8491	UNC21604038	Chr12	91.3931	90.026	95.0901	7.90725	11.1699	Cis
17283364	Tc2n	tandem C2 domains, nuclear	74413	Chr12	-	101.646	101.711	UNC21752849	Chr12	100.937	100.937	102.244	7.82046	26.624	Cis
17283435	LOC102631912	uncharacterized LOC102631912	102631912	Chr12	-	101.968	101.977	UNC21762112	Chr12	101.994	100.032	102.282	7.70441	9.43427	Cis
17283463	Itpk1	inositol 1,3,4-triphosphate 5/6 kinase	217837	Chr12	-	102.569	102.705	UNC21771730	Chr12	102.649	100.998	102.853	7.73289	12.6374	Cis
17283502	Prima1	proline rich membrane anchor 1	170952	Chr12	-	103.197	103.242	JAX00343975	Chr12	103.224	102.719	103.728	7.72395	11.9504	Cis
17283725	Clmn	calmin	94040	Chr12	-	104.768	104.865	UNC8771158	Chr5	21.5983	21.5983	21.5983	10.3526	10.5441	Trans
17284020	Mok	MOK protein kinase	26448	Chr12	-	110.808	110.841	JAX00346227	Chr12	111.316	110.737	111.371	7.76293	12.2516	Cis
17284108	Gm266	predicted gene 266	212539	Chr12	-	111.485	111.486	UNC30159017	Chr19	28.6377	28.4272	29.8771	7.7705	7.88869	Trans
17284354	Ighm	immunoglobulin heavy constant mu	16019	Chr12	-	113.429	113.429	JAX00628750	Chr6	140.504	140.093	141.531	7.74512	8.45623	Trans
17284356	Ighm	immunoglobulin heavy constant mu	16019	Chr12	-	113.429	113.429	UNC24865951	Chr14	118.598	116.297	119.38	7.89135	8.04365	Trans
17547694	2900097C17Rik	RIKEN cDNA 2900097C17 gene	347740	Chr12	-	36.3761	36.3769	UNC15153385	Chr8	85.6478	81.9809	87.2361	7.57384	8.80588	Trans
17284936	Akr1c13	aldo-keto reductase family 1, member C13	27384	Chr13	+	4.19472	4.20554	UNC3707607	Chr2	106.753	104.561	107.243	7.69168	8.14338	Trans
17284948	Akr1c19	aldo-keto reductase family 1, member C19	432720	Chr13	+	4.22875	4.24843	UNC22038441	Chr13	4.75253	3.1877	8.38721	7.74152	8.79939	Cis
17284981	Akr1c21	aldo-keto reductase family 1, member C21	77337	Chr13	+	4.57408	4.58648	UNC130005651	Chr13	5.39578	3.1877	10.712	8.21252	10.3837	Cis
17285244	Nid1	nidogen 1	18073	Chr13	+	13.4376	13.5102	UNC2608539	Chr2	13.8368	13.7953	14.4819	7.66521	7.82745	Trans
17285386	Psma2	proteasome (prosome, macropain) subunit, alpha type 2	19166	Chr13	+	14.6132	14.6267	UNC22156119	Chr13	14.6611	12.1448	32.5332	7.73678	7.75938	Cis
17285456	Vps41	VPS41 HOPS complex subunit	218035	Chr13	+	18.7232	18.8666	UNC22202797	Chr13	18.5588	17.0146	19.3629	7.99833	13.3964	Cis
17285488	Amph	amphiphysin	218038	Chr13	+	18.9484	19.1507	JAX00351791	Chr13	19.6583	17.1128	19.6618	8.03809	25.9226	Cis
17285488	Amph	amphiphysin	218038	Chr13	+	18.9484	19.1507	UNC7567699	Chr4	78.8147	52.9128	81.3331	8.03809	9.7859	Trans
17285586	Aoah	acyloxyacyl hydrolase	27052	Chr13	+	20.7941	21.0239	UNC22229959	Chr13	20.3625	20.3354	21.0385	7.64992	15.882	Cis
17285631	Gpx6	glutathione peroxidase 6	75512	Chr13	+	21.3122	21.3196	UNC22248562	Chr13	21.6182	21.419	21.7196	8.95809	21.803	Cis
17285834	Hist1h2bg	histone cluster 1, H2bg	319181	Chr13	+	23.5714	23.572	UNC8229903	Chr4	131.171	125.028	132.944	7.80233	7.87073	Trans
17285834	Hist1h2bg	histone cluster 1, H2bg	319181	Chr13	+	23.5714	23.572	JAX00543241	Chr3	157.115	155.946	158.287	7.80233	8.55714	Trans
17286009	Tdp2	tyrosyl-DNA phosphodiesterase 2	56196	Chr13	+	24.8317	24.842	JAX00042767	Chr13	25.4942	24.8578	25.7451	7.75811	13.3587	Cis
17286055	Gpld1	glycosylphosphatidylinositol specific phospholipase D1	14756	Chr13	+	24.9432	24.9904	JAX00202291	Chr13	25.5331	22.9868	25.7451	8.22416	12.522	Cis
17286254	Mboat1	membrane bound O-acyltransferase domain containing 1	218121	Chr13	+	30.1366	30.2459	UNC22351311	Chr13	30.357	28.7375	31.179	7.66054	14.018	Cis
17286540	Gm16984	predicted gene, 16984	102640991	Chr13	+	34.964	34.9904	backupUNC190020296	Chr19	22.2739	19.4405	22.4119	7.56463	8.60058	Trans
17286540	Gm16984	predicted gene, 16984	102640991	Chr13	+	34.964	34.9904	UNC22401479	Chr13	34.8868	34.4293	34.9511	7.56463	22.6284	Cis
17286682	Bmp6	bone morphogenetic protein 6	12161	Chr13	+	38.3453	38.4999	UNC22456665	Chr13	39.0788	35.0889	39.6582	7.74686	12.4897	Cis
17286732	Tmem14c	transmembrane protein 14C	66154	Chr13	+	41.0163	41.0224	UNC22482244	Chr13	40.8578	40.6895	41.0816	8.29998	13.9369	Cis
17286870	Sirt5	sirtuin 5	68346	Chr13	+	43.3708	43.3949	UNC22515449	Chr13	43.8549	42.6046	45.2029	7.691	8.60914	Cis
17286882	Nol7	nucleolar protein 7	70078	Chr13	+	43.3984	43.4023	UNC22516137	Chr13	43.9035	43.3596	44.2335	7.77539	8.20948	Cis
17287005	Cap2	CAP, adenylate cyclase-associated protein, 2 (yeast)	67252	Chr13	+	46.5018	46.6494	UNC18963711	Chr10	127.835	127.826	129.159	7.92646	8.12455	Trans
17287041	Kdm1b	lysine (K)-specific demethylase 1B	218214	Chr13	+	47.0449	47.0838	UNC22554592	Chr13	47.3176	46.4423	47.5033	8.7864	12.9189	Cis
17287102	Fam120aos	family with sequence similarity 120A, opposite strand	68128	Chr13	+	48.9682	48.9719	UNC22585134	Chr13	51.3407	48.172	52.0107	7.63885	11.3264	Trans
17287325	S1pr3	sphingosine-1-phosphate receptor 3	13610	Chr13	+	51.4087	51.4217	UNC22585134	Chr13	51.3407	49.309	51.7624	7.69344	10.6301	Cis
17287466	Higd2a	HIG1 domain family, member 2A	67044	Chr13	+	54.5902	54.5911	UNC22637658	Chr13	54.844	53.4966	56.8903	7.98039	12.9405	Cis
17287486	Cdhr2	cadherin-related family member 2	268663	Chr13	+	54.7129	54.7366	UNC22634001	Chr13	54.4909	54.3275	54.6914	8.23087	15.9404	Cis
17287555	Unc5a	unc-5 netrin receptor A	107448	Chr13	+	54.9495	55.0055	UNC22637658	Chr13	54.844	54.844	56.2002	7.88922	13.4824	Cis
17287650	Rgs14	regulator of G-protein signaling 14	51791	Chr13	+	55.3698	55.3845	backupUNC130294653	Chr13	54.7897	54.163	55.7545	7.79213	9.49857	Cis
17287772	Pcbd2	pterin 4 alpha carbinolamine dehydratase/dimerization cofactor of hepatocyte nuclear factor 1 alpha (TCF1) 2	72562	Chr13	+	55.7329	55.7768	UNC22662546	Chr13	56.8118	54.1127	58.9955	7.738	8.03927	Cis
17287777	Catsper3	cation channel, sperm associated 3	76856	Chr13	+	55.7846	55.809	UNC4153332	Chr2	145.189	135.905	146.727	7.78808	8.32108	Trans
17287827	Tgfbi	transforming growth factor, beta induced	21810	Chr13	+	56.6096	56.6395	UNC29504733	Chr18	68.1517	66.3529	69.5344	8.04518	8.20695	Trans
17288145	Habp4	hyaluronic acid binding protein 4	56541	Chr13	+	64.1619	64.1857	UNC22747550	Chr13	63.7336	60.4205	64.7878	7.6146	8.33874	Cis
17288269	Gm10767	predicted gene 10767	100038538	Chr13	+	66.905	66.9079	UNC22694091	Chr13	58.9133	55.4428	71.1468	7.97092	8.18695	Trans
17288716	Glrx	glutaredoxin	93692	Chr13	+	75.8399	75.8501	UNC22889255	Chr13	76.383	74.0933	76.383	7.79325	15.7762	Cis
17288732	Ttc37	tetratricopeptide repeat domain 37	218343	Chr13	+	76.0988	76.1897	UNC22885849	Chr13	76.1562	74.3974	76.383	7.64277	14.2344	Cis
17289085	Dhfr	dihydrofolate reductase	13361	Chr13	+	92.3548	92.3869	JAX00047491	Chr13	90.0944	87.489	90.4404	8.9733	9.91874	Trans
17289163	Dmgdh	dimethylglycine dehydrogenase precursor	74129	Chr13	+	93.687	93.7525	UNC29353201	Chr18	58.6086	57.6311	60.3623	7.93314	8.85275	Trans
17289163	Dmgdh	dimethylglycine dehydrogenase precursor	74129	Chr13	+	93.687	93.7525	UNC23081060	Chr13	91.3762	90.4404	93.7822	7.93314	11.3064	Trans
17289181	Arsb	arylsulfatase B	11881	Chr13	+	93.7717	93.9423	UNC23081060	Chr13	91.3762	91.3439	93.4191	8.50751	24.3097	Trans
17289249	Wdr41	WD repeat domain 41	218460	Chr13	+	94.9764	95.0227	UNC23131884	Chr13	95.0831	94.7584	95.3509	8.26855	8.33729	Cis
17289271	Zbed3	zinc finger, BED type containing 3	72114	Chr13	+	95.3252	95.3378	UNC23176136	Chr13	97.7576	95.2343	98.2545	7.66583	9.5388	Trans
17289275	Snora47	small nucleolar RNA, H/ACA box 47	100217450	Chr13	+	95.3306	95.3307	UNC23135263	Chr13	95.3255	95.2343	95.3509	10.0854	17.44	Cis
17289324	Gcnt4	glucosaminyl (N-acetyl) transferase 4, core 2 (beta-1,6-N-acetylglucosaminyltransferase)	218476	Chr13	+	96.9247	96.9501	UNC23169709	Chr13	97.3502	96.4168	98.2141	7.77848	10.9962	Cis
17289439	Mrps27	mitochondrial ribosomal protein S27	218506	Chr13	+	99.3448	99.4154	UNC23201878	Chr13	99.4505	99.3236	99.5641	9.25815	12.5419	Cis
17289699	Ercc8	excision repaiross-complementing rodent repair deficiency, complementation group 8	71991	Chr13	+	108.159	108.194	UNC23323454	Chr13	108.282	108.077	110.399	7.74936	8.16375	Cis
17289728	Depdc1b	DEP domain containing 1B	218581	Chr13	+	108.316	108.389	UNC23328498	Chr13	108.567	108.041	108.64	7.65224	10.9035	Cis
17289864	Ankrd55	ankyrin repeat domain 55	77318	Chr13	+	112.288	112.384	UNC5074017	Chr3	38.4422	37.9014	38.9481	8.0042	8.10638	Trans
17289889	Il6st	interleukin 6 signal transducer	16195	Chr13	+	112.473	112.505	UNC23381243	Chr13	111.818	110.608	112.504	8.13307	10.6645	Cis
17289928	Plpp1	phospholipid phosphatase 1	19012	Chr13	+	112.801	112.868	JAX00498023	Chr2	102.299	92.8854	104.144	7.68764	8.49652	Trans
17290083	Emb	embigin	13723	Chr13	+	117.221	117.274	UNC23465812	Chr13	117.095	116.909	117.824	8.71487	14.4838	Cis
17290121	Paip1	polyadenylate binding protein-interacting protein 1	218693	Chr13	+	119.429	119.46	UNC23498994	Chr13	119.493	110.608	119.493	7.75064	8.38156	Cis
17290139	4833420G17Rik	RIKEN cDNA 4833420G17 gene	67392	Chr13	+	119.463	119.486	UNC23498301	Chr13	119.452	119.277	119.481	7.75995	33.1356	Cis
17290155	Tmem267	transmembrane protein 267	633640	Chr13	+	119.488	119.61	UNC23498994	Chr13	119.493	119.076	119.493	7.66325	13.215	Cis
17290173	Hmgcs1	3-hydroxy-3-methylglutaryl-Coenzyme A synthase 1	208715	Chr13	+	119.69	119.708	UNC23498166	Chr13	119.438	119.393	119.46	7.57143	18.2649	Cis
17290288	Akr1c20	aldo-keto reductase family 1, member C20	116852	Chr13	-	4.48704	4.5127	UNC22038441	Chr13	4.75253	3.1877	5.57795	7.84657	8.60257	Cis
17290301	Akr1e1	aldo-keto reductase family 1, member E1	56043	Chr13	-	4.59296	4.60915	UNC040699444	Chr4	146.494	145.092	148.004	7.62017	17.6981	Trans
17290324	Pfkp	phosphofructokinase, platelet	56421	Chr13	-	6.57977	6.64871	JAX00349390	Chr13	6.98362	4.20051	10.5943	7.5496	15.7439	Cis
17290447	Chrm3	cholinergic receptor, muscarinic 3, cardiac	12671	Chr13	-	9.8767	10.3605	UNC30383779	Chr19	45.4653	45.3324	46.2555	7.73511	9.82127	Trans
17290457	Ryr2	ryanodine receptor 2, cardiac	20191	Chr13	-	11.5541	12.1066	UNC22133739	Chr13	12.0108	11.8774	12.0575	7.68245	19.1773	Cis
17290655	Gpr137b-ps	G protein-coupled receptor 137B, pseudogene	664862	Chr13	-	12.6148	12.6213	UNC22163382	Chr13	15.245	12.12	15.721	8.04542	18.2551	Trans
17290695	Gpr137b	G protein-coupled receptor 137B	83924	Chr13	-	13.3582	13.361	UNC130013342	Chr13	12.5354	12.1448	13.5186	7.65846	20.6485	Cis
17290781	Sugct	succinyl-CoA glutarate-CoA transferase	192136	Chr13	-	16.8579	17.6726	UNC22186716	Chr13	17.257	16.1039	18.1549	7.92059	13.0002	Cis
17290865	Epdr1	ependymin related protein 1 (zebrafish)	105298	Chr13	-	19.5921	19.6198	UNC22213838	Chr13	19.3629	17.426	19.6618	7.74477	14.5084	Cis
17290939	Pgbd1	piggyBac transposable element derived 1	319207	Chr13	-	21.4213	21.441	UNC270452	Chr1	22.8438	20.0839	24.8132	8.9272	9.1167	Trans
17290987	Olfr1362	olfactory receptor 1362	258739	Chr13	-	21.6111	21.6119	UNC21413875	Chr12	74.9775	73.7199	75.0084	7.84437	8.48849	Trans
17291053	Hist1h4i	histone cluster 1, H4i	319158	Chr13	-	22.0408	22.041	UNC22254426	Chr13	22.2242	21.9101	22.4199	8.07975	19.2999	Cis
17291057	Hist1h2ag	histone cluster 1, H2ag	319167	Chr13	-	22.0425	22.0425	UNC26488701	Chr16	24.353	23.2255	24.3739	9.14592	9.47494	Trans
17291211	Hfe	hemochromatosis	15216	Chr13	-	23.7023	23.7108	UNC22271285	Chr13	24.1655	22.6799	24.8578	7.65135	11.1384	Cis
17291241	Slc17a4	solute carrier family 17 (sodium phosphate), member 4	319848	Chr13	-	23.8977	23.915	UNC22264104	Chr13	23.7119	23.0589	24.3713	7.95234	15.5121	Cis
17291343	Gmnn	geminin	57441	Chr13	-	24.752	24.7619	UNC22274725	Chr13	24.4039	23.0589	26.0954	7.86797	13.0101	Cis
17291355	Acot13	acyl-CoA thioesterase 13	66834	Chr13	-	24.818	24.8315	UNC22286225	Chr13	25.1954	24.8735	25.6795	7.85257	13.2481	Cis
17291534	Cdkal1	CDK5 regulatory subunit associated protein 1-like 1	68916	Chr13	-	29.3255	29.8557	UNC22978179	Chr13	83.8909	27.1361	84.4612	8.18537	9.11722	Trans
17291613	4930401O12Rik	RIKEN cDNA 4930401O12 gene	73924	Chr13	-	31.2135	31.2411	UNC9533394	Chr5	78.8288	77.2189	79.983	7.89512	8.70537	Trans
17291653	Gmds	GDP-mannose 4, 6-dehydratase	218138	Chr13	-	31.8197	32.3386	UNC22372722	Chr13	32.2041	26.9134	34.2129	7.72829	7.93134	Cis
17291854	Rpp40	ribonuclease P 40 subunit	208366	Chr13	-	35.8941	35.9063	JAX00355250	Chr13	37.3152	35.839	37.3152	7.92074	11.9639	Cis
17291915	Cage1	cancer antigen 1	71213	Chr13	-	38.0061	38.0371	JAX00355250	Chr13	37.3152	35.839	38.1917	7.70376	12.6444	Cis
17292058	Elovl2	elongation of very long chain fatty acids (FEN1/Elo2, SUR4/Elo3, yeast)-like 2	54326	Chr13	-	41.1832	41.2204	UNC22486452	Chr13	41.1986	41.1722	41.375	9.98321	12.6087	Cis
17292258	Nhlrc1	NHL repeat containing 1	105193	Chr13	-	47.0126	47.0145	UNC22424014	Chr13	36.7824	25.571	47.1972	7.822	8.0017	Trans
17292312	A330048O09Rik	RIKEN cDNA A330048O09 gene	320315	Chr13	-	48.2724	48.2739	UNC22595169	Chr13	52.0107	48.172	52.2236	7.75269	10.2146	Trans
17292640	Ror2	receptor tyrosine kinase-like orphan receptor 2	26564	Chr13	-	53.1106	53.286	UNC22638400	Chr13	54.8915	52.2876	58.0135	7.77597	8.00656	Cis
17292689	Thoc3	THO complex 3	73666	Chr13	-	54.4591	54.4687	UNC22636527	Chr13	54.7471	53.3631	54.8915	7.65461	23.2649	Cis
17292769	Gm16249	predicted gene 16249	102633259	Chr13	-	54.7775	54.7827	UNC3389776	Chr2	78.4895	77.0223	83.8129	8.14627	9.5474	Trans
17292850	Pfn3	profilin 3	75477	Chr13	-	55.4089	55.4152	UNC22646490	Chr13	55.7202	54.7471	57.1685	8.87435	11.3298	Cis
17293006	Cxcl14	chemokine (C-X-C motif) ligand 14	57266	Chr13	-	56.2887	56.2965	UNC22650340	Chr13	56.0286	55.8515	56.9668	7.55773	8.18919	Cis
17293089	Ubqln1	ubiquilin 1	56085	Chr13	-	58.1771	58.2155	JAX00360815	Chr13	62.9983	60.2494	66.2283	7.78683	9.60445	Trans
17293103	Gkap1	G kinase anchoring protein 1	56278	Chr13	-	58.2334	58.2642	UNC22699875	Chr13	59.297	57.397	63.5811	7.84368	8.6596	Cis
17293103	Gkap1	G kinase anchoring protein 1	56278	Chr13	-	58.2334	58.2642	UNC28164438	Chr17	63.0363	62.8225	67.7582	7.84368	8.19427	Trans
17293142	Hnrnpk	heterogeneous nuclear ribonucleoprotein K	15387	Chr13	-	58.3916	58.4033	UNC27115551	Chr16	73.7723	73.0955	82.656	7.71466	8.36083	Trans
17293547	Fbp2	fructose bisphosphatase 2	14120	Chr13	-	62.8369	62.8584	UNC22729985	Chr13	61.5053	58.0769	62.96	7.60438	10.4077	Cis
17293650	Slc35d2	solute carrier family 35, member D2	70484	Chr13	-	64.0969	64.1293	UNC22748974	Chr13	63.8566	60.0339	68.5638	8.02609	8.08319	Cis
17293675	Cdc14b	CDC14 cell division cycle 14B	218294	Chr13	-	64.1937	64.275	UNC22752285	Chr13	64.1299	63.874	64.5682	7.69926	12.2583	Cis
17293706	Ctsl	cathepsin L	13039	Chr13	-	64.3635	64.3703	UNC22755582	Chr13	64.3791	61.0449	64.7878	9.11141	14.3209	Cis
17293748	Prss47	protease, serine 47	218304	Chr13	-	65.0447	65.0527	JAX00325386	Chr12	10.372	6.00011	12.0018	7.98797	8.96116	Trans
17293870	Mterf3	mitochondrial transcription termination factor 3	66410	Chr13	-	66.907	66.9331	UNC22765315	Chr13	65.1101	64.8399	66.8636	7.74203	8.25912	Cis
17293897	Zfp712	zinc finger protein 712	78251	Chr13	-	67.0387	67.0611	JAX00576291	Chr5	23.9059	21.7161	24.5768	7.64739	7.86263	Trans
17293928	Zfp457	zinc finger protein 457	431706	Chr13	-	67.2927	67.2941	UNC22776845	Chr13	67.651	64.8974	70.091	7.89138	9.29528	Cis
17294023	Zfp738	zinc finger protein 738	408068	Chr13	-	67.6677	67.6871	UNC22749490	Chr13	63.9224	63.5631	67.2139	7.93278	10.8666	Trans
17294066	Mtrr	5-methyltetrahydrofolate-homocysteine methyltransferase reductase	210009	Chr13	-	68.5621	68.5821	UNC22781328	Chr13	68.5638	67.9135	69.2728	7.77081	17.9083	Cis
17294135	Srd5a1	steroid 5 alpha-reductase 1	78925	Chr13	-	69.5737	69.6148	UNC22820197	Chr13	71.0117	68.1668	71.0977	7.85116	10.9492	Cis
17294324	Cep72	centrosomal protein 72	74470	Chr13	-	74.0381	74.0595	backupUNC131047427	Chr13	75.2815	73.8992	76.383	7.84323	8.72877	Cis
17294421	Cast	calpastatin	12380	Chr13	-	74.6943	74.8079	backupUNC131047427	Chr13	75.2815	72.9102	75.4176	7.77111	9.20417	Cis
17294458	Rhobtb3	Rho-related BTB domain containing 3	73296	Chr13	-	75.8699	75.9437	UNC22879993	Chr13	75.5972	74.294	76.383	7.65301	9.00686	Cis
17294489	Arsk	arylsulfatase K	77041	Chr13	-	76.0605	76.0986	UNC22878136	Chr13	75.4176	74.0933	76.1562	7.87083	12.8821	Cis
17294775	Atp6ap1l	ATPase, H+ transporting, lysosomal accessory protein 1-like	435376	Chr13	-	90.8835	90.9054	JAX00062135	Chr15	53.9617	53.939	54.1799	10.4542	11.0326	Trans
17294805	Zcchc9	zinc finger, CCHC domain containing 9	69085	Chr13	-	91.7969	91.8077	UNC23084877	Chr13	91.697	91.3939	93.742	7.68935	8.88486	Cis
17295125	F2rl1	coagulation factor II (thrombin) receptor-like 1	14063	Chr13	-	95.5124	95.5252	UNC23140641	Chr13	95.6223	94.7874	96.3023	7.8482	8.85552	Cis
17295130	F2r	coagulation factor II (thrombin) receptor	14062	Chr13	-	95.6019	95.6184	UNC23146461	Chr13	95.9132	94.7874	96.4168	7.82771	8.99986	Cis
17295136	Iqgap2	IQ motif containing GTPase activating protein 2	544963	Chr13	-	95.628	95.8918	UNC23146461	Chr13	95.9132	95.6821	97.0477	7.53589	10.1127	Cis
17295177	Sv2c	synaptic vesicle glycoprotein 2c	75209	Chr13	-	95.9598	96.1325	UNC7123807	Chr4	41.7061	41.3285	43.9542	7.86374	7.97646	Trans
17295270	Nsa2	NSA2 ribosome biogenesis homolog	59050	Chr13	-	97.13	97.1379	JAX00048003	Chr13	96.9472	95.741	97.4394	7.76464	10.4087	Cis
17295295	5330416C01Rik	RIKEN cDNA 5330416C01 gene	403201	Chr13	-	97.7336	97.7474	JAX00367245	Chr13	96.3971	95.9132	98.2545	7.77575	8.7959	Cis
17295308	Arhgef28	Rho guanine nucleotide exchange factor (GEF) 28	110596	Chr13	-	97.8994	98.2061	JAX00047934	Chr13	96.0299	95.8699	98.3164	7.87576	11.086	Cis
17295394	Fcho2	FCH domain only 2	218503	Chr13	-	98.7257	98.8154	JAX00555255	Chr4	78.5313	78.2532	84.0136	7.62934	8.23965	Trans
17295649	Gtf2h2	general transcription factor II H, polypeptide 2	23894	Chr13	-	100.469	100.493	UNC23221068	Chr13	100.792	100.326	101.019	7.65829	20.9369	Cis
17295649	Gtf2h2	general transcription factor II H, polypeptide 2	23894	Chr13	-	100.469	100.493	UNC17193593	Chr9	115.701	114.768	116.43	7.65829	9.00972	Trans
17295796	Pik3r1	phosphoinositide-3-kinase regulatory subunit 1	18708	Chr13	-	101.681	101.768	UNC30710710	ChrX	19.4749	12.4435	23.9937	7.64351	7.93312	Trans
17295877	Erbin	Erbb2 interacting protein	59079	Chr13	-	103.821	103.92	UNC22607334	Chr13	52.7394	52.1035	107.055	8.02427	8.09136	Trans
17295907	Nln	neurolysin (metallopeptidase M3 family)	75805	Chr13	-	104.023	104.11	JAX00368930	Chr13	104.129	102.992	104.674	8.03748	11.3229	Cis
17295944	Ppwd1	peptidylprolyl isomerase domain and WD repeat containing 1	238831	Chr13	-	104.205	104.229	UNC23269131	Chr13	104.299	104.246	104.568	7.78872	16.8895	Cis
17295987	Rgs7bp	regulator of G-protein signalling 7 binding protein	52882	Chr13	-	104.948	105.055	JAX00369070	Chr13	104.955	104.246	108.54	7.71416	8.36433	Cis
17296304	4921509O07Rik	RIKEN cDNA 4921509O07 gene	70917	Chr13	-	113.446	113.503	UNC25580237	Chr15	51.4997	50.3081	51.5688	7.68404	8.57761	Trans
17296388	Itga1	integrin alpha 1	109700	Chr13	-	114.96	115.102	JAX00049452	Chr13	116.26	114.118	116.818	7.47633	7.75947	Cis
17296476	Mrps30	mitochondrial ribosomal protein S30	59054	Chr13	-	118.38	118.387	UNC23487565	Chr13	118.513	118.075	119.385	8.41322	10.8876	Cis
17296489	Nnt	nicotinamide nucleotide transhydrogenase	18115	Chr13	-	119.335	119.409	UNC23494457	Chr13	119.111	118.679	119.468	8.85038	14.1949	Cis
17296836	Gm3239	predicted gene 3239	100041262	Chr14	+	4.65012	4.65019	UNC23669266	Chr14	20.9663	7.7053	21.2784	7.7662	14.2609	Trans
17296973	LOC102636792	uncharacterized LOC102636792	102636792	Chr14	+	5.48055	5.48422	JAX00372194	Chr14	8.14357	7.7053	9.49813	8.04212	9.00993	Trans
17297059	Abhd6	abhydrolase domain containing 6	66082	Chr14	+	8.00294	8.05641	JAX00372157	Chr14	7.96692	7.7053	10.2193	7.77069	9.054	Cis
17297080	Pxk	PX domain containing serine/threonine kinase	218699	Chr14	+	8.09835	8.1648	JAX00372887	Chr14	11.2318	8.14357	16.3567	7.63031	9.08205	Trans
17297100	Kctd6	potassium channel tetramerisation domain containing 6	71393	Chr14	+	8.21462	8.2235	JAX00049833	Chr14	8.24914	7.7053	8.94365	7.64028	8.65025	Cis
17297125	Ptprg	protein tyrosine phosphatase, receptor type, G	19270	Chr14	+	11.554	12.2399	JAX00050046	Chr14	11.1099	10.7609	11.2318	7.56026	19.8887	Cis
17297299	B230110C06Rik	RIKEN cDNA B230110C06 gene	77981	Chr14	+	15.4376	15.4524	UNC551425	Chr1	43.3	42.7586	45.7699	8.59275	9.09636	Trans
17297576	Adk	adenosine kinase	11534	Chr14	+	21.0526	21.4485	JAX00067350	Chr16	23.1835	22.8196	23.7281	9.27743	9.90274	Trans
17297627	Samd8	sterile alpha motif domain containing 8	67630	Chr14	+	21.7505	21.7974	UNC23681697	Chr14	21.9238	21.5187	22.4819	8.18515	11.4244	Cis
17297746	Mir3075	microRNA 3075	100526533	Chr14	+	25.5344	25.5345	UNC23729559	Chr14	26.2948	25.4148	26.6316	7.76685	20.0284	Cis
17297923	Dnah12	dynein, axonemal, heavy chain 12	110083	Chr14	+	26.6934	26.8917	UNC23737885	Chr14	27.0268	25.6757	27.3271	7.87994	11.682	Cis
17298090	Erc2	ELKS/RAB6-interacting/CAST family member 2	238988	Chr14	+	27.6226	28.476	UNC23776184	Chr14	29.9144	28.0853	31.3077	7.67728	13.3144	Trans
17298090	Erc2	ELKS/RAB6-interacting/CAST family member 2	238988	Chr14	+	27.6226	28.476	UNC18782379	Chr10	115.772	115.462	115.892	7.67728	8.38545	Trans
17298379	Tnnc1	troponin C, cardiac/slow skeletal	21924	Chr14	+	31.2083	31.2117	UNC23870122	Chr14	37.0564	36.5566	57.8832	7.81242	8.01043	Trans
17298387	Sema3g	sema domain, immunoglobulin domain (Ig), short basic domain, secreted, (semaphorin) 3G	218877	Chr14	+	31.2179	31.2302	UNC23771301	Chr14	29.5638	27.8039	31.3077	7.6993	13.3881	Cis
17298556	Ogdhl	oxoglutarate dehydrogenase-like	239017	Chr14	+	32.322	32.3477	UNC23811717	Chr14	32.8717	27.8992	33.5407	7.69275	12.1709	Cis
17298731	Gdf10	growth differentiation factor 10	14560	Chr14	+	33.9236	33.9363	UNC23831316	Chr14	34.0851	33.7188	36.5955	7.80913	12.7704	Cis
17298731	Gdf10	growth differentiation factor 10	14560	Chr14	+	33.9236	33.9363	UNC4391797	Chr2	163.651	163.466	163.919	7.80913	8.16463	Trans
17298823	Gm3219	B-cell CLL/lymphoma 7C pseudogene	100041231	Chr14	+	34.3452	34.3453	UNC23835921	Chr14	34.3656	34.0532	34.593	7.94712	16.107	Cis
17298910	Lrit1	leucine-rich repeat, immunoglobulin-like and transmembrane domains 1	239037	Chr14	+	37.0548	37.0642	UNC23847951	Chr14	35.2947	34.5241	36.811	8.40736	11.6262	Cis
17298946	Dydc1	DPY30 domain containing 1	69496	Chr14	+	41.0729	41.0922	UNC30578471	Chr19	58.4677	58.1848	59.3497	7.99647	8.04957	Trans
17299174	Gm16976	predicted gene, 16976	102637302	Chr14	+	44.859	44.9744	UNC24907279	Chr14	121.203	121.023	121.353	7.75095	8.08697	Trans
17299250	Gm15217	predicted gene 15217	100041724	Chr14	+	46.3794	46.3835	UNC23949514	Chr14	46.3811	46.1001	46.5015	7.73058	15.1799	Cis
17299535	Gm26782	predicted gene, 26782	102640338	Chr14	+	50.8704	50.8772	UNC23984819	Chr14	49.5396	48.7621	56.4681	7.90697	8.88419	Cis
17299644	Mettl17	methyltransferase like 17	52535	Chr14	+	51.8849	51.8918	backupUNC090188167	Chr9	94.6944	92.5131	94.9078	7.79676	8.67109	Trans
17300181	Trav9d-3	T cell receptor alpha variable 9D-3	100038850	Chr14	+	54.1838	54.1838	UNC25613620	Chr15	53.939	53.939	54.2146	7.8147	8.30742	Trans
17300225	Trav14d-3-dv8	T cell receptor alpha variable 14D-3-DV8	634322	Chr14	+	54.2066	54.2066	UNC24040120	Chr14	55.4428	49.2111	56.6296	7.9236	10.7469	Cis
17300544	Fitm1	fat storage-inducing transmembrane protein 1	68680	Chr14	+	55.5757	55.577	UNC24040504	Chr14	55.4815	55.4815	56.7961	9.59072	27.0273	Cis
17300608	Rec8	REC8 meiotic recombination protein	56739	Chr14	+	55.6181	55.6254	JAX00033679	Chr12	17.2803	16.646	21.2203	7.75713	11.792	Trans
17300802	Parp4	poly (ADP-ribose) polymerase family, member 4	328417	Chr14	+	56.5757	56.6593	UNC24048237	Chr14	56.4681	55.6491	56.7961	7.69376	10.7671	Cis
17301061	Mipep	mitochondrial intermediate peptidase	70478	Chr14	+	60.7846	60.9053	UNC24097140	Chr14	62.3822	60.7007	63.675	7.894	11.7554	Cis
17301131	Rnaseh2b	ribonuclease H2, subunit B	67153	Chr14	+	62.2926	62.3726	UNC24100424	Chr14	62.5551	60.8639	63.3813	7.60912	15.7109	Cis
17301147	Fam124a	family with sequence similarity 124, member A	629059	Chr14	+	62.5559	62.6083	UNC24090838	Chr14	61.8363	60.758	63.7595	7.681	9.9732	Cis
17301147	Fam124a	family with sequence similarity 124, member A	629059	Chr14	+	62.5559	62.6083	JAX00022574	Chr10	114.375	114.25	114.996	7.681	8.17949	Trans
17301213	Ctsb	cathepsin B	13030	Chr14	+	63.1333	63.1458	UNC24109881	Chr14	63.234	63.1043	65.8727	8.66353	9.64149	Cis
17301247	Pinx1	PIN2/TERF1 interacting, telomerase inhibitor 1	72400	Chr14	+	63.8604	63.9198	UNC24117994	Chr14	63.9147	61.697	65.8727	7.56125	7.94941	Cis
17301342	Ints9	integrator complex subunit 9	210925	Chr14	+	64.9502	65.0397	UNC24124897	Chr14	64.559	64.031	65.8727	7.90848	8.97515	Cis
17301365	Fbxo16	F-box protein 16	50759	Chr14	+	65.2667	65.3234	UNC24123981	Chr14	64.454	64.031	67.9717	7.75097	8.0946	Cis
17301440	Ccdc25	coiled-coil domain containing 25	67179	Chr14	+	65.8373	65.866	UNC24173459	Chr14	68.1436	62.8766	69.706	7.71019	10.6485	Trans
17301452	Clu	clusterin	12759	Chr14	+	65.9685	65.9815	UNC24123981	Chr14	64.454	62.9276	67.9717	7.3146	8.49155	Cis
17301489	Stmn4	stathmin-like 4	56471	Chr14	+	66.3443	66.3614	UNC11907015	Chr6	115.518	107.709	119.003	7.87025	7.8788	Trans
17301647	Entpd4b	ectonucleoside triphosphate diphosphohydrolase 4B	100862375	Chr14	+	69.568	69.5682	backupUNC140239235	Chr14	69.7257	68.9226	70.0302	7.62288	30.6117	Cis
17301738	Phyhip	phytanoyl-CoA hydroxylase interacting protein	105653	Chr14	+	70.4575	70.4681	UNC24201943	Chr14	70.5091	70.3838	70.5405	7.79023	13.6163	Cis
17301823	Gfra2	glial cell line derived neurotrophic factor family receptor alpha 2	14586	Chr14	+	70.8902	70.9798	UNC24232002	Chr14	72.9433	69.1748	74.3037	7.72348	15.9454	Trans
17301890	Med4	mediator complex subunit 4	67381	Chr14	+	73.5101	73.5185	UNC24320768	Chr14	79.4735	77.232	81.0085	7.76752	7.82587	Trans
17301926	Htr2a	5-hydroxytryptamine (serotonin) receptor 2A	15558	Chr14	+	74.6409	74.7067	UNC24232629	Chr14	72.9915	72.8136	74.6106	7.72691	11.804	Cis
17301932	Esd	esterase D/formylglutathione hydrolase	13885	Chr14	+	74.7324	74.7501	UNC24226675	Chr14	72.4758	71.1114	76.8034	8.16676	11.2039	Trans
17301995	Cpb2	carboxypeptidase B2 (plasma)	56373	Chr14	+	75.2423	75.2836	UNC24255944	Chr14	74.6106	73.0473	76.2451	7.76236	17.9179	Cis
17302113	Enox1	ecto-NOX disulfide-thiol exchanger 1	239188	Chr14	+	77.1568	77.7217	UNC24292975	Chr14	77.1891	77.1674	78.7844	7.70239	7.91383	Cis
17302213	Mtrf1	mitochondrial translational release factor 1	211253	Chr14	+	79.3978	79.4236	UNC24322186	Chr14	79.6225	71.1114	79.6225	7.89424	8.5379	Cis
17302279	Olfm4	olfactomedin 4	380924	Chr14	+	80.0004	80.0226	UNC24333521	Chr14	80.9115	79.6579	81.9109	8.44883	11.8185	Cis
17302289	Pcdh17	protocadherin 17	219228	Chr14	+	84.4441	84.537	UNC19567100	Chr11	47.3962	47.0572	53.3495	7.63977	8.3892	Trans
17302289	Pcdh17	protocadherin 17	219228	Chr14	+	84.4441	84.537	UNC24349893	Chr14	82.1341	82.047	87.863	7.63977	7.78804	Trans
17302483	Cln5	ceroid-lipofuscinosis, neuronal 5	211286	Chr14	+	103.07	103.078	UNC24643714	Chr14	102.919	102.548	103.431	7.74274	13.0335	Cis
17302490	Scel	sciellin	64929	Chr14	+	103.529	103.613	JAX00485272	Chr2	24.5413	24.1355	30.6468	9.2434	11.1227	Trans
17302747	Hs6st3	heparan sulfate 6-O-sulfotransferase 3	50787	Chr14	+	119.138	119.87	UNC24874356	Chr14	119.084	118.678	119.357	7.63212	13.6686	Cis
17302802	Farp1	FERM, RhoGEF (Arhgef) and pleckstrin domain protein 1 (chondrocyte-derived)	223254	Chr14	+	121.036	121.282	UNC16034567	Chr9	26.2687	25.4178	27.5296	7.65756	7.78146	Trans
17302802	Farp1	FERM, RhoGEF (Arhgef) and pleckstrin domain protein 1 (chondrocyte-derived)	223254	Chr14	+	121.036	121.282	UNC24889354	Chr14	120.054	119.456	120.345	7.65756	8.4375	Cis
17302832	B930095G15Rik	RIKEN cDNA B930095G15 gene	320268	Chr14	+	121.249	121.251	UNC24908746	Chr14	121.274	120.264	124.607	7.69411	10.0473	Cis
17303041	Gm3248	predicted gene 3248	100041279	Chr14	-	5.85864	5.94302	UNC3679935	Chr2	104.346	104.217	106.069	8.72171	9.20337	Trans
17303147	Gm3636	predicted gene 3636	100041151	Chr14	-	6.42596	6.426	UNC23654644	Chr14	19.6892	19.6277	21.2784	7.86621	12.2709	Trans
17303433	Fam107a	family with sequence similarity 107, member A	268709	Chr14	-	8.29656	8.31789	JAX00372254	Chr14	8.36978	7.7053	8.75683	7.73147	10.9836	Cis
17303453	4930452B06Rik	RIKEN cDNA 4930452B06 gene	74430	Chr14	-	8.43135	8.66623	JAX00372254	Chr14	8.36978	8.14357	9.1723	7.75902	14.2486	Cis
17303548	Gm281	predicted gene 281	238939	Chr14	-	13.815	13.9052	JAX00131648	Chr5	73.8858	73.6585	75.1283	12.4628	12.9348	Trans
17303568	Thoc7	THO complex 7	66231	Chr14	-	13.9492	13.9546	UNC140436816	Chr14	14.74	12.4582	16.5776	8.08885	10.7119	Cis
17303695	Rtraf	RNA transcription, translation and transport factor	68045	Chr14	-	19.8117	19.8237	UNC23668700	Chr14	20.9016	7.7053	22.0584	7.68795	9.93808	Cis
17303804	Anxa7	annexin A7	11750	Chr14	-	20.4557	20.4801	UNC23669266	Chr14	20.9663	7.7053	21.5187	7.83103	11.1315	Cis
17303821	Mss51	MSS51 mitochondrial translational activator	74843	Chr14	-	20.4829	20.4969	UNC23655264	Chr14	19.7396	19.4058	20.787	7.7493	11.2984	Cis
17304010	Kcnma1	potassium large conductance calcium-activated channel, subfamily M, alpha member 1	16531	Chr14	-	23.2924	23.2935	UNC23697250	Chr14	23.2958	23.0292	23.6364	7.64831	9.28617	Cis
17304012	Kcnma1	potassium large conductance calcium-activated channel, subfamily M, alpha member 1	16531	Chr14	-	23.2995	24.0038	UNC140103700	Chr14	23.7897	23.747	23.8515	7.71294	18.4603	Cis
17304246	Appl1	adaptor protein, phosphotyrosine interaction, PH domain and leucine zipper containing 1	72993	Chr14	-	26.9194	26.9708	UNC23804378	Chr14	32.3476	28.9361	33.6112	7.638	10.6611	Trans
17304461	Itih1	inter-alpha trypsin inhibitor, heavy chain 1	16424	Chr14	-	30.9292	30.9432	JAX00376536	Chr14	31.24	29.9144	31.3973	7.70716	18.5316	Cis
17304518	Smim4	small integral membrane protein 4	66487	Chr14	-	31.0889	31.1289	UNC23761900	Chr14	28.8785	27.9446	30.8793	7.79556	13.8951	Trans
17304646	Phf7	PHD finger protein 7	71838	Chr14	-	31.2379	31.251	JAX00376264	Chr14	29.7552	28.1411	31.5658	7.66584	9.84386	Cis
17304794	Hacl1	2-hydroxyacyl-CoA lyase 1	56794	Chr14	-	31.6074	31.641	UNC23802871	Chr14	32.2082	29.0176	33.3904	8.20701	13.2154	Cis
17305221	Fam213a	family with sequence similarity 213, member A	70564	Chr14	-	40.9938	41.0138	JAX00204805	Chr14	44.8294	39.7522	44.8485	7.78582	9.69214	Trans
17305235	Dydc2	DPY30 domain containing 2	71200	Chr14	-	41.0492	41.0692	UNC23907176	Chr14	39.4813	37.7977	41.2309	8.41241	11.1783	Cis
17305830	Otx2	orthodenticle homeobox 2	18424	Chr14	-	48.6577	48.6676	JAX00485435	Chr2	25.226	24.813	25.5904	8.45931	8.6286	Trans
17305856	Exoc5	exocyst complex component 5	105504	Chr14	-	49.0127	49.0666	backupUNC140210413	Chr14	54.3334	39.3158	55.2368	7.83327	11.6542	Trans
17305980	Ccnb1ip1	cyclin B1 interacting protein 1	239083	Chr14	-	50.7894	50.7957	UNC23998790	Chr14	51.0479	49.4612	51.8937	7.85699	11.6235	Cis
17305988	Tep1	telomerase associated protein 1	21745	Chr14	-	50.8242	50.8704	JAX00380214	Chr14	52.6476	49.1739	54.2329	8.02502	12.107	Cis
17306098	Rnase1	ribonuclease, RNase A family, 1 (pancreatic)	19752	Chr14	-	51.145	51.1468	UNC24017068	Chr14	53.1349	49.0048	53.6846	7.58375	13.4917	Cis
17306147	Ndrg2	N-myc downstream regulated gene 2	29811	Chr14	-	51.9053	51.9134	UNC24006031	Chr14	51.812	47.767	54.2329	7.8898	8.69953	Cis
17306384	Haus4	HAUS augmin-like complex, subunit 4	219072	Chr14	-	54.5418	54.5543	UNC24041159	Chr14	55.58	47.2832	56.8686	9.21139	11.8737	Cis
17306501	Ppp1r3e	protein phosphatase 1, regulatory (inhibitor) subunit 3E	105651	Chr14	-	54.8727	54.8775	UNC24040120	Chr14	55.4428	54.6834	56.7961	7.71349	12.2923	Cis
17307096	Zmym5	zinc finger, MYM-type 5	219105	Chr14	-	56.7912	56.8117	UNC19648088	Chr11	53.9856	51.875	54.9056	7.97293	8.26081	Trans
17307151	Eef1akmt1	EEF1A alpha lysine methyltransferase 1	68043	Chr14	-	57.5497	57.5661	UNC24049278	Chr14	56.6043	55.3582	56.7961	7.75418	9.33917	Cis
17307690	Gm17116	predicted gene 17116	102640375	Chr14	-	64.1112	64.1146	UNC24118673	Chr14	63.9947	61.5408	65.8727	7.75966	8.67265	Cis
17307837	Ephx2	epoxide hydrolase 2, cytoplasmic	13850	Chr14	-	66.0846	66.1245	UNC24112526	Chr14	63.4274	62.5918	65.8727	8.19675	9.87215	Trans
17307897	1700001G11Rik	RIKEN cDNA 1700001G11 gene	69303	Chr14	-	66.2954	66.297	UNC050921285	Chr5	49.0835	45.5055	51.8587	7.80886	8.11202	Trans
17307991	Dock5	dedicator of cytokinesis 5	68813	Chr14	-	67.754	67.9334	UNC24171088	Chr14	67.9717	67.0259	69.1185	8.03178	11.1318	Cis
17308165	Gm27177	predicted gene 27177	102636146	Chr14	-	69.5818	69.6403	UNC24182633	Chr14	68.7013	68.3453	69.5988	7.38433	39.3586	Cis
17308182	Chmp7	charged multivesicular body protein 7	105513	Chr14	-	69.7171	69.7324	UNC24201943	Chr14	70.5091	69.0395	70.7099	8.08344	11.5039	Cis
17308361	Bmp1	bone morphogenetic protein 1	12153	Chr14	-	70.4749	70.5088	UNC24200998	Chr14	70.4322	66.9058	70.5272	7.58625	12.6908	Cis
17309065	Mzt1	mitotic spindle organizing protein 1	76789	Chr14	-	99.035	99.0461	UNC24654161	Chr14	104.117	92.4436	108.154	7.55472	7.90769	Trans
17309154	Kctd12	potassium channel tetramerisation domain containing 12	239217	Chr14	-	102.977	102.982	UNC24654302	Chr14	104.133	102.821	104.539	7.70643	13.1962	Cis
17309268	Ednrb	endothelin receptor type B	13618	Chr14	-	103.816	103.844	UNC24639795	Chr14	102.594	100.576	102.741	7.57026	10.2547	Cis
17309397	Tgds	TDP-glucose 4,6-dehydratase	76355	Chr14	-	118.113	118.133	UNC24859851	Chr14	118.289	117.893	118.4	7.6559	11.4912	Cis
17309482	Uggt2	UDP-glucose glycoprotein glucosyltransferase 2	66435	Chr14	-	118.986	119.099	UNC24873465	Chr14	119.036	118.925	119.25	7.79883	12.1027	Cis
17309528	Oxgr1	oxoglutarate (alpha-ketoglutarate) receptor 1	239283	Chr14	-	120.02	120.042	UNC24888654	Chr14	120.014	119.338	120.345	7.78818	8.59289	Cis
17309557	Slc15a1	solute carrier family 15 (oligopeptide transporter), member 1	56643	Chr14	-	121.46	121.491	UNC24917017	Chr14	121.738	121.076	122.963	7.61653	12.5945	Cis
17309580	Dock9	dedicator of cytokinesis 9	105445	Chr14	-	121.542	121.798	UNC24912949	Chr14	121.514	121.514	121.636	7.67709	17.2234	Cis
17547837	Gm16867	predicted gene, 16867	100862085	Chr14	-	69.3643	69.3667	UNC24193650	Chr14	69.7282	68.7451	70.3516	7.43384	19.1946	Cis
17547846	Gm27177	predicted gene 27177	102636146	Chr14	-	69.5826	69.5849	UNC24193650	Chr14	69.7282	68.7013	70.3516	7.82664	17.6875	Cis
17309785	Selenop	selenoprotein P	20363	Chr15	+	3.26856	3.28035	UNC30787521	ChrX	45.9771	40.8325	47.6378	7.76329	8.07913	Trans
17309799	A630020A06	uncharacterized A630020A06	328489	Chr15	+	3.99741	4.01559	UNC24956990	Chr15	4.72939	3.26926	5.42828	7.70105	17.5697	Cis
17310044	Lifr	leukemia inhibitory factor receptor	16880	Chr15	+	7.12971	7.1944	UNC24984830	Chr15	7.08939	6.48291	8.13287	7.73276	14.9683	Cis
17310250	Capsl	calcyphosine-like	75568	Chr15	+	9.43611	9.46598	UNC25011651	Chr15	9.50547	8.55437	9.72876	7.63571	21.1583	Cis
17310282	Agxt2	alanine-glyoxylate aminotransferase 2	268782	Chr15	+	10.3586	10.41	UNC25040106	Chr15	11.5372	10.4116	12.1991	8.22052	11.8343	Cis
17310304	Rad1	RAD1 checkpoint DNA exonuclease	19355	Chr15	+	10.4861	10.4988	JAX00206306	Chr15	10.535	7.75346	11.5742	9.78695	10.5294	Cis
17310320	4930556M19Rik	RIKEN cDNA 4930556M19 gene	75259	Chr15	+	10.7149	10.7897	UNC25029102	Chr15	10.9036	10.6812	11.2837	7.57459	12.8431	Cis
17310339	C1qtnf3	C1q and tumor necrosis factor related protein 3	81799	Chr15	+	10.9524	10.98	UNC25039712	Chr15	11.5055	10.6812	12.1991	7.71333	14.8578	Cis
17310349	Amacr	alpha-methylacyl-CoA racemase	17117	Chr15	+	10.9818	10.9964	UNC25051855	Chr15	12.4317	7.65593	12.5342	8.38622	9.32759	Cis
17310637	Retreg1	reticulophagy regulator 1	66270	Chr15	+	25.8434	25.9732	UNC13703566	Chr7	117.896	116.732	118.145	7.69384	8.64578	Trans
17310652	Zfp622	zinc finger protein 622	52521	Chr15	+	25.9844	25.9983	UNC25225629	Chr15	26.054	22.8365	26.5944	7.83307	8.329	Cis
17310673	Ank	progressive ankylosis	11732	Chr15	+	27.4667	27.5947	UNC25251907	Chr15	27.7778	27.526	30.5136	7.82493	8.98852	Cis
17310688	Dnah5	dynein, axonemal, heavy chain 5	110082	Chr15	+	28.2039	28.4704	UNC25256185	Chr15	28.0526	27.9505	28.1144	7.968	42.5489	Cis
17310772	Ctnnd2	catenin (cadherin associated protein), delta 2	18163	Chr15	+	30.173	31.0289	UNC25284864	Chr15	30.1068	28.673	31.1529	7.80725	8.29289	Cis
17310808	Dap	death-associated protein	223453	Chr15	+	31.2245	31.274	UNC25299144	Chr15	30.8984	30.6309	30.8984	7.63245	33.0083	Cis
17310816	Cmbl	carboxymethylenebutenolidase-like (Pseudomonas)	69574	Chr15	+	31.5688	31.5901	JAX00397069	Chr15	31.4267	30.5427	32.4007	8.25747	14.5837	Cis
17310837	Sema5a	sema domain, seven thrombospondin repeats (type 1 and type 1-like), transmembrane domain (TM) and short cytoplasmic domain, (semaphorin) 5A	20356	Chr15	+	32.4173	32.6962	UNC25309104	Chr15	31.4803	31.2182	32.3243	7.74573	17.0382	Cis
17310872	Sdc2	syndecan 2	15529	Chr15	+	32.9209	33.0342	UNC25336187	Chr15	33.3497	32.5984	34.2712	7.68735	20.2693	Cis
17310912	Laptm4b	lysosomal-associated protein transmembrane 4B	114128	Chr15	+	34.238	34.2842	UNC25323624	Chr15	32.444	31.4267	34.7284	7.83568	10.301	Cis
17310944	Erich5	glutamate rich 5	239368	Chr15	+	34.4534	34.4737	UNC25399104	Chr15	38.3321	36.9471	38.9559	7.51889	8.20168	Trans
17311331	Trhr	thyrotropin releasing hormone receptor	22045	Chr15	+	44.1961	44.2358	UNC25478040	Chr15	44.2306	44.1613	45.5219	7.75994	17.4792	Cis
17311533	Deptor	DEP domain containing MTOR-interacting protein	97998	Chr15	+	55.1124	55.258	UNC25629027	Chr15	55.1208	54.5782	58.1139	7.7713	12.0301	Cis
17311551	Col14a1	collagen, type XIV, alpha 1	12818	Chr15	+	55.3079	55.5206	UNC25606290	Chr15	53.4208	51.6202	58.023	8.08697	8.14508	Cis
17311807	Sqle	squalene epoxidase	20775	Chr15	+	59.3152	59.331	UNC5404316	Chr3	64.2673	57.6574	66.1969	7.7187	9.30835	Trans
17311821	Nsmce2	NSE2/MMS21 homolog, SMC5-SMC6 complex SUMO ligase	68501	Chr15	+	59.3742	59.6015	UNC25694459	Chr15	59.8674	58.5754	59.9334	7.67277	11.5347	Cis
17311841	9930014A18Rik	RIKEN cDNA 9930014A18 gene	320469	Chr15	+	60.8232	60.8318	UNC25685221	Chr15	59.1028	58.8784	61.2079	7.58724	11.1371	Cis
17311846	Myc	myelocytomatosis oncogene	17869	Chr15	+	61.9855	61.9902	UNC4149656	Chr2	144.832	144.832	145.115	8.78	9.02724	Trans
17311968	Tg	thyroglobulin	21819	Chr15	+	66.6708	66.8507	UNC2751564	Chr2	24.9952	20.7022	26.3131	7.84523	7.84935	Trans
17312209	Ly6e	lymphocyte antigen 6 complex, locus E	17069	Chr15	+	74.9552	74.9598	UNC25863221	Chr15	72.2938	69.0251	75.6583	7.50628	13.0482	Trans
17312229	Ly6f	lymphocyte antigen 6 complex, locus F	17071	Chr15	+	75.2698	75.2722	JAX00207571	Chr15	75.4332	72.5187	75.5511	7.63248	8.49564	Cis
17312358	Smpd5	sphingomyelin phosphodiesterase 5	100503915	Chr15	+	76.2945	76.2968	JAX00149526	Chr7	26.8139	18.3225	28.1599	7.61149	8.31573	Trans
17312511	Adck5	aarF domain containing kinase 5	268822	Chr15	+	76.5764	76.5956	UNC25885369	Chr15	73.9732	72.8467	76.0672	7.77322	8.35244	Trans
17312567	Gpt	glutamic pyruvic transaminase, soluble	76282	Chr15	+	76.6968	76.6995	UNC060199954	Chr6	127.703	126.725	133.108	7.93169	8.23949	Trans
17312882	H1f0	H1 histone family, member 0	14958	Chr15	+	79.0283	79.0305	UNC25949424	Chr15	79.5181	78.7438	80.0005	7.80479	8.99876	Cis
17312905	Eif3l	eukaryotic translation initiation factor 3, subunit L	223691	Chr15	+	79.0752	79.0944	backupUNC150393474	Chr15	79.3966	78.7438	79.6908	7.86026	18.1628	Cis
17313050	Apobec3	apolipoprotein B mRNA editing enzyme, catalytic polypeptide 3	80287	Chr15	+	79.8924	79.9082	UNC25932238	Chr15	78.2292	76.9183	80.0005	8.32468	9.90587	Cis
17313495	Ccdc134	coiled-coil domain containing 134	76457	Chr15	+	82.128	82.1422	UNC25941426	Chr15	78.9328	78.7024	80.0005	7.7691	18.4944	Trans
17313599	Cyp2d12	cytochrome P450, family 2, subfamily d, polypeptide 12	380997	Chr15	+	82.5553	82.5594	UNC26001793	Chr15	84.0847	82.7414	84.1629	7.79109	10.1246	Cis
17313647	Bik	BCL2-interacting killer	12124	Chr15	+	83.5269	83.5446	UNC26003852	Chr15	84.2013	83.1304	84.4903	7.86508	10.0622	Cis
17313739	Prr5	proline rich 5 (renal)	109270	Chr15	+	84.681	84.7036	UNC26008115	Chr15	84.4903	83.1038	86.0098	7.81108	8.12259	Cis
17313779	Upk3a	uroplakin 3A	22270	Chr15	+	85.0172	85.0226	UNC25624794	Chr15	54.781	54.781	55.0068	9.85006	11.1217	Trans
17314373	Muc19	mucin 19	239611	Chr15	+	91.9062	91.9064	UNC26098162	Chr15	91.0599	90.5373	91.9698	7.827	8.7549	Cis
17314629	4930415O20Rik	RIKEN cDNA 4930415O20 gene	73863	Chr15	+	98.571	98.5895	UNC26200084	Chr15	98.5159	97.6531	98.5692	7.98823	8.37333	Cis
17314636	Cacnb3	calcium channel, voltage-dependent, beta 3 subunit	12297	Chr15	+	98.6322	98.6442	UNC26201079	Chr15	98.6264	98.5912	99.0297	7.44649	11.9857	Cis
17314729	Dnajc22	DnaJ heat shock protein family (Hsp40) member C22	72778	Chr15	+	99.0932	99.1047	UNC26208809	Chr15	99.4607	99.1091	99.7515	7.70072	10.534	Cis
17314833	Aqp2	aquaporin 2	11827	Chr15	+	99.5791	99.5845	UNC5266164	Chr3	52.4933	50.7625	52.4933	7.65378	8.77548	Trans
17314987	Tmprss12	transmembrane (C-terminal) protease, serine 12	75002	Chr15	+	100.281	100.293	UNC26218035	Chr15	100.392	99.8927	100.45	7.77829	10.9734	Cis
17315012	Higd1c	HIG1 domain family, member 1C	380975	Chr15	+	100.361	100.384	UNC150277167	Chr15	100.269	100.043	100.327	7.83703	14.3689	Cis
17315023	Gm5475	predicted gene 5475	432982	Chr15	+	100.422	100.428	UNC26216066	Chr15	100.167	99.8927	100.45	7.85421	10.6206	Cis
17315240	Gm5477	type II keratin Kb16P	432986	Chr15	+	101.609	101.61	UNC25621982	Chr15	54.5782	54.5782	54.7612	7.91627	10.9689	Trans
17315245	Krt18	keratin 18	16668	Chr15	+	102.028	102.032	UNC26228561	Chr15	101.698	101.418	102.19	7.75177	13.3068	Cis
17315463	Map3k12	mitogen-activated protein kinase kinase kinase 12	26404	Chr15	+	102.504	102.504	UNC6045859	Chr3	117.342	117.178	117.995	7.65339	8.04664	Trans
17315490	Hoxc12	homeobox C12	15421	Chr15	+	102.937	102.939	UNC4172984	Chr2	146.936	146.897	147.036	8.14635	8.53214	Trans
17315558	Copz1	coatomer protein complex, subunit zeta 1	56447	Chr15	+	103.289	103.3	UNC26247077	Chr15	103.554	103.215	103.654	7.88059	8.51457	Cis
17315763	Egflam	EGF-like, fibronectin type III and laminin G domains	268780	Chr15	-	7.20745	7.39811	UNC30710710	ChrX	19.4749	12.4904	23.9937	8.67553	8.75951	Trans
17315946	Dnajc21	DnaJ heat shock protein family (Hsp40) member C21	78244	Chr15	-	10.4468	10.4704	JAX00058884	Chr15	10.4263	10.0029	13.0677	7.86867	14.3519	Cis
17316148	C030047K22Rik	RIKEN cDNA C030047K22 gene	77618	Chr15	-	18.6979	18.8188	backupUNC050128178	Chr5	81.6036	80.8181	88.3974	7.60187	7.78411	Trans
17316345	Snhg18	small nucleolar RNA host gene 18	100616095	Chr15	-	32.2406	32.2446	UNC25321653	Chr15	32.33	31.6887	33.3497	7.6359	9.77711	Cis
17316402	Nipal2	NIPA-like domain containing 2	223473	Chr15	-	34.5744	34.6786	JAX00397749	Chr15	34.5713	34.3654	34.6681	7.0445	23.4405	Cis
17316402	Nipal2	NIPA-like domain containing 2	223473	Chr15	-	34.5744	34.6786	UNC9920663	Chr5	112.051	111.439	112.051	7.0445	8.32253	Trans
17316415	Stk3	serine/threonine kinase 3	56274	Chr15	-	34.8756	35.1557	UNC25352596	Chr15	34.7284	34.3654	35.3093	8.1187	12.9944	Cis
17316443	Rgs22	regulator of G-protein signalling 22	626596	Chr15	-	36.0096	36.1223	UNC21559805	Chr12	87.1461	87.0616	88.4335	7.77989	8.10106	Trans
17316739	Dpys	dihydropyrimidinase	64705	Chr15	-	39.7688	39.8574	backupUNC150136886	Chr15	38.7098	38.3321	44.1669	7.60344	11.8902	Cis
17316986	Eif3h	eukaryotic translation initiation factor 3, subunit H	68135	Chr15	-	51.7866	51.8655	UNC25612351	Chr15	53.8629	51.6694	54.4568	9.32969	11.3949	Trans
17317015	Ext1	exostoses (multiple) 1	14042	Chr15	-	53.0658	53.3459	UNC25608819	Chr15	53.6038	51.7838	58.2521	7.82891	9.78306	Cis
17317031	Samd12	sterile alpha motif domain containing 12	320679	Chr15	-	53.4617	53.9025	UNC25621982	Chr15	54.5782	52.3354	54.9043	7.88994	18.6562	Cis
17317144	Mrpl13	mitochondrial ribosomal protein L13	68537	Chr15	-	55.5341	55.5576	UNC25641288	Chr15	55.8828	55.1208	58.1382	7.82079	15.1605	Cis
17317175	Slc22a22	solute carrier family 22 (organic cation transporter), member 22	210463	Chr15	-	57.2439	57.4776	UNC25643992	Chr15	56.0989	56.0385	57.8355	11.5043	18.7331	Cis
17317214	9130401M01Rik	RIKEN cDNA 9130401M01 gene	75758	Chr15	-	58.0223	58.0342	UNC25663241	Chr15	57.6119	55.1208	58.1382	7.93492	15.3109	Cis
17317284	Anxa13	annexin A13	69787	Chr15	-	58.3415	58.3893	UNC25672211	Chr15	58.2521	58.2146	58.5841	7.49316	22.4637	Cis
17317428	Gsdmc	gasdermin C	83492	Chr15	-	63.776	63.8087	UNC8365034	Chr4	140.892	140.736	141.521	8.0794	8.88589	Trans
17317500	Asap1	ArfGAP with SH3 domain, ankyrin repeat and PH domain1	13196	Chr15	-	64.0894	64.3828	UNC25797124	Chr15	67.8913	63.2601	67.9904	7.71823	8.63016	Trans
17317837	Ago2	argonaute RISC catalytic subunit 2	239528	Chr15	-	73.104	73.1849	UNC17263617	Chr9	120.407	119.606	120.664	7.73204	7.83024	Trans
17318083	Ly6a	lymphocyte antigen 6 complex, locus A	110454	Chr15	-	74.9949	74.9955	UNC25900408	Chr15	75.2153	72.3131	75.4332	7.62997	21.3157	Cis
17318143	Top1mt	DNA topoisomerase 1, mitochondrial	72960	Chr15	-	75.657	75.6787	UNC25909242	Chr15	75.9612	75.6583	76.1695	7.68615	10.7888	Cis
17318210	Eef1d	eukaryotic translation elongation factor 1 delta (guanine nucleotide exchange protein)	66656	Chr15	-	75.8949	75.9096	UNC23394824	Chr13	112.541	112.353	114.594	7.84614	7.8913	Trans
17318750	Rbfox2	RNA binding protein, fox-1 homolog (C. elegans) 2	93686	Chr15	-	77.0817	77.307	backupUNC120041379	Chr12	24.6398	21.5993	25.836	7.64387	9.33792	Trans
17318807	Apol10b	apolipoprotein L 10B	328561	Chr15	-	77.5842	77.5961	JAX00406468	Chr15	78.0656	76.0672	78.3151	7.86908	8.38431	Cis
17318907	Eif3d	eukaryotic translation initiation factor 3, subunit D	55944	Chr15	-	77.9597	77.9708	UNC25932238	Chr15	78.2292	77.3157	78.3988	7.66315	12.8396	Cis
17318923	Cacng2	calcium channel, voltage-dependent, gamma subunit 2	12300	Chr15	-	77.9922	78.12	JAX00242455	Chr1	13.7826	12.8805	25.3736	7.78457	8.7547	Trans
17318932	Ift27	intraflagellar transport 27	67042	Chr15	-	78.1595	78.1741	UNC25930440	Chr15	78.103	77.8806	78.2798	7.70578	15.6571	Cis
17318942	Pvalb	parvalbumin	19293	Chr15	-	78.1913	78.2064	JAX00406581	Chr15	78.5138	78.3988	78.5326	8.07132	16.405	Cis
17319063	Card10	caspase recruitment domain family, member 10	105844	Chr15	-	78.7752	78.8025	UNC25932238	Chr15	78.2292	78.2287	79.3966	7.76849	14.6523	Cis
17319106	Gm17753	predicted gene, 17753	654469	Chr15	-	79.0164	79.0259	UNC25949424	Chr15	79.5181	76.1221	80.0005	7.94272	14.2264	Cis
17319150	Baiap2l2	BAI1-associated protein 2-like 2	207495	Chr15	-	79.2583	79.2855	UNC25937585	Chr15	78.6403	78.2798	79.1598	7.70058	12.8144	Cis
17319168	Pla2g6	phospholipase A2, group VI	53357	Chr15	-	79.2866	79.3284	backupUNC150393474	Chr15	79.3966	78.9964	81.2406	8.04616	9.37433	Cis
17319289	Josd1	Josephin domain containing 1	74158	Chr15	-	79.6745	79.6874	UNC25937585	Chr15	78.6403	78.3988	79.8612	7.76614	14.3728	Cis
17319366	Cbx7	chromobox 7	52609	Chr15	-	79.9169	79.9711	JAX00406937	Chr15	80.0005	79.369	81.2406	7.52664	7.88644	Cis
17319403	Rpl3	ribosomal protein L3	27367	Chr15	-	80.0803	80.0803	UNC25952515	Chr15	79.8109	79.5968	80.9571	7.69539	15.9849	Cis
17319453	Slc25a17	solute carrier family 25 (mitochondrial carrier, peroxisomal membrane protein), member 17	20524	Chr15	-	81.319	81.3608	UNC25975145	Chr15	81.601	78.103	82.0218	10.4855	11.1755	Cis
17319565	Desi1	desumoylating isopeptidase 1	28075	Chr15	-	81.9931	82.0338	UNC25981640	Chr15	82.1793	79.5181	82.6042	7.74076	14.5521	Cis
17319596	Cenpm	centromere protein M	66570	Chr15	-	82.2339	82.2447	JAX00406422	Chr15	77.8159	77.3526	86.8661	7.78954	9.18717	Trans
17319619	Ndufa6	NADH dehydrogenase (ubiquinone) 1 alpha subcomplex, 6 (B14)	67130	Chr15	-	82.3501	82.3542	JAX00407384	Chr15	82.4051	81.6609	83.0061	7.77535	13.1692	Cis
17319625	Cyp2d22	cytochrome P450, family 2, subfamily d, polypeptide 22	56448	Chr15	-	82.371	82.3802	UNC25983757	Chr15	82.3758	82.302	82.3758	7.92011	15.364	Cis
17319707	Cyp2d26	cytochrome P450, family 2, subfamily d, polypeptide 26	76279	Chr15	-	82.7901	82.7942	JAX00407384	Chr15	82.4051	82.4051	83.4954	7.70584	15.6259	Cis
17319707	Cyp2d26	cytochrome P450, family 2, subfamily d, polypeptide 26	76279	Chr15	-	82.7901	82.7942	UNC11986058	Chr6	121.662	93.0354	122.581	7.70584	8.19932	Trans
17319770	Poldip3	polymerase (DNA-directed), delta interacting protein 3	73826	Chr15	-	83.1265	83.1494	JAX00407505	Chr15	83.0522	82.2334	84.0495	7.79567	13.2738	Cis
17320090	Cdpf1	cysteine rich, DPF motif domain containing 1	72355	Chr15	-	85.807	85.8117	UNC26025473	Chr15	85.8311	85.4984	86.8475	7.95173	10.8146	Cis
17320240	1810021B22Rik	RIKEN cDNA 1810021B22 gene	69120	Chr15	-	89.0712	89.0758	UNC26073946	Chr15	89.4506	88.831	90.7257	8.28613	11.1491	Cis
17320556	Rabl2	RAB, member RAS oncogene family-like 2	68708	Chr15	-	89.5827	89.5919	backupUNC150249559	Chr15	89.5658	89.3018	90.0267	7.61425	8.97605	Cis
17320614	Kif21a	kinesin family member 21A	16564	Chr15	-	90.9344	91.0498	UNC26094441	Chr15	90.8589	90.5373	91.3244	7.89462	14.4418	Cis
17320666	Slc2a13	solute carrier family 2 (facilitated glucose transporter), member 13	239606	Chr15	-	91.2687	91.5732	UNC26123915	Chr15	92.5692	90.0267	93.3279	7.71881	9.2167	Cis
17320813	Nell2	NEL-like 2	54003	Chr15	-	95.0754	95.5287	UNC26161152	Chr15	95.4868	94.9332	95.571	7.7287	27.1859	Cis
17320854	LOC102634389	uncharacterized LOC102634389	102634389	Chr15	-	95.8245	95.83	UNC26167715	Chr15	95.9437	94.5277	96.1371	7.7267	10.3344	Cis
17320947	Slc38a4	solute carrier family 38, member 4	69354	Chr15	-	96.995	97.056	UNC26185136	Chr15	97.405	96.6003	97.4395	7.55373	17.4442	Cis
17320967	Amigo2	adhesion molecule with Ig like domain 2	105827	Chr15	-	97.2441	97.2472	UNC26180422	Chr15	97.0852	96.2656	97.4395	7.91189	12.8687	Cis
17320993	Endou	endonuclease, polyU-specific	19011	Chr15	-	97.7112	97.7313	UNC26191501	Chr15	97.8567	97.7268	98.5447	7.88928	17.4305	Cis
17321307	Rnd1	Rho family GTPase 1	223881	Chr15	-	98.6635	98.6774	UNC26200769	Chr15	98.5912	98.1188	98.9675	7.72687	8.36834	Cis
17321318	Fkbp11	FK506 binding protein 11	66120	Chr15	-	98.7245	98.7282	UNC150273870	Chr15	98.7504	98.7306	99.0297	7.57739	21.892	Cis
17321722	Tfcp2	transcription factor CP2	21422	Chr15	-	100.503	100.552	UNC26608238	Chr16	33.0841	23.3138	33.2654	8.09628	8.24275	Trans
17321918	Gm5476	type II keratin Kb17P pseudogene	432985	Chr15	-	101.587	101.589	UNC18139372	Chr10	67.0732	66.7335	67.3448	7.86641	8.18929	Trans
17322113	Krt8	keratin 8	16691	Chr15	-	101.997	102.004	UNC26236500	Chr15	102.266	101.932	102.443	7.61378	18.101	Cis
17322418	BC048502	cDNA sequence BC048502	223927	Chr15	-	103.439	103.448	UNC15506442	Chr8	112.064	110.454	112.194	8.04579	8.29519	Trans
17322429	Ppp1r1a	protein phosphatase 1, regulatory (inhibitor) subunit 1A	58200	Chr15	-	103.53	103.538	UNC26243825	Chr15	103.107	102.541	103.654	8.17068	13.1345	Cis
17547877	Deptor	DEP domain containing MTOR-interacting protein	97998	Chr15	+	55.2559	55.2591	UNC25629398	Chr15	55.1436	54.5603	57.599	8.21179	18.3973	Cis
17322559	Hmox2	heme oxygenase 2	15369	Chr16	+	4.7264	4.76653	JAX00412603	Chr16	4.44011	3.73382	5.93219	7.70931	17.4617	Cis
17322682	Alg1	asparagine-linked glycosylation 1 (beta-1,4-mannosyltransferase)	208211	Chr16	+	5.2338	5.24487	JAX00412544	Chr16	4.1396	3.752	6.85535	10.1899	12.0286	Cis
17322950	Snx29	sorting nexin 29	74478	Chr16	+	11.3677	11.7553	UNC26346172	Chr16	11.8751	10.8582	12.1251	10.7692	14.329	Cis
17323110	2900011O08Rik	RIKEN cDNA 2900011O08 gene	67254	Chr16	+	13.9866	14.1005	UNC26371420	Chr16	13.9552	13.7248	20.7892	7.6223	16.1123	Cis
17323302	Pkp2	plakophilin 2	67451	Chr16	+	16.2134	16.2726	UNC26403805	Chr16	17.1112	13.1255	17.5849	8.13647	10.0346	Cis
17323302	Pkp2	plakophilin 2	67451	Chr16	+	16.2134	16.2726	UNC27795757	Chr17	33.6125	31.8037	34.536	8.13647	9.53517	Trans
17323332	Top3b	topoisomerase (DNA) III beta	21976	Chr16	+	16.8707	16.8929	JAX00414927	Chr16	17.2656	15.9553	17.266	7.82663	12.5414	Cis
17323427	Rimbp3	RIMS binding protein 3	239731	Chr16	+	17.2082	17.2139	UNC23149996	Chr13	96.095	89.2809	98.4941	8.03996	8.32196	Trans
17323479	Aifm3	apoptosis-inducing factor, mitochondrion-associated 3	72168	Chr16	+	17.4897	17.5073	UNC26404746	Chr16	17.266	15.8936	22.1316	8.0466	9.59941	Cis
17323632	Dgcr6	DiGeorge syndrome critical region gene 6	13353	Chr16	+	18.0529	18.0715	JAX00082899	Chr18	45.084	43.8535	46.0613	7.79228	7.98268	Trans
17323736	Gnb1l	guanine nucleotide binding protein (G protein), beta polypeptide 1-like	13972	Chr16	+	18.4989	18.566	UNC26403093	Chr16	17.0338	13.1255	23.7281	7.92229	8.03026	Cis
17324344	Hrg	histidine-rich glycoprotein	94175	Chr16	+	22.9511	22.9615	UNC26469272	Chr16	22.8196	22.8196	23.0144	7.78102	41.4772	Cis
17324344	Hrg	histidine-rich glycoprotein	94175	Chr16	+	22.9511	22.9615	JAX00089607	Chr19	47.6373	46.6561	47.7759	7.78102	8.90044	Trans
17324356	Kng1	kininogen 1	16644	Chr16	+	23.0579	23.0821	UNC26475659	Chr16	23.3138	22.7393	24.6091	8.31138	17.2804	Cis
17324513	Cldn16	claudin 16	114141	Chr16	+	26.4632	26.4827	UNC4014466	Chr2	134.174	131.983	134.932	7.66546	8.06958	Trans
17324553	Ccdc50	coiled-coil domain containing 50	67501	Chr16	+	27.3889	27.4503	UNC26541125	Chr16	27.9287	25.8768	28.188	8.54347	11.7069	Cis
17324576	Hrasls	HRAS-like suppressor	27281	Chr16	+	29.2097	29.2297	UNC26565530	Chr16	29.5017	24.4018	29.6844	7.95268	9.18676	Cis
17324733	Cep19	centrosomal protein 19	66994	Chr16	+	32.0998	32.1079	JAX00314529	Chr11	68.8559	48.6039	70.3568	7.7056	7.967	Trans
17324794	Tctex1d2	Tctex1 domain containing 2	66061	Chr16	+	32.4197	32.429	UNC26593370	Chr16	31.6065	30.9816	32.5011	8.03336	15.5593	Cis
17325109	Itgb5	integrin beta 5	16419	Chr16	+	33.83	33.9491	UNC26619227	Chr16	33.8807	33.3497	34.8184	8.67566	13.4665	Cis
17325274	Parp9	poly (ADP-ribose) polymerase family, member 9	80285	Chr16	+	35.9388	35.9724	UNC23184134	Chr13	98.2545	97.8457	98.3164	8.72971	9.15889	Trans
17325454	Polq	polymerase (DNA directed), theta	77782	Chr16	+	37.0118	37.0952	UNC15602782	Chr8	118.344	117.987	118.66	7.74546	8.14773	Trans
17325637	B4galt4	UDP-Gal:betaGlcNAc beta 1,4-galactosyltransferase, polypeptide 4	56375	Chr16	+	38.752	38.7686	UNC26672582	Chr16	38.8549	38.4171	38.9856	7.60328	17.262	Cis
17325787	Spice1	spindle and centriole associated protein 1	212514	Chr16	+	44.3472	44.3874	UNC26727889	Chr16	44.4601	43.6299	45.6938	8.25123	8.76224	Cis
17325810	Cfap44	cilia and flagella associated protein 44	212517	Chr16	+	44.3948	44.4821	UNC160214075	Chr16	44.6407	42.2967	44.7801	7.94463	11.7049	Cis
17326105	Myh15	myosin, heavy chain 15	667772	Chr16	+	49.0575	49.1989	UNC10118777	Chr5	127.178	126.972	127.178	8.34264	12.3581	Trans
17326147	Ift57	intraflagellar transport 57	73916	Chr16	+	49.6994	49.7646	UNC26777495	Chr16	48.2972	45.5196	49.9656	8.15163	11.1025	Cis
17326405	Dcbld2	discoidin, CUB and LCCL domain containing 2	73379	Chr16	+	58.4085	58.4672	UNC26906815	Chr16	58.4144	58.1111	58.5622	7.86455	30.0465	Cis
17326428	Cpox	coproporphyrinogen oxidase	12892	Chr16	+	58.6702	58.6792	UNC26945289	Chr16	61.4223	58.6283	66.906	7.87613	11.7149	Trans
17326428	Cpox	coproporphyrinogen oxidase	12892	Chr16	+	58.6702	58.6792	UNC23376954	Chr13	111.55	109.974	111.964	7.87613	8.28347	Trans
17326567	Gbe1	glucan (1,4-alpha-), branching enzyme 1	74185	Chr16	+	70.314	70.5696	UNC27031203	Chr16	67.7805	67.1937	68.6847	7.64935	13.6118	Trans
17326756	Ncam2	neural cell adhesion molecule 2	17968	Chr16	+	81.2009	81.624	UNC27226263	Chr16	80.8547	78.5978	84.2486	7.77444	13.9493	Cis
17326846	N6amt1	N-6 adenine-specific DNA methyltransferase 1 (putative)	67768	Chr16	+	87.3542	87.3687	UNC27309172	Chr16	86.1788	85.8962	88.1496	7.85503	9.80674	Cis
17326883	B130034C11Rik	RIKEN cDNA B130034C11 gene	414095	Chr16	+	87.4961	87.504	UNC27319626	Chr16	86.9838	86.9599	89.144	8.05916	8.79852	Cis
17326887	Map3k7cl	Map3k7 C-terminal like	224419	Chr16	+	87.5535	87.5952	UNC27319626	Chr16	86.9838	86.9599	89.2933	7.961	14.7547	Cis
17326887	Map3k7cl	Map3k7 C-terminal like	224419	Chr16	+	87.5535	87.5952	UNC13657317	Chr7	114.311	111.792	114.555	7.961	7.99795	Trans
17326956	Sod1	superoxide dismutase 1, soluble	20655	Chr16	+	90.2208	90.2263	UNC27373206	Chr16	90.3197	89.5176	90.5289	7.79874	25.4566	Cis
17327038	Ifnar2	interferon (alpha and beta) receptor 2	15976	Chr16	+	91.373	91.4053	UNC27390675	Chr16	91.4854	91.173	91.4977	8.41693	10.4752	Cis
17327054	Il10rb	interleukin 10 receptor, beta	16155	Chr16	+	91.4062	91.4258	UNC160241366	Chr16	91.2443	91.014	91.6238	7.82123	8.33329	Cis
17327066	A930006K02Rik	RIKEN cDNA A930006K02 gene	100503120	Chr16	+	91.4651	91.4701	UNC27388493	Chr16	91.3109	91.1365	95.9763	7.73832	8.22586	Cis
17327264	Cbr3	carbonyl reductase 3	109857	Chr16	+	93.6832	93.6909	UNC19816001	Chr11	65.8054	65.5862	68.6468	7.60981	9.25303	Trans
17327270	Dopey2	dopey family member 2	70028	Chr16	+	93.712	93.8104	UNC27425389	Chr16	93.7122	93.7122	94.1867	8.24861	16.6048	Cis
17327371	Ttc3	tetratricopeptide repeat domain 3	22129	Chr16	+	94.3707	94.4669	UNC27433512	Chr16	94.2435	94.1867	95.3265	7.71794	9.52819	Cis
17327544	Bace2	beta-site APP-cleaving enzyme 2	56175	Chr16	+	97.3542	97.4376	UNC27474002	Chr16	97.246	96.8885	98.0961	7.84412	20.5646	Cis
17327557	Mx2	MX dynamin-like GTPase 2	17858	Chr16	+	97.5387	97.5608	UNC27471058	Chr16	96.9787	94.6951	98.0961	8.30628	9.79931	Cis
17327613	Nlrc3	NLR family, CARD domain containing 3	268857	Chr16	-	3.94726	3.97657	backupUNC160361454	Chr16	3.51141	3.16841	4.02109	7.7322	9.40427	Cis
17327660	Trap1	TNF receptor-associated protein 1	68015	Chr16	-	4.04004	4.0778	backupUNC160361454	Chr16	3.51141	3.16841	6.09387	8.23408	8.32014	Cis
17327737	Srl	sarcalumenin	106393	Chr16	-	4.48125	4.54178	UNC26350444	Chr16	12.1928	4.1396	14.1515	7.65645	12.4207	Trans
17327757	Pam16	presequence translocase-asssociated motor 16 homolog (S. cerevisiae)	66449	Chr16	-	4.61647	4.62499	JAX00288270	Chr10	43.6509	43.6141	44.7205	7.60765	12.476	Trans
17327802	Nmral1	NmrA-like family domain containing 1	67824	Chr16	-	4.71096	4.71925	UNC160190732	Chr16	4.52053	4.02109	6.74936	7.72172	8.04071	Cis
17327837	Gm16861	predicted gene, 16861	100503704	Chr16	-	4.93507	4.93958	UNC26259463	Chr16	5.11949	3.73382	6.08896	7.73434	7.84812	Cis
17327862	2020-09-12	septin 12	71089	Chr16	-	4.98718	4.99783	UNC911464	Chr1	72.0288	69.1148	73.6634	8.39043	9.05645	Trans
17327950	AU021092	expressed sequence AU021092	239691	Chr16	-	5.21183	5.22228	JAX00412943	Chr16	6.50084	3.16841	8.20781	8.16436	11.3358	Cis
17327961	Eef2kmt	eukaryotic elongation factor 2 lysine methyltransferase	70511	Chr16	-	5.24446	5.25591	UNC26277751	Chr16	6.43206	3.87863	11.8915	7.78987	9.60201	Cis
17328288	Pdxdc1	pyridoxal-dependent decarboxylase domain containing 1	94184	Chr16	-	13.8338	13.9031	UNC26370043	Chr16	13.7969	13.1483	13.9159	9.11471	20.4701	Cis
17328326	Ifitm7	interferon induced transmembrane protein 7	74482	Chr16	-	13.9829	13.9868	UNC26371420	Chr16	13.9552	13.7461	20.7892	7.69145	16.0745	Cis
17328411	Fopnl	Fgfr1op N-terminal like	66086	Chr16	-	14.2997	14.3174	UNC26381248	Chr16	14.941	14.0711	20.4107	7.85467	8.30175	Cis
17328451	Mzt2	mitotic spindle organizing protein 2	72083	Chr16	-	15.8485	15.8634	UNC26378561	Chr16	14.6106	14.3539	15.7171	8.28268	8.51094	Cis
17328621	Mir130b	microRNA 130b	723816	Chr16	-	17.1241	17.1241	backupUNC140686121	Chr14	9.1723	8.69322	11.2318	7.78934	16.6443	Trans
17328621	Mir130b	microRNA 130b	723816	Chr16	-	17.1241	17.1241	UNC19190246	Chr11	18.5781	10.469	18.8992	7.78934	8.49559	Trans
17328829	Slc25a1	solute carrier family 25 (mitochondrial carrier, citrate transporter), member 1	13358	Chr16	-	17.9253	17.9282	UNC26462182	Chr16	22.319	17.4398	36.0748	7.65303	7.77819	Trans
17328937	Comt	catechol-O-methyltransferase	12846	Chr16	-	18.4079	18.4268	UNC26410099	Chr16	17.8382	17.5849	21.4926	7.85471	9.0886	Cis
17329236	Tmem41a	transmembrane protein 41a	66664	Chr16	-	21.9345	21.9475	UNC26408616	Chr16	17.6537	13.0452	22.319	7.66722	10.0299	Trans
17329350	Tbccd1	TBCC domain containing 1	70573	Chr16	-	22.8137	22.8575	UNC26474989	Chr16	23.2674	22.8196	23.7615	8.98136	11.5401	Cis
17329361	Kng2	kininogen 2	385643	Chr16	-	22.9873	23.0291	UNC26472626	Chr16	23.0626	22.8196	23.2674	8.08254	15.1354	Cis
17329454	P3h2	prolyl 3-hydroxylase 2	210530	Chr16	-	25.9594	26.1058	UNC23178239	Chr13	97.9016	97.7924	98.3164	8.43465	8.66898	Trans
17329494	Gm20319	predicted gene, 20319	100504628	Chr16	-	26.7145	26.7333	JAX00416243	Chr16	26.8035	26.0487	27.4919	8.28879	16.9817	Cis
17329500	Gmnc	geminin coiled-coil domain containing	239789	Chr16	-	26.9602	26.99	UNC070678404	Chr7	96.0379	92.7857	98.5216	8.65882	9.16399	Trans
17329508	Uts2b	urotensin 2B	224065	Chr16	-	27.3534	27.3702	UNC26509230	Chr16	25.8768	25.8768	28.3868	8.28266	16.9699	Cis
17329568	Atp13a4	ATPase type 13A4	224079	Chr16	-	29.3962	29.5448	UNC26588771	Chr16	31.1518	5.78645	33.0841	7.33712	7.47023	Cis
17329568	Atp13a4	ATPase type 13A4	224079	Chr16	-	29.3962	29.5448	JAX00412308	Chr15	102.701	99.8704	102.804	7.33712	8.76916	Trans
17329692	Lsg1	large 60S subunit nuclear export GTPase 1	224092	Chr16	-	30.5606	30.5876	JAX00208777	Chr16	30.8195	30.2579	31.4506	7.93242	8.85607	Cis
17329864	Muc20	mucin 20	224116	Chr16	-	32.7781	32.7973	UNC26565655	Chr16	29.508	27.6784	32.9848	7.78273	7.98048	Trans
17330039	LOC105246106	uncharacterized LOC105246106	105246106	Chr16	-	34.9994	35.0046	CEAJAX00014673	Chr10	8.05757	5.69466	9.08454	7.74292	8.50655	Trans
17330130	Gm15564	predicted gene 15564	102639045	Chr16	-	35.9668	35.9832	UNC6533211	Chr3	150.76	150.541	150.871	7.94297	9.69887	Trans
17330175	Stfa2	stefin A2	20862	Chr16	-	36.4083	36.4084	JAX00098064	Chr2	103.376	100.439	103.594	8.08912	8.43139	Trans
17330264	Fbxo40	F-box protein 40	207215	Chr16	-	36.9638	36.9904	UNC26652099	Chr16	36.6624	36.6366	38.2771	7.79405	9.79472	Cis
17330463	Gm19522	predicted gene, 19522	100503040	Chr16	-	42.8852	42.9121	UNC26717171	Chr16	43.4423	42.2967	43.6887	8.39465	10.0082	Cis
17330486	Qtrt2	queuine tRNA-ribosyltransferase accessory subunit 2	106248	Chr16	-	43.8626	43.8897	UNC26722941	Chr16	44.0809	43.6299	44.5435	9.9735	12.498	Cis
17330506	Gramd1c	GRAM domain containing 1C	207798	Chr16	-	43.9808	44.0279	UNC19768095	Chr11	62.7701	61.9527	63.0158	7.84531	8.38919	Trans
17330506	Gramd1c	GRAM domain containing 1C	207798	Chr16	-	43.9808	44.0279	JAX00336586	Chr12	68.3727	67.6841	69.7887	7.84531	8.06866	Trans
17330577	Boc	biregional cell adhesion molecule-related/down-regulated by oncogenes (Cdon) binding protein	117606	Chr16	-	44.4853	44.5588	JAX00420629	Chr16	50.7499	36.9472	50.9758	7.64412	8.41541	Trans
17330614	Slc35a5	solute carrier family 35, member A5	74102	Chr16	-	45.1402	45.1586	UNC26744420	Chr16	45.6524	45.0705	45.7734	7.75446	25.5739	Cis
17330805	Trat1	T cell receptor associated transmembrane adaptor 1	77647	Chr16	-	48.7323	48.7721	UNC4168030	Chr2	146.533	146.533	146.533	9.97828	11.0078	Trans
17330905	Dubr	Dppa2 upstream binding RNA	68190	Chr16	-	50.7195	50.7327	UNC26808995	Chr16	50.7372	50.2641	56.109	7.85024	10.6473	Cis
17331114	Tbc1d23	TBC1 domain family, member 23	67581	Chr16	-	57.1694	57.2314	UNC26894674	Chr16	57.2356	56.2948	57.6867	8.28417	12.5106	Cis
17331173	St3gal6	ST3 beta-galactoside alpha-2,3-sialyltransferase 6	54613	Chr16	-	58.4687	58.5242	JAX00069927	Chr16	57.5276	56.2948	58.5622	7.56732	16.4815	Cis
17331326	Epha6	Eph receptor A6	13840	Chr16	-	59.6536	60.6053	JAX00422678	Chr16	60.5608	59.697	66.8669	7.63598	12.1467	Cis
17331350	Nsun3	NOL1/NOP2/Sun domain family member 3	106338	Chr16	-	62.7349	62.7868	UNC27018695	Chr16	66.906	61.6159	66.9086	7.81395	14.8202	Trans
17331481	Robo2	roundabout guidance receptor 2	268902	Chr16	-	73.8939	74.4111	UNC27116573	Chr16	73.853	73.6897	76.4541	7.64644	8.92909	Cis
17331669	App	amyloid beta (A4) precursor protein	11820	Chr16	-	84.9552	85.1736	UNC27293758	Chr16	85.2522	80.0163	88.6399	8.01374	9.39126	Cis
17331832	Krtap24-1	keratin associated protein 24-1	239932	Chr16	-	88.6108	88.6123	backupUNC060168022	Chr6	107.709	107.48	115.273	7.8655	8.97979	Trans
17331886	Krtap16-3	keratin associated protein 16-3	71369	Chr16	-	88.9623	88.9628	UNC4181832	Chr2	147.62	147.62	147.62	9.59797	10.7594	Trans
17332133	Dnajc28	DnaJ heat shock protein family (Hsp40) member C28	246738	Chr16	-	91.6144	91.619	UNC27381153	Chr16	90.7831	89.1741	92.1594	8.23532	9.28552	Cis
17332223	Kcne1	potassium voltage-gated channel, Isk-related subfamily, member 1	16509	Chr16	-	92.3463	92.3594	UNC27406350	Chr16	92.5261	92.1493	93.6435	7.84548	9.00792	Cis
17332290	Cldn14	claudin 14	56173	Chr16	-	93.9191	94.0088	UNC1988421	Chr1	154.555	95.1863	155.654	7.90463	7.94209	Trans
17332317	Pigp	phosphatidylinositol glycan anchor biosynthesis, class P	56176	Chr16	-	94.3589	94.371	UNC27442277	Chr16	94.9011	93.9164	94.9011	7.82804	15.6016	Cis
17332457	Lca5l	Leber congenital amaurosis 5-like	385668	Chr16	-	96.1586	96.1922	UNC18720435	Chr10	111.45	100.162	112.754	7.75826	8.15914	Trans
17332568	Tmprss2	transmembrane protease, serine 2	50528	Chr16	-	97.5671	97.6112	UNC27482059	Chr16	98.0961	96.9634	98.0961	7.68448	14.5234	Cis
17547947	Tm4sf19	transmembrane 4 L six family member 19	277203	Chr16	+	32.4086	32.409	UNC24671083	Chr14	105.471	104.94	108.806	8.2759	8.63221	Trans
17547947	Tm4sf19	transmembrane 4 L six family member 19	277203	Chr16	+	32.4086	32.409	UNC3844591	Chr2	119.749	118.846	121.727	8.2759	9.41904	Trans
17332766	Zdhhc14	zinc finger, DHHC domain containing 14	224454	Chr17	+	5.49267	5.75377	JAX00430367	Chr17	6.03213	4.62552	7.23272	7.72487	11.2815	Cis
17332783	Snx9	sorting nexin 9	66616	Chr17	+	5.84143	5.93176	UNC27522753	Chr17	5.80315	5.67952	5.99154	7.74548	15.7228	Cis
17332923	Dynlt1c	dynein light chain Tctex-type 1C	100040563	Chr17	+	6.60844	6.60847	UNC170287005	Chr17	6.31822	6.20377	6.31822	7.80444	28.1285	Cis
17333505	Gm3435	predicted gene 3435	100041621	Chr17	+	15.0099	15.01	UNC27599582	Chr17	15.1498	14.7506	15.5751	8.32403	25.7175	Cis
17333589	Chd1	chromodomain helicase DNA binding protein 1	12648	Chr17	+	15.7051	15.7706	backupUNC170463469	Chr17	15.4475	15.2952	16.1898	7.92132	15.7395	Cis
17333895	Vmn1r235	vomeronasal 1 receptor 235	171233	Chr17	+	21.2605	21.2629	UNC26521774	Chr16	26.7101	25.7881	27.6	8.06041	9.492	Trans
17334205	Abca3	ATP-binding cassette, sub-family A (ABC1), member 3	27410	Chr17	+	24.3521	24.4101	UNC27688268	Chr17	24.4048	23.9276	25.3919	7.98175	13.6973	Cis
17334253	Eci1	enoyl-Coenzyme A delta isomerase 1	13177	Chr17	+	24.4269	24.4393	UNC27681660	Chr17	23.8162	23.6605	25.3919	7.76358	8.83241	Cis
17334365	Zfp598	zinc finger protein 598	213753	Chr17	+	24.6699	24.6813	UNC27701176	Chr17	25.5937	24.4048	26.037	8.08711	13.7502	Cis
17334449	Hagh	hydroxyacyl glutathione hydrolase	14651	Chr17	+	24.8402	24.8644	UNC27698351	Chr17	25.3486	18.815	26.4688	7.87179	10.846	Cis
17334489	Mrps34	mitochondrial ribosomal protein S34	79044	Chr17	+	24.8951	24.8963	UNC24806187	Chr14	114.867	107.598	117.539	7.87994	7.89091	Trans
17334495	Nme3	NME/NM23 nucleoside diphosphate kinase 3	79059	Chr17	+	24.8965	24.8975	UNC27701751	Chr17	25.6487	23.8162	26.3891	8.02944	9.23038	Cis
17334636	Gm17801	predicted gene, 17801	100272221	Chr17	+	25.2742	25.2755	JAX00242019	Chr1	11.9705	10.0983	31.579	7.78986	8.14784	Trans
17334648	Prss28	protease, serine 28	114661	Chr17	+	25.3086	25.3119	JAX00145112	Chr6	107.711	107.48	110.633	8.18334	8.72336	Trans
17334722	Rpusd1	RNA pseudouridylate synthase domain containing 1	106707	Chr17	+	25.7278	25.7314	JAX00434437	Chr17	26.2828	17.6227	26.8619	7.73568	8.49751	Cis
17334883	Rgs11	regulator of G-protein signaling 11	50782	Chr17	+	26.203	26.2111	UNC27718736	Chr17	26.9647	23.9276	28.2176	7.70766	9.39671	Cis
17334948	Atp6v0e	ATPase, H+ transporting, lysosomal V0 subunit E	11974	Chr17	+	26.6764	26.6994	UNC27719439	Chr17	27.0232	26.7305	27.0742	7.6423	22.1852	Cis
17335177	Uhrf1bp1	UHRF1 (ICBP90) binding protein 1	224648	Chr17	+	27.8566	27.8959	UNC27723287	Chr17	27.4194	25.6487	28.2176	7.92747	9.73332	Cis
17335204	Anks1	ankyrin repeat and SAM domain containing 1	224650	Chr17	+	27.9094	28.0616	UNC27727268	Chr17	27.7209	27.4581	31.3295	7.59351	10.0097	Cis
17335790	LOC102631757	uncharacterized LOC102631757	102631757	Chr17	+	31.1528	31.1629	UNC27766827	Chr17	31.1329	29.9102	31.1433	8.70351	17.6164	Cis
17335798	Ubash3a	ubiquitin associated and SH3 domain containing, A	328795	Chr17	+	31.2079	31.2418	UNC27768995	Chr17	31.3536	29.9724	31.3678	8.10955	12.9453	Cis
17335818	Slc37a1	solute carrier family 37 (glycerol-3-phosphate transporter), member 1	224674	Chr17	+	31.2957	31.3503	UNC27768354	Chr17	31.2968	31.2273	31.3578	7.77905	19.2951	Cis
17335936	Cyp4f39	cytochrome P450, family 4, subfamily f, polypeptide 39	320997	Chr17	+	32.4655	32.4929	UNC27771211	Chr17	31.4864	31.3536	33.0898	7.67757	10.2301	Cis
17335952	Cyp4f17	cytochrome P450, family 4, subfamily f, polypeptide 17	208285	Chr17	+	32.5065	32.5241	UNC27794178	Chr17	33.4321	32.5284	33.5614	7.742	10.3604	Cis
17336028	Gm17115	predicted gene 17115	102632854	Chr17	+	32.7884	32.7895	UNC170307846	Chr17	32.3114	31.7663	33.0898	7.89787	10.7374	Cis
17336213	Daxx	Fas death domain-associated protein	13163	Chr17	+	33.9096	33.9155	UNC11365927	Chr6	73.8366	70.3737	77.155	7.7464	7.9646	Trans
17336245	Rgl2	ral guanine nucleotide dissociation stimulator-like 2	19732	Chr17	+	33.9296	33.9376	UNC27768575	Chr17	31.3295	31.2586	32.688	8.1132	8.58231	Trans
17336286	Vps52	VPS52 GARP complex subunit	224705	Chr17	+	33.9558	33.9665	UNC27796216	Chr17	33.7166	31.9914	35.9396	7.70975	10.9825	Cis
17336502	H2-Eb1	histocompatibility 2, class II antigen E beta	14969	Chr17	+	34.3059	34.3166	JAX00436823	Chr17	34.1932	33.9728	34.536	7.46216	17.4783	Cis
17336536	BC051142	cDNA sequence BC051142	407788	Chr17	+	34.4165	34.4606	UNC27809137	Chr17	34.4282	31.866	34.9626	7.7481	12.4064	Cis
17336896	Clic1	chloride intracellular channel 1	114584	Chr17	+	35.05	35.0587	UNC29510212	Chr18	68.5065	67.5685	68.6718	7.73967	8.52419	Trans
17336965	Ly6g5c	lymphocyte antigen 6 complex, locus G5C	114652	Chr17	+	35.1083	35.112	UNC17964227	Chr10	52.5167	50.6097	53.189	7.72534	8.73301	Trans
17337036	Atp6v1g2	ATPase, H+ transporting, lysosomal V1 subunit G2	66237	Chr17	+	35.2351	35.2386	UNC27822205	Chr17	35.7224	32.1186	41.9709	7.74183	8.14083	Cis
17337122	H2-Q6	histocompatibility 2, Q region locus 6	110557	Chr17	+	35.4257	35.4299	UNC170076048	Chr17	35.5347	35.0926	36.2639	8.00449	20.0091	Cis
17337250	Mdc1	mediator of DNA damage checkpoint 1	240087	Chr17	+	35.8415	35.859	UNC27839427	Chr17	37.1273	32.3388	42.3693	7.71132	9.68576	Cis
17337491	Znrd1as	zinc ribbon domain containing 1, antisense	76416	Chr17	+	36.9586	36.9656	UNC27823841	Chr17	35.9366	35.8597	41.7469	8.47225	16.4118	Cis
17337599	Olfr123	olfactory receptor 123	258623	Chr17	+	37.7955	37.7964	UNC16630803	Chr9	73.763	73.4203	74.5018	9.13891	9.2	Trans
17337719	Mut	methylmalonyl-Coenzyme A mutase	17850	Chr17	+	40.9347	40.9612	UNC27865586	Chr17	41.9709	40.784	41.9709	8.19913	13.9164	Cis
17337750	Adgrf1	adhesion G protein-coupled receptor F1	77596	Chr17	+	43.2704	43.3247	UNC27883133	Chr17	43.1114	42.8598	43.4705	7.61506	13.1032	Cis
17337796	Pla2g7	phospholipase A2, group VII (platelet-activating factor acetylhydrolase, plasma)	27226	Chr17	+	43.5681	43.6121	UNC27900428	Chr17	44.0273	42.8598	47.9906	7.60868	8.03126	Cis
17337844	Enpp5	ectonucleotide pyrophosphatase/phosphodiesterase 5	83965	Chr17	+	44.0789	44.0863	UNC27915571	Chr17	45.2042	43.5102	45.4543	7.7507	9.75255	Cis
17337974	Mrps18a	mitochondrial ribosomal protein S18A	68565	Chr17	+	46.1111	46.1288	UNC27929045	Chr17	46.2399	46.029	46.9048	7.86546	8.31017	Cis
17338196	2310039H08Rik	RIKEN cDNA 2310039H08 gene	67101	Chr17	+	46.7726	46.7734	UNC27936683	Chr17	46.9096	46.0641	47.4984	7.70602	9.54866	Cis
17338521	Plcl2	phospholipase C-like 2	224860	Chr17	+	50.5097	50.6884	UNC27977521	Chr17	49.5052	49.1331	51.4148	7.75391	13.9964	Cis
17338536	Gm20098	predicted gene, 20098	100504169	Chr17	+	51.8827	51.9649	UNC9480810	Chr5	75.1283	74.0202	75.9167	8.79583	9.62073	Trans
17338650	Ccdc94	coiled-coil domain containing 94	72886	Chr17	+	55.9592	55.9679	JAX00442337	Chr17	55.5289	55.2645	56.9197	7.884	10.161	Cis
17338925	Clpp	caseinolytic mitochondrial matrix peptidase proteolytic subunit	53895	Chr17	+	56.9903	56.9961	UNC28076033	Chr17	56.9851	56.0565	59.0058	7.77095	7.98163	Cis
17339066	Nudt12os	nudix (nucleoside diphosphate linked moiety X)-type motif 12, opposite strand	75039	Chr17	+	58.9963	59.0249	UNC28059031	Chr17	55.3363	55.2645	60.5901	7.71723	10.1765	Trans
17339223	Lama1	laminin, alpha 1	16772	Chr17	+	67.7167	67.8226	UNC28238292	Chr17	67.9284	67.4603	68.487	7.71516	11.0461	Cis
17339434	Lpin2	lipin 2	64898	Chr17	+	71.1837	71.2478	UNC28305648	Chr17	72.0779	71.012	72.1714	7.94664	12.382	Cis
17339499	Snord53	small nucleolar RNA, C/D box 53	100217456	Chr17	+	71.6409	71.6409	UNC28300085	Chr17	71.7614	71.3385	73.0443	7.73266	15.573	Cis
17339529	Clip4	CAP-GLY domain containing linker protein family, member 4	78785	Chr17	+	71.7697	71.8573	UNC28298742	Chr17	71.6727	70.5004	71.8295	8.10474	11.0853	Cis
17339858	Cebpzos	CCAAT/enhancer binding protein (C/EBP), zeta, opposite strand	68554	Chr17	+	78.9166	78.9206	JAX00078576	Chr17	79.335	78.2743	80.0012	7.83656	7.90502	Cis
17339876	Qpct	glutaminyl-peptide cyclotransferase (glutaminyl cyclase)	70536	Chr17	+	79.052	79.0899	UNC28415874	Chr17	79.0202	78.5521	79.5267	7.72834	9.74139	Cis
17339934	Morn2	MORN repeat containing 2	378462	Chr17	+	80.2902	80.2975	UNC28438485	Chr17	80.3447	79.4872	80.4946	9.08384	10.7113	Cis
17339934	Morn2	MORN repeat containing 2	378462	Chr17	+	80.2902	80.2975	UNC4149656	Chr2	144.832	144.832	145.115	9.08384	9.96121	Trans
17340197	Epas1	endothelial PAS domain protein 1	13819	Chr17	+	86.7541	86.833	UNC170216878	Chr17	86.5346	86.0056	87.5321	7.62752	9.0545	Cis
17340220	Rhoq	ras homolog family member Q	104215	Chr17	+	86.9633	86.9984	UNC28522047	Chr17	86.1287	85.946	87.3076	7.67722	12.9227	Cis
17340220	Rhoq	ras homolog family member Q	104215	Chr17	+	86.9633	86.9984	UNC8249361	Chr4	132.875	131.391	132.955	7.67722	8.21902	Trans
17340244	Ttc7	tetratricopeptide repeat domain 7	225049	Chr17	+	87.2831	87.3806	UNC28530860	Chr17	86.742	85.4333	88.7824	7.56521	9.63139	Cis
17340332	Ppp1r21	protein phosphatase 1, regulatory subunit 21	73825	Chr17	+	88.5303	88.5883	UNC28558784	Chr17	88.6077	88.4645	88.8896	7.86403	9.08423	Cis
17340449	Tfb1m	transcription factor B1, mitochondrial	224481	Chr17	-	3.51928	3.5577	backupUNC170283680	Chr17	3.26496	3.26496	4.4146	8.34745	13.7391	Cis
17340609	Ezr	ezrin	22350	Chr17	-	6.73807	6.78269	UNC27510238	Chr17	5.01151	4.75062	9.11191	7.6954	9.37765	Cis
17340730	4930506C21Rik	RIKEN cDNA 4930506C21 gene	75060	Chr17	-	8.29342	8.29863	UNC17762762	Chr10	37.0013	36.52	37.63	7.80979	8.65162	Trans
17341148	LOC106740	uncharacterized LOC106740	106740	Chr17	-	14.9478	14.9488	UNC27600022	Chr17	15.198	14.9161	16.1898	7.69252	13.3532	Cis
17341197	Psmb1	proteasome (prosome, macropain) subunit, beta type 1	19170	Chr17	-	15.4758	15.4983	JAX00046866	Chr13	81.667	71.9558	83.8883	7.97385	8.17533	Trans
17341399	Zfp994	zinc finger protein 994	240038	Chr17	-	22.1974	22.2003	UNC27611394	Chr17	16.2806	15.9479	20.7796	7.61678	14.8764	Trans
17341433	Gm16386	zinc finger protein 946 pseudogene	100042679	Chr17	-	22.7799	22.8177	UNC24780108	Chr14	112.714	106.778	112.827	7.78312	7.84492	Trans
17341440	Zfp945	zinc finger protein 945	240041	Chr17	-	22.8472	22.8671	UNC27688268	Chr17	24.4048	19.403	26.2828	7.76048	11.1808	Cis
17341547	Cldn9	claudin 9	56863	Chr17	-	23.6827	23.684	UNC27683217	Chr17	23.9679	22.8852	25.4895	7.73345	10.8882	Cis
17341625	Elob	elongin B	67673	Chr17	-	23.8247	23.8289	UNC27679622	Chr17	23.6016	22.5582	25.1206	7.80488	12.9206	Cis
17341641	Prss41	protease, serine 41	71003	Chr17	-	23.8368	23.8439	UNC27681660	Chr17	23.8162	16.5948	23.9276	7.89946	8.01457	Cis
17341781	Ccnf	cyclin F	12449	Chr17	-	24.2226	24.2514	UNC26488701	Chr16	24.353	22.985	24.3739	8.55691	10.4786	Trans
17341803	Abca17	ATP-binding cassette, sub-family A (ABC1), member 17	381072	Chr17	-	24.2653	24.351	UNC27706510	Chr17	26.0741	25.5937	26.3891	7.47552	18.3374	Cis
17342024	Snhg9	small nucleolar RNA host gene 9	73474	Chr17	-	24.7196	24.72	UNC12274309	Chr6	142.807	137.48	142.966	8.56999	8.82988	Trans
17342308	Chtf18	CTF18, chromosome transmission fidelity factor 18	214901	Chr17	-	25.719	25.7274	UNC27703625	Chr17	25.7941	24.09	26.5248	7.65894	11.5666	Cis
17342359	Haghl	hydroxyacylglutathione hydrolase-like	68977	Chr17	-	25.7799	25.7856	UNC170064105	Chr17	26.5624	24.3439	26.8364	7.9054	24.7151	Cis
17342376	Fam173a	family with sequence similarity 173, member A	214917	Chr17	-	25.7905	25.7924	UNC27703127	Chr17	25.7385	24.9491	26.443	8.04589	13.6604	Cis
17342376	Fam173a	family with sequence similarity 173, member A	214917	Chr17	-	25.7905	25.7924	UNC4491016	Chr2	170.455	170.247	170.699	8.04589	8.21254	Trans
17342483	Mcrip2	MAPK regulated corepressor interacting protein 2	68241	Chr17	-	25.8638	25.8687	JAX00434363	Chr17	26.037	23.5352	26.8619	7.72361	13.7119	Cis
17342581	Decr2	2-4-dienoyl-Coenzyme A reductase 2, peroxisomal	26378	Chr17	-	26.0819	26.0902	backupUNC170300728	Chr17	26.2561	23.9633	26.539	8.42169	8.55294	Cis
17342719	Grm4	glutamate receptor, metabotropic 4	268934	Chr17	-	27.4225	27.5133	UNC27719640	Chr17	27.0365	26.8619	27.2168	7.87351	25.7131	Cis
17342740	AI413582	expressed sequence AI413582	106672	Chr17	-	27.5637	27.5657	UNC27737064	Chr17	28.7297	27.793	29.9102	7.79083	10.7625	Cis
17342785	D17Wsu92e	DNA segment, Chr 17, Wayne State University 92, expressed	224647	Chr17	-	27.7519	27.8203	UNC21085046	Chr12	50.2525	46.6663	58.5332	7.62144	8.03772	Trans
17342785	D17Wsu92e	DNA segment, Chr 17, Wayne State University 92, expressed	224647	Chr17	-	27.7519	27.8203	UNC20271502	Chr11	102.762	18.9392	103.652	7.62144	7.71646	Trans
17342916	Slc26a8	solute carrier family 26, member 8	224661	Chr17	-	28.6381	28.6848	UNC27735102	Chr17	28.5157	28.1908	29.7695	7.83474	12.0406	Cis
17343026	Ppil1	peptidylprolyl isomerase (cyclophilin)-like 1	68816	Chr17	-	29.2508	29.2642	UNC27725147	Chr17	27.585	26.5248	28.8073	7.63271	9.31498	Cis
17343079	Ccdc167	coiled-coil domain containing 167	68597	Chr17	-	29.6967	29.717	UNC28750701	Chr18	12.7352	6.11599	12.8849	7.72224	7.79737	Trans
17343119	Btbd9	BTB (POZ) domain containing 9	224671	Chr17	-	30.2158	30.5764	UNC27737064	Chr17	28.7297	27.4581	30.3598	7.55531	8.95847	Cis
17343141	Gm6402	ribosomal protein S17 pseudogene	623169	Chr17	-	30.3948	30.3961	UNC27753962	Chr17	29.9724	28.5402	31.1912	7.92839	8.76234	Cis
17343143	Glo1	glyoxalase 1	109801	Chr17	-	30.5929	30.6127	UNC27759648	Chr17	30.5835	29.9236	30.7588	7.72034	26.6209	Cis
17343196	Rsph1	radial spoke head 1 homolog (Chlamydomonas)	22092	Chr17	-	31.2551	31.2773	UNC27763409	Chr17	30.952	30.6668	31.3295	7.82815	13.5107	Cis
17343469	Zfp811	zinc finger protein 811	240063	Chr17	-	32.7974	32.8099	UNC27783294	Chr17	32.4923	30.6348	33.7166	7.73878	13.0622	Cis
17343488	Cyp4f14	cytochrome P450, family 4, subfamily f, polypeptide 14	64385	Chr17	-	32.9053	32.9173	UNC27790128	Chr17	32.9302	32.2976	35.9396	7.81893	9.7337	Cis
17343505	Cyp4f13	cytochrome P450, family 4, subfamily f, polypeptide 13	170716	Chr17	-	32.9247	32.9474	UNC27768995	Chr17	31.3536	28.0608	33.0898	7.82855	8.85353	Cis
17343552	Zfp955a	zinc finger protein 955A	77652	Chr17	-	33.2398	33.2418	UNC27818801	Chr17	35.5036	31.6757	35.7224	8.34377	11.0912	Trans
17343678	Pfdn6	prefoldin subunit 6	14976	Chr17	-	33.9388	33.9403	UNC27798497	Chr17	33.9386	32.1795	35.0702	7.45997	11.0899	Cis
17343678	Pfdn6	prefoldin subunit 6	14976	Chr17	-	33.9388	33.9403	UNC4561486	Chr2	178.095	175.178	179.388	7.45997	7.85049	Trans
17343735	H2-Ke6	H2-K region expressed gene 6	14979	Chr17	-	34.0261	34.0278	UNC27801762	Chr17	34.1024	33.6617	34.536	7.73147	11.4018	Cis
17343827	H2-Ea-ps	histocompatibility 2, class II antigen E alpha, pseudogene	100504404	Chr17	-	34.342	34.3475	UNC27808175	Chr17	34.3715	34.1932	34.4556	8.04641	26.7206	Cis
17343882	Egfl8	EGF-like domain 8	81701	Chr17	-	34.6134	34.616	UNC27910418	Chr17	44.6878	33.9728	47.0474	7.90689	8.58381	Trans
17343918	C4b	complement component 4B (Chido blood group)	12268	Chr17	-	34.7284	34.7439	UNC27795757	Chr17	33.6125	31.8169	33.9728	8.09567	9.09641	Cis
17344064	Cfb	complement factor B	14962	Chr17	-	34.8564	34.8624	JAX00075291	Chr17	35.0312	34.0451	36.9187	9.10776	24.9264	Cis
17344086	C2	complement component 2 (within H-2S)	12263	Chr17	-	34.8627	34.8983	UNC27814443	Chr17	34.9979	34.2931	35.0702	8.88837	29.8587	Cis
17344114	1110038B12Rik	RIKEN cDNA 1110038B12 gene	68763	Chr17	-	34.9503	34.9525	UNC27813303	Chr17	34.8431	18.815	35.0312	7.68904	8.56053	Cis
17344158	Msh5	mutS homolog 5	17687	Chr17	-	35.0286	35.0464	UNC27813774	Chr17	34.9083	31.3678	35.2319	7.72078	8.54652	Cis
17344238	Gm20522	predicted gene 20522	105245272	Chr17	-	35.1228	35.1263	UNC27891647	Chr17	43.5681	29.2782	44.3975	7.68372	10.4374	Trans
17344593	H2-T22	histocompatibility 2, T region locus 22	15039	Chr17	-	36.0402	36.0425	JAX00437712	Chr17	36.9187	32.1795	40.5237	7.76616	8.38416	Cis
17344608	H2-T3	histocompatibility 2, T region locus 3	15043	Chr17	-	36.1861	36.1903	UNC382234	Chr1	31.7283	26.1572	32.0822	7.90266	8.72625	Trans
17344642	H2-T10	histocompatibility 2, T region locus 10	15024	Chr17	-	36.1162	36.1193	UNC27822205	Chr17	35.7224	35.6066	36.4134	7.7684	13.1582	Cis
17344698	Rpp21	ribonuclease P 21 subunit	67676	Chr17	-	36.2557	36.258	JAX00437712	Chr17	36.9187	35.3279	37.0663	7.79918	9.79441	Cis
17344850	Olfr95	olfactory receptor 95	258506	Chr17	-	37.2109	37.2117	UNC030308693	Chr3	52.6174	51.1489	59.204	7.99096	8.036	Trans
17345016	Adgrf4	adhesion G protein-coupled receptor F4	78249	Chr17	-	42.657	42.6923	UNC6329147	Chr3	136.725	136.233	137.388	7.95274	8.27671	Trans
17345066	Mep1a	meprin 1 alpha	17287	Chr17	-	43.4744	43.5028	UNC27870438	Chr17	42.3693	36.9746	43.5362	10.549	15.9281	Cis
17345170	Spats1	spermatogenesis associated, serine-rich 1	71020	Chr17	-	45.4459	45.4749	UNC100038807	Chr10	24.6449	24.1196	27.5244	7.8742	8.10793	Trans
17345230	Mymx	myomixer, myoblast fusion factor	653016	Chr17	-	45.601	45.6021	UNC27920115	Chr17	45.512	44.8994	45.7618	7.67219	17.0985	Cis
17345306	Rsph9	radial spoke head 9 homolog (Chlamydomonas)	75564	Chr17	-	46.122	46.1442	UNC10717277	Chr6	22.85	22.6038	22.9548	7.60758	8.54963	Trans
17345306	Rsph9	radial spoke head 9 homolog (Chlamydomonas)	75564	Chr17	-	46.122	46.1442	UNC27930131	Chr17	46.3407	46.1398	46.8319	7.60758	13.5296	Cis
17345706	Tomm6	translocase of outer mitochondrial membrane 6 homolog (yeast)	66119	Chr17	-	47.6868	47.6884	UNC27946586	Chr17	47.4819	43.3492	48.495	7.85568	8.00685	Cis
17345926	Satb1	special AT-rich sequence binding protein 1	20230	Chr17	-	51.7366	51.8327	UNC8767358	Chr5	21.4123	21.3137	21.4123	10.2575	11.5198	Trans
17345989	Sult1c2	sulfotransferase family, cytosolic, 1C, member 2	69083	Chr17	-	53.8297	53.8463	UNC28033104	Chr17	53.6835	53.5633	53.6835	9.87818	17.3864	Cis
17346043	Pot1b	protection of telomeres 1B	72836	Chr17	-	55.653	55.7126	JAX00442189	Chr17	54.7532	53.8419	56.0989	7.78639	8.68829	Cis
17346226	Arrdc5	arrestin domain containing 5	76920	Chr17	-	56.2941	56.3002	UNC25988278	Chr15	82.9732	3.26926	83.0336	7.87784	8.54046	Trans
17346231	Ptprs	protein tyrosine phosphatase, receptor type, S	19280	Chr17	-	56.4126	56.4622	UNC28065431	Chr17	55.8224	55.3539	59.0058	7.93443	8.02249	Cis
17346618	Nudt12	nudix (nucleoside diphosphate linked moiety X)-type motif 12	67993	Chr17	-	58.9998	59.0134	JAX00442843	Chr17	58.9299	57.9964	59.0058	7.55682	16.7628	Cis
17346956	Myl12b	myosin, light chain 12B, regulatory	67938	Chr17	-	70.9739	70.9907	UNC170347658	Chr17	71.0257	67.7044	71.5529	7.83079	8.25664	Cis
17347114	Capn13	calpain 13	381122	Chr17	-	73.3067	73.3993	JAX00401503	Chr15	55.0687	54.781	55.8469	7.86956	10.7497	Trans
17347139	Galnt14	polypeptide N-acetylgalactosaminyltransferase 14	71685	Chr17	-	73.4936	73.7104	UNC28343906	Chr17	74.5442	73.013	75.3358	7.71316	10.4506	Cis
17347163	Xdh	xanthine dehydrogenase	22436	Chr17	-	73.8842	73.9502	UNC28349283	Chr17	74.9436	72.8187	75.2303	7.69364	9.33911	Cis
17347267	Fez2	fasciculation and elongation protein zeta 2 (zygin II)	225020	Chr17	-	78.3702	78.418	UNC28406281	Chr17	78.4619	77.6508	78.5077	7.76764	16.5577	Cis
17347353	Gm6548	eukaryotic translation elongation factor 1 alpha 1 pseudogene	625054	Chr17	-	78.851	78.8525	UNC28409266	Chr17	78.6424	78.5736	78.9616	7.71976	13.4467	Cis
17347650	Haao	3-hydroxyanthranilate 3,4-dioxygenase	107766	Chr17	-	83.8315	83.8468	UNC28490482	Chr17	83.8516	83.751	84.6872	8.042	15.4462	Cis
17347666	Gm19696	predicted gene, 19696	100503447	Chr17	-	84.1342	84.1564	UNC28488936	Chr17	83.751	83.751	84.7274	7.68622	10.8806	Cis
17347888	Pigf	phosphatidylinositol glycan anchor biosynthesis, class F	18701	Chr17	-	86.9973	87.0238	UNC28530860	Chr17	86.742	86.1805	87.3547	7.82308	11.5711	Cis
17347903	Mcfd2	multiple coagulation factor deficiency 2	193813	Chr17	-	87.255	87.2659	UNC28529195	Chr17	86.6543	86.2252	87.2772	7.59122	10.2888	Cis
17347990	Lhcgr	luteinizing hormone/choriogonadotropin receptor	16867	Chr17	-	88.7416	88.7919	UNC27386497	Chr16	91.1642	90.6943	91.2727	7.82469	8.53104	Trans
17348069	Gm1976	predicted gene 1976	100038746	Chr17	-	94.76	94.8348	JAX00079641	Chr17	93.6099	93.6099	94.8265	7.89567	7.93869	Cis
17548032	Stk-ps1	serine/threonine kinase, pseudogene 1	545204	Chr17	-	36.3972	36.3986	UNC120000974	Chr12	5.60004	5.29143	5.88566	7.81316	11.4934	Trans
17348449	Riok3	RIO kinase 3	66878	Chr18	+	12.1289	12.1558	UNC28749655	Chr18	12.6694	11.3488	12.7352	7.71315	26.6538	Cis
17348492	Lama3	laminin, alpha 3	16774	Chr18	+	12.3342	12.5826	JAX00080343	Chr18	11.0784	7.08722	12.8849	7.80229	14.6009	Cis
17348638	Psma8	proteasome (prosome, macropain) subunit, alpha type, 8	73677	Chr18	+	14.7062	14.7623	UNC28798957	Chr18	16.7492	15.1547	16.8377	7.77773	9.50192	Trans
17348638	Psma8	proteasome (prosome, macropain) subunit, alpha type, 8	73677	Chr18	+	14.7062	14.7623	UNC14788711	Chr8	56.4151	50.678	57.5388	7.77773	8.09896	Trans
17348666	4933424G05Rik	RIKEN cDNA 4933424G05 gene	74456	Chr18	+	14.989	15.0471	UNC19548105	Chr11	46.2233	44.5778	46.4411	7.71187	7.75112	Trans
17348833	Ttr	transthyretin	22139	Chr18	+	20.6653	20.6742	UNC28853211	Chr18	21.0312	20.6605	21.0931	7.84919	27.5686	Cis
17348965	Galnt1	polypeptide N-acetylgalactosaminyltransferase 1	14423	Chr18	+	24.2054	24.2866	UNC946547	Chr1	74.4743	73.278	75.2577	7.79846	7.93064	Trans
17349357	Gm10549	predicted gene 10549	433171	Chr18	+	33.4642	33.4743	UNC23209882	Chr13	99.8877	95.9132	100.667	7.71952	7.76329	Trans
17349520	Ctnna1	catenin (cadherin associated protein), alpha 1	12385	Chr18	+	35.1189	35.2546	UNC29025062	Chr18	34.1214	34.0508	35.9145	7.84872	11.9221	Cis
17349643	Slc4a9	solute carrier family 4, sodium bicarbonate cotransporter, member 9	240215	Chr18	+	36.5282	36.5562	UNC29046994	Chr18	36.2027	35.1338	36.806	7.71172	10.4231	Cis
17349721	Slc35a4	solute carrier family 35, member A4	67843	Chr18	+	36.6793	36.6839	UNC23069119	Chr13	90.4954	90.3717	91.3719	7.78911	8.28273	Trans
17349745	Ik	IK cytokine	24010	Chr18	+	36.7447	36.7575	UNC29041050	Chr18	35.5849	35.1338	36.3983	7.61326	10.2842	Cis
17349906	Pcdhb12	protocadherin beta 12	93883	Chr18	+	37.4356	37.4386	backupUNC010608551	Chr1	132.515	129.266	133.176	7.62862	8.89842	Trans
17349974	2010320O07Rik	RIKEN cDNA 2010320O07 gene	69881	Chr18	+	38.2098	38.2291	JAX00299922	Chr10	117.967	117.698	117.994	7.7975	9.62672	Trans
17350032	Gm5820	predicted gene 5820	545253	Chr18	+	38.8927	38.971	UNC29078380	Chr18	38.8717	38.8325	39.5678	8.23147	11.7572	Cis
17350040	Arhgap26	Rho GTPase activating protein 26	71302	Chr18	+	38.9932	39.3746	UNC29084399	Chr18	39.279	38.8571	40.0229	7.73614	7.99187	Cis
17350040	Arhgap26	Rho GTPase activating protein 26	71302	Chr18	+	38.9932	39.3746	UNC10022966	Chr5	119.506	118.879	120.746	7.73614	8.46228	Trans
17350243	Spink6	serine peptidase inhibitor, Kazal type 6	433180	Chr18	+	44.0714	44.0836	UNC22225370	Chr13	20.105	18.3811	22.8694	8.07916	8.32661	Trans
17350243	Spink6	serine peptidase inhibitor, Kazal type 6	433180	Chr18	+	44.0714	44.0836	UNC29141664	Chr18	43.4826	43.1911	44.0327	8.07916	15.2219	Cis
17350262	Npy6r	neuropeptide Y receptor Y6	18169	Chr18	+	44.2701	44.2776	UNC29290809	Chr18	54.2514	43.3534	55.0266	7.56453	8.37878	Trans
17350408	Commd10	COMM domain containing 10	69456	Chr18	+	46.9589	47.2332	UNC29212264	Chr18	48.4351	46.906	48.9481	7.65837	21.8904	Cis
17350441	1700044K03Rik	RIKEN cDNA 1700044K03 gene	67321	Chr18	+	49.5233	49.5244	UNC17745966	Chr10	35.6623	33.0255	38.5889	8.38446	8.45382	Trans
17350591	Sncaip	synuclein, alpha interacting protein (synphilin)	67847	Chr18	+	52.7678	52.9158	UNC29250451	Chr18	51.3476	46.3382	54.0727	7.70549	9.40585	Cis
17350697	Gramd3	GRAM domain containing 3	107022	Chr18	+	56.4004	56.5032	UNC16565892	Chr9	68.8874	68.7396	69.3275	8.30098	9.82177	Trans
17350869	Isoc1	isochorismatase domain containing 1	66307	Chr18	+	58.6596	58.6791	UNC29345742	Chr18	58.1289	57.4748	60.3623	7.87372	15.2393	Cis
17350921	F830016B08Rik	RIKEN cDNA F830016B08 gene	240328	Chr18	+	60.2934	60.3021	backupUNC180282678	Chr18	58.694	58.5639	60.3623	7.87912	7.93501	Cis
17351082	Pde6a	phosphodiesterase 6A, cGMP-specific, rod, alpha	225600	Chr18	+	61.2205	61.2883	UNC29393677	Chr18	61.08	61.0485	62.3446	7.67212	9.65939	Cis
17351143	Sh3tc2	SH3 domain and tetratricopeptide repeats 2	225608	Chr18	+	61.9531	62.0237	UNC29405688	Chr18	61.9812	61.6928	62.1002	7.83777	18.7641	Cis
17351196	Apcdd1	adenomatosis polyposis coli down-regulated 1	494504	Chr18	+	62.9223	62.9525	UNC29423407	Chr18	63.0848	61.2721	64.4609	7.85457	8.82371	Cis
17351420	Gm9926	predicted gene 9926	100503565	Chr18	+	66.5042	66.5113	UNC29475940	Chr18	66.3529	66.3529	67.2448	7.40672	22.2711	Cis
17351446	Impa2	inositol (myo)-1(or 4)-monophosphatase 2	114663	Chr18	+	67.2892	67.3191	UNC29504020	Chr18	68.1108	66.918	68.3508	7.75417	13.5554	Cis
17351457	Cidea	cell death-inducing DNA fragmentation factor, alpha subunit-like effector A	12683	Chr18	+	67.3436	67.3678	UNC16323209	Chr9	48.493	46.8577	72.95	8.10826	8.26561	Trans
17351511	Cep192	centrosomal protein 192	70799	Chr18	+	67.8001	67.885	UNC29510212	Chr18	68.5065	68.1517	68.5725	10.3724	10.9069	Cis
17351634	Ccdc68	coiled-coil domain containing 68	381175	Chr18	+	69.9254	69.9693	UNC180300287	Chr18	69.8989	69.5101	73.4633	8.58954	8.7007	Cis
17351655	Stard6	StAR-related lipid transfer (START) domain containing 6	170461	Chr18	+	70.4725	70.501	UNC29540881	Chr18	70.4984	69.5754	70.7196	7.71873	9.37901	Cis
17351726	Mbd1	methyl-CpG binding domain protein 1	17190	Chr18	+	74.2683	74.2822	UNC29599474	Chr18	74.208	74.0211	74.4528	7.83263	15.9244	Cis
17351811	Acaa2	acetyl-Coenzyme A acyltransferase 2 (mitochondrial 3-oxoacyl-Coenzyme A thiolase)	52538	Chr18	+	74.7871	74.8062	UNC29619489	Chr18	75.5046	73.9693	75.5323	7.88113	14.407	Cis
17351919	Hdhd2	haloacid dehalogenase-like hydrolase domain containing 2	76987	Chr18	+	76.9444	76.9728	UNC29640239	Chr18	76.8014	76.4455	77.0935	13.0474	14.103	Cis
17352175	Mbp	myelin basic protein	17196	Chr18	+	82.4751	82.5855	UNC29719175	Chr18	82.1599	81.7218	82.6586	7.83929	13.4408	Cis
17352229	Cyb5a	cytochrome b5 type A (microsomal)	109672	Chr18	+	84.8513	84.88	UNC29745638	Chr18	83.9395	83.8834	90.595	7.65298	8.47302	Cis
17352549	Mpp7	membrane protein, palmitoylated 7 (MAGUK p55 subfamily member 7)	75739	Chr18	-	7.34897	7.62683	UNC28702402	Chr18	9.27332	5.58611	10.6316	7.63218	14.4089	Cis
17352549	Mpp7	membrane protein, palmitoylated 7 (MAGUK p55 subfamily member 7)	75739	Chr18	-	7.34897	7.62683	UNC16288647	Chr9	45.6751	45.3247	46.7535	7.63218	7.69816	Trans
17352575	Gjd4	gap junction protein, delta 4	225152	Chr18	-	9.27892	9.2828	UNC12277281	Chr6	143.018	141.269	143.558	7.63755	7.83954	Trans
17352580	Ccny	cyclin Y	67974	Chr18	-	9.31496	9.45012	UNC28694830	Chr18	8.62406	5.5265	11.8295	7.64657	9.34318	Cis
17352662	Esco1	establishment of sister chromatid cohesion N-acetyltransferase 1	77805	Chr18	-	10.5668	10.6103	UNC28750701	Chr18	12.7352	9.62284	12.7352	9.17976	16.1547	Trans
17352731	Npc1	NPC intracellular cholesterol transporter 1	18145	Chr18	-	12.1898	12.2363	UNC180253368	Chr18	12.3857	10.9319	13.4627	7.66512	8.95833	Cis
17352763	Ankrd29	ankyrin repeat domain 29	225187	Chr18	-	12.253	12.296	UNC18938362	Chr10	126.013	119.207	127.022	7.62387	8.21642	Trans
17352824	Zfp521	zinc finger protein 521	225207	Chr18	-	13.6875	13.9726	UNC28762722	Chr18	13.7225	12.4021	16.8377	7.60518	10.2227	Cis
17352862	Aqp4	aquaporin 4	11829	Chr18	-	15.392	15.403	JAX00080558	Chr18	13.7956	13.5891	14.4773	7.53951	12.251	Cis
17352985	B4galt6	UDP-Gal:betaGlcNAc beta 1,4-galactosyltransferase, polypeptide 6	56386	Chr18	-	20.686	20.7463	UNC28850626	Chr18	20.7916	20.5091	20.9286	8.54128	11.6383	Cis
17353101	Gm15972	predicted gene 15972	100502834	Chr18	-	23.7505	23.7523	UNC010411487	Chr1	183.551	182.98	183.661	7.79615	7.87177	Trans
17353108	Zscan30	zinc finger and SCAN domain containing 30	328918	Chr18	-	23.9648	23.9872	UNC28904939	Chr18	25.0281	23.7737	27.6655	7.67544	10.4946	Cis
17353131	Ino80c	INO80 complex subunit C	225280	Chr18	-	24.1056	24.1219	UNC28883646	Chr18	23.5439	21.3884	24.9819	7.76999	9.15352	Cis
17353171	Tpgs2	tubulin polyglutamylase complex subunit 2	66648	Chr18	-	25.1289	25.1688	UNC28904939	Chr18	25.0281	21.1278	26.714	7.79008	8.00642	Cis
17353333	A830052D11Rik	RIKEN cDNA A830052D11 gene	402767	Chr18	-	32.3591	32.3782	UNC29017642	Chr18	33.6742	29.4782	33.8369	7.79985	7.82766	Cis
17353412	Reep5	receptor accessory protein 5	13476	Chr18	-	34.3452	34.3734	UNC29024679	Chr18	34.1015	34.0508	34.4911	8.07761	33.0806	Cis
17353412	Reep5	receptor accessory protein 5	13476	Chr18	-	34.3452	34.3734	UNC22712389	Chr13	60.178	57.4243	62.8272	8.07761	8.38066	Trans
17353420	Fam13b	family with sequence similarity 13, member B	225358	Chr18	-	34.4425	34.5066	UNC29040445	Chr18	35.4884	34.5552	37.34	7.73938	7.7761	Cis
17353585	Sil1	endoplasmic reticulum chaperone SIL1 homolog (S. cerevisiae)	81500	Chr18	-	35.2664	35.4989	JAX00456148	Chr18	35.8176	34.0508	35.9895	7.66873	10.6138	Cis
17353650	Ecscr	endothelial cell surface expressed chemotaxis and apoptosis regulator	68545	Chr18	-	35.7133	35.7223	UNC12290577	Chr6	143.997	139.307	144.908	7.64513	8.11154	Trans
17353699	Hbegf	heparin-binding EGF-like growth factor	15200	Chr18	-	36.5056	36.5157	UNC29051067	Chr18	36.7373	36.3983	37.1504	7.71799	19.5401	Cis
17353923	Pcdh1	protocadherin 1	75599	Chr18	-	38.1863	38.212	UNC21480326	Chr12	80.6495	80.6495	81.5499	7.77359	8.40854	Trans
17353934	1700086O06Rik	RIKEN cDNA 1700086O06 gene	73516	Chr18	-	38.2385	38.2506	backupUNC180414314	Chr18	38.2592	27.8506	38.8717	8.21091	9.97782	Cis
17353962	Fgf1	fibroblast growth factor 1	14164	Chr18	-	38.8411	38.9186	UNC30228534	Chr19	34.2005	32.9057	36.7953	7.73862	7.84973	Trans
17353962	Fgf1	fibroblast growth factor 1	14164	Chr18	-	38.8411	38.9186	UNC29078200	Chr18	38.8571	32.0343	39.7825	7.73862	8.69863	Cis
17354071	Gm4013	predicted gene 4013	100042757	Chr18	-	42.2745	42.2752	UNC29124267	Chr18	42.3381	41.862	42.9006	7.89917	16.0227	Cis
17354078	Ppp2r2b	protein phosphatase 2, regulatory subunit B, beta	72930	Chr18	-	42.6376	43.0594	UNC29134633	Chr18	43.0285	41.862	43.099	7.73184	9.32803	Cis
17354157	Spink1	serine peptidase inhibitor, Kazal type 1	20730	Chr18	-	43.7281	43.7372	JAX00082899	Chr18	45.084	45.084	45.084	16.9705	19.3954	Cis
17354258	Mospd4	motile sperm domain containing 4	72076	Chr18	-	46.4649	46.4657	UNC29186661	Chr18	46.6153	46.1836	47.9933	7.78625	9.27162	Cis
17354275	Tmed7	transmembrane p24 trafficking protein 7	66676	Chr18	-	46.5862	46.5975	UNC11745264	Chr6	103.269	101.173	103.668	7.63821	8.47449	Trans
17354290	Atg12	autophagy related 12	67526	Chr18	-	46.7333	46.7416	UNC29189342	Chr18	46.8441	46.3382	47.8803	7.88157	15.9193	Cis
17354299	Sema6a	sema domain, transmembrane domain (TM), and cytoplasmic domain, (semaphorin) 6A	20358	Chr18	-	47.2358	47.3687	JAX00659253	Chr8	3.21146	3.21146	6.04465	8.19535	8.27791	Trans
17354483	4930511M06Rik	RIKEN cDNA 4930511M06 gene	75084	Chr18	-	57.4349	57.5524	UNC29348317	Chr18	58.3056	57.2048	60.1806	7.60114	9.84124	Cis
17354730	Slc26a2	solute carrier family 26 (sulfate transporter), member 2	13521	Chr18	-	61.1932	61.2116	UNC29393677	Chr18	61.08	61.0104	61.4927	7.95544	10.2179	Cis
17354795	Pcyox1l	prenylcysteine oxidase 1 like	240334	Chr18	-	61.6971	61.7076	UNC29412544	Chr18	62.4274	61.6928	63.0848	7.72485	14.2659	Cis
17354804	Grpel2	GrpE-like 2, mitochondrial	17714	Chr18	-	61.7129	61.7263	backupUNC180134519	Chr18	61.6766	61.6766	61.9812	7.88944	28.3117	Cis
17354857	Adrb2	adrenergic receptor, beta 2	11555	Chr18	-	62.1781	62.1799	UNC29417481	Chr18	62.7212	61.0962	64.976	8.12549	8.19166	Cis
17355145	Mppe1	metallophosphoesterase 1	225651	Chr18	-	67.2256	67.2458	JAX00463240	Chr18	67.7813	66.6301	68.1517	7.68134	22.6018	Cis
17355316	Poli	polymerase (DNA directed), iota	26447	Chr18	-	70.5088	70.5306	JAX00465012	Chr18	74.4082	70.3686	74.4528	7.89937	8.99888	Trans
17355411	Mapk4	mitogen-activated protein kinase 4	225724	Chr18	-	73.9286	74.0653	UNC29603367	Chr18	74.507	74.3934	75.5323	7.4908	13.3139	Cis
17355624	Rbfa	ribosome binding factor A	68731	Chr18	-	80.1923	80.2006	UNC29673171	Chr18	79.1904	78.489	81.423	7.77677	12.5478	Cis
17355738	Zfp236	zinc finger protein 236	329002	Chr18	-	82.5952	82.6822	backupJAX00085710	Chr18	82.7143	81.7972	83.7083	7.83149	15.1518	Cis
17355810	Cndp1	carnosine dipeptidase 1 (metallopeptidase M20 family)	338403	Chr18	-	84.6114	84.6499	UNC29778192	Chr18	86.2353	84.0493	90.4415	10.4608	10.857	Cis
17355825	Cndp2	CNDP dipeptidase 2 (metallopeptidase M20 family)	66054	Chr18	-	84.6678	84.682	JAX00085904	Chr18	85.2882	84.4384	85.4989	7.86202	18.5827	Cis
17355935	Tesmin	testis expressed metallothionein like	17771	Chr19	+	3.38888	3.40782	UNC29832192	Chr19	4.31273	3.15174	4.83763	8.04915	14.5845	Cis
17356050	Tbx10	T-box 10	109575	Chr19	+	3.99287	3.99938	JAX00302006	Chr10	126.91	125.667	127.085	7.90086	9.13738	Trans
17356209	A930001C03Rik	RIKEN cDNA A930001C03 gene	319314	Chr19	+	4.439	4.44826	UNC14614712	Chr8	43.2625	43.0055	43.2625	8.43424	8.46111	Trans
17356288	Ctsf	cathepsin F	56464	Chr19	+	4.85515	4.86088	UNC29832192	Chr19	4.31273	4.2352	6.30445	10.7246	12.0648	Cis
17356339	B4gat1	beta-1,4-glucuronyltransferase 1	108902	Chr19	+	5.03894	5.0411	UNC26479103	Chr16	23.5546	22.8196	24.3739	7.82975	10.717	Trans
17356412	4930481A15Rik	RIKEN cDNA 4930481A15 gene	74931	Chr19	+	5.40681	5.42245	repB6_rs30503185	Chr19	3.49056	3.15174	4.16611	7.73348	10.0968	Cis
17356583	Syvn1	synovial apoptosis inhibitor 1, synoviolin	74126	Chr19	+	6.04659	6.05344	UNC8813579	Chr5	24.5768	22.4795	24.8149	7.76694	8.83124	Trans
17356583	Syvn1	synovial apoptosis inhibitor 1, synoviolin	74126	Chr19	+	6.04659	6.05344	UNC27280864	Chr16	84.396	80.0163	87.1489	7.76694	8.24885	Trans
17356604	Fau	Finkel-Biskis-Reilly murine sarcoma virus (FBR-MuSV) ubiquitously expressed (fox derived)	14109	Chr19	+	6.05789	6.05824	UNC29849062	Chr19	6.02784	5.08335	6.67838	8.32284	11.2604	Cis
17356642	Naaladl1	N-acetylated alpha-linked acidic dipeptidase-like 1	381204	Chr19	+	6.10594	6.11574	backupUNC190140806	Chr19	6.22196	5.95037	6.38605	6.99011	18.0172	Cis
17356987	Ppp1r14b	protein phosphatase 1, regulatory (inhibitor) subunit 14B	18938	Chr19	+	6.97514	6.97728	UNC17424659	Chr10	11.5982	8.44379	123.062	7.96852	8.02285	Trans
17357072	Pla2g16	phospholipase A2, group XVI	225845	Chr19	+	7.55746	7.58827	UNC29866758	Chr19	8.35237	7.19936	8.52598	7.81323	8.14984	Cis
17357374	Eef1g	eukaryotic translation elongation factor 1 gamma	67160	Chr19	+	8.96705	8.97848	UNC29871139	Chr19	8.92711	8.86628	9.88812	7.9352	8.59278	Cis
17357418	Fth1	ferritin heavy polypeptide 1	14319	Chr19	+	9.98271	9.98505	UNC19253012	Chr11	23.5177	18.8992	24.9452	7.87979	8.37275	Trans
17357460	Fads1	fatty acid desaturase 1	76267	Chr19	+	10.1829	10.1968	JAX00470180	Chr19	10.1673	8.82708	58.7157	7.63044	8.79633	Cis
17357827	Gm4952	predicted gene 4952	240549	Chr19	+	12.6	12.6276	UNC29903693	Chr19	12.0428	11.4054	14.234	7.70178	13.6653	Cis
17357837	Glyat	glycine-N-acyltransferase	107146	Chr19	+	12.6334	12.653	backupUNC121058314	Chr12	83.4597	82.8589	84.1971	7.85939	8.25598	Trans
17357861	Keg1	kidney expressed gene 1	64697	Chr19	+	12.7097	12.7196	UNC24831220	Chr14	116.622	114.682	118.631	7.88236	8.00206	Trans
17357895	Gm5512	required for meiotic nuclear division 1 pseudogene	433224	Chr19	+	12.9053	12.9067	UNC100007206	Chr10	3.93183	3.18058	7.81124	7.74423	8.99671	Trans
17357971	Gna14	guanine nucleotide binding protein, alpha 14	14675	Chr19	+	16.4363	16.6107	JAX00087252	Chr19	16.1111	14.8949	16.9211	7.85993	20.8736	Cis
17357981	Prune2	prune homolog 2	353211	Chr19	+	16.9562	17.2164	UNC29975528	Chr19	17.3727	12.387	18.2201	7.57102	7.70478	Cis
17357981	Prune2	prune homolog 2	353211	Chr19	+	16.9562	17.2164	UNC21414213	Chr12	75.0084	73.6395	75.4076	7.57102	8.38901	Trans
17358020	Nmrk1	nicotinamide riboside kinase 1	225994	Chr19	+	18.632	18.6515	UNC29996617	Chr19	18.6716	18.6716	18.9296	7.57295	29.8293	Cis
17358051	Trpm6	transient receptor potential cation channel, subfamily M, member 6	225997	Chr19	+	18.75	18.8922	UNC29977806	Chr19	17.4807	17.057	20.6811	7.92166	8.84816	Cis
17358103	Aldh1a1	aldehyde dehydrogenase family 1, subfamily A1	11668	Chr19	+	20.6109	20.643	UNC30019704	Chr19	20.0644	19.3192	20.8133	8.95961	15.6967	Cis
17358165	Trpm3	transient receptor potential cation channel, subfamily M, member 3	226025	Chr19	+	22.4483	22.9896	UNC30068568	Chr19	22.7554	22.6605	22.8459	7.71889	23.2972	Cis
17358266	Tmem252	transmembrane protein 252	226040	Chr19	+	24.6741	24.6795	UNC30100604	Chr19	24.7417	24.5384	25.0548	7.55272	11.3165	Cis
17358274	Dock8	dedicator of cytokinesis 8	76088	Chr19	+	25.0515	25.2017	UNC30106027	Chr19	25.0415	24.6319	25.0548	7.97249	11.5199	Cis
17358500	Gm9895	predicted gene 9895	100503337	Chr19	+	29.0673	29.0695	JAX00475294	Chr19	29.6614	28.777	30.912	7.7721	12.27	Cis
17358503	Rcl1	RNA terminal phosphate cyclase-like 1	59028	Chr19	+	29.1014	29.1437	UNC30174911	Chr19	29.8314	28.3052	31.733	7.822	8.30144	Cis
17358544	Cd274	CD274 antigen	60533	Chr19	+	29.3675	29.3879	UNC10042402	Chr5	121.158	121.076	121.887	8.02488	8.36052	Trans
17358598	Il33	interleukin 33	77125	Chr19	+	29.9251	29.9604	JAX00475330	Chr19	29.9216	29.6825	30.6525	7.80018	19.1415	Cis
17358777	Stambpl1	STAM binding protein like 1	76630	Chr19	+	34.1922	34.2401	UNC30229742	Chr19	34.2824	32.19	34.6786	8.01231	9.52998	Cis
17358825	Ifit3b	interferon-induced protein with tetratricopeptide repeats 3B	667370	Chr19	+	34.608	34.6134	UNC7712824	Chr4	90.1627	88.5914	91.294	7.80264	8.57872	Trans
17359421	Dntt	deoxynucleotidyltransferase, terminal	21673	Chr19	+	41.0294	41.0595	JAX00062135	Chr15	53.9617	53.939	54.1329	13.2607	13.4211	Trans
17359504	Hoga1	4-hydroxy-2-oxoglutarate aldolase 1	67432	Chr19	+	42.0456	42.0707	UNC30335216	Chr19	41.9293	41.5985	42.197	7.85362	13.5187	Cis
17359520	Pi4k2a	phosphatidylinositol 4-kinase type 2 alpha	84095	Chr19	+	42.0909	42.1219	UNC30346115	Chr19	42.6846	38.4346	43.3943	7.42367	7.96763	Cis
17359531	Marveld1	MARVEL (membrane-associating) domain containing 1	277010	Chr19	+	42.1474	42.1516	UNC20669236	Chr12	14.3386	14.2809	15.7435	7.87676	8.11581	Trans
17359531	Marveld1	MARVEL (membrane-associating) domain containing 1	277010	Chr19	+	42.1474	42.1516	UNC30339490	Chr19	42.2391	41.4195	43.3309	7.87676	8.36046	Cis
17359636	Abcc2	ATP-binding cassette, sub-family C (CFTR/MRP), member 2	12780	Chr19	+	43.7824	43.8381	UNC30365399	Chr19	44.0703	43.5777	44.1187	7.62357	18.467	Cis
17359672	Gm10768	predicted gene 10768	100038628	Chr19	+	43.8389	43.8408	UNC30358255	Chr19	43.5777	43.5777	43.9799	7.61697	25.2101	Cis
17359769	Sema4g	sema domain, immunoglobulin domain (Ig), transmembrane domain (TM) and short cytoplasmic domain, (semaphorin) 4G	26456	Chr19	+	44.9891	45.0034	UNC30378192	Chr19	45.0242	43.6032	45.1427	7.80415	8.49659	Cis
17359803	Sfxn3	sideroflexin 3	94280	Chr19	+	45.0477	45.0564	UNC30380457	Chr19	45.1739	45.0242	45.218	7.80275	13.7182	Cis
17359902	Nolc1	nucleolar and coiled-body phosphoprotein 1	70769	Chr19	+	46.0759	46.0847	UNC20962877	Chr12	40.847	40.7491	43.9771	7.60913	7.67448	Trans
17360004	Gm36493	predicted gene, 36493	102640430	Chr19	+	46.3411	46.3752	UNC30398162	Chr19	46.6252	45.8787	47.3546	7.73579	15.1842	Cis
17360181	Slk	STE20-like kinase	20874	Chr19	+	47.5798	47.6444	UNC30407111	Chr19	47.2212	45.729	47.7759	7.68199	12.6255	Cis
17360312	Add3	adducin 3 (gamma)	27360	Chr19	+	53.1405	53.2467	UNC30488845	Chr19	52.2836	52.089	54.8893	7.79535	10.1094	Cis
17360532	Ppnr	per-pentamer repeat gene	26930	Chr19	+	55.8459	55.8487	JAX00470322	Chr19	10.6721	10.1673	14.3777	7.76667	7.95915	Trans
17360537	Habp2	hyaluronic acid binding protein 2	226243	Chr19	+	56.2872	56.3208	UNC30540777	Chr19	55.8051	55.4962	56.3554	7.69515	21.1819	Cis
17360585	Nhlrc2	NHL repeat containing 2	66866	Chr19	+	56.5484	56.5979	UNC30554639	Chr19	56.833	55.4962	57.0077	8.1354	16.0244	Cis
17360877	Fam45a	family with sequence similarity 45, member A	67894	Chr19	+	60.8116	60.8359	JAX00482013	Chr19	61.093	59.9746	61.2613	7.76889	7.9435	Cis
17361032	Ndufs8	NADH dehydrogenase (ubiquinone) Fe-S protein 8	225887	Chr19	-	3.90887	3.91265	UNC4149656	Chr2	144.832	144.832	145.115	10.1734	10.3168	Trans
17361073	Gstp1	glutathione S-transferase, pi 1	14870	Chr19	-	4.0367	4.0379	UNC29847961	Chr19	5.95037	4.48445	6.23154	7.63404	7.84245	Cis
17361552	Banf1	barrier to autointegration factor 1	23825	Chr19	-	5.36472	5.36665	UNC16640882	Chr9	74.4767	73.366	75.1374	7.93794	8.10288	Trans
17361890	Capn1	calpain 1	12333	Chr19	-	5.98894	6.01582	UNC29859195	Chr19	7.19936	6.44396	7.65946	7.74372	9.66281	Cis
17361971	Sac3d1	SAC3 domain containing 1	66406	Chr19	-	6.116	6.11851	UNC5853636	Chr3	101.491	97.6987	127.261	7.78154	7.99683	Trans
17361996	Ppp2r5b	protein phosphatase 2, regulatory subunit B', beta	225849	Chr19	-	6.22819	6.23558	UNC29852402	Chr19	6.38605	5.34051	6.44396	8.052	12.7822	Cis
17362111	Esrra	estrogen related receptor, alpha	26379	Chr19	-	6.91128	6.92179	UNC140042044	Chr14	12.2813	11.5217	17.2923	7.90512	8.66864	Trans
17362216	Nudt22	nudix (nucleoside diphosphate linked moiety X)-type motif 22	68323	Chr19	-	6.99307	6.99604	UNC29857813	Chr19	7.04844	6.57105	7.41866	7.72502	12.7145	Cis
17362256	Flrt1	fibronectin leucine rich transmembrane protein 1	396184	Chr19	-	7.09207	7.10567	UNC29859195	Chr19	7.19936	7.04844	7.54141	7.8443	20.4674	Cis
17362356	Slc22a19	solute carrier family 22 (organic anion transporter), member 19	207151	Chr19	-	7.67318	7.71131	UNC29864506	Chr19	7.74873	7.41866	8.35237	8.54587	11.1696	Cis
17362383	Slc22a27	solute carrier family 22, member 27	171405	Chr19	-	7.86455	7.90984	UNC29866051	Chr19	8.16032	7.74873	8.52598	7.78539	26.7282	Cis
17362412	Slc22a29	solute carrier family 22. member 29	236293	Chr19	-	8.16039	8.21887	UNC29868820	Chr19	8.67873	7.34789	8.75717	7.8229	14.6491	Cis
17362467	Tmem179b	transmembrane protein 179B	67706	Chr19	-	8.77252	8.77369	JAX00086716	Chr19	8.81045	8.58075	9.84428	8.11805	14.9555	Cis
17362609	Fen1	flap structure specific endonuclease 1	14156	Chr19	-	10.1997	10.2042	UNC28059114	Chr17	55.3466	55.107	55.9651	7.70603	8.14306	Trans
17362689	Sdhaf2	succinate dehydrogenase complex assembly factor 2	66072	Chr19	-	10.5006	10.5252	JAX00086798	Chr19	10.0492	8.86628	10.6629	7.64216	16.7627	Cis
17362696	Tmem216	transmembrane protein 216	68642	Chr19	-	10.5339	10.5562	JAX00086820	Chr19	10.3336	8.86628	14.7077	7.60495	9.03272	Cis
17362708	Tmem138	transmembrane protein 138	72982	Chr19	-	10.5706	10.5773	UNC29870739	Chr19	8.87742	8.58075	10.66	7.69624	14.2795	Cis
17362801	Tmem109	transmembrane protein 109	68539	Chr19	-	10.8709	10.882	UNC29887070	Chr19	10.7867	10.7	14.8647	7.79911	10.7835	Cis
17362973	Ms4a6d	membrane-spanning 4-domains, subfamily A, member 6D	68774	Chr19	-	11.5867	11.6048	UNC10015981	Chr5	118.986	118.825	119.293	8.14226	8.60178	Trans
17362986	Ms4a2	membrane-spanning 4-domains, subfamily A, member 2	14126	Chr19	-	11.6157	11.6237	UNC6542961	Chr3	151.531	151.366	153.095	7.68922	7.78826	Trans
17363082	Olfr1437	olfactory receptor 1437	258117	Chr19	-	12.3223	12.3224	UNC2128533	Chr1	166.741	166.617	168.233	7.77307	9.57297	Trans
17363162	Olfr1497	olfactory receptor 1497	258736	Chr19	-	13.7947	13.7955	UNC3230084	Chr2	66.3183	65.8447	68.01	7.6778	8.75786	Trans
17363204	Psat1	phosphoserine aminotransferase 1	107272	Chr19	-	15.9048	15.9251	UNC29948342	Chr19	15.7669	14.9286	15.99	7.82137	15.7909	Cis
17363220	Cep78	centrosomal protein 78	208518	Chr19	-	15.9563	15.9848	UNC29952194	Chr19	15.99	12.0043	16.1281	7.74962	13.0117	Cis
17363320	Gcnt1	glucosaminyl (N-acetyl) transferase 1, core 2	14537	Chr19	-	17.3264	17.3728	UNC29992102	Chr19	18.416	17.2217	18.9296	14.5834	24.0695	Cis
17363374	Ostf1	osteoclast stimulating factor 1	20409	Chr19	-	18.5802	18.6318	UNC29995760	Chr19	18.6311	18.2767	18.6716	7.70565	24.9436	Cis
17363407	Anxa1	annexin A1	16952	Chr19	-	20.3735	20.3909	UNC29984302	Chr19	17.9236	17.0992	18.6311	8.67034	9.41524	Trans
17363488	1110059E24Rik	RIKEN cDNA 1110059E24 gene	66206	Chr19	-	21.5975	21.6528	UNC30055933	Chr19	22.0763	21.244	22.3269	9.04806	10.0035	Cis
17363497	C330002G04Rik	RIKEN cDNA C330002G04 gene	77610	Chr19	-	23.0376	23.0758	backupUNC110436385	Chr11	21.3543	20.9013	25.1197	7.49005	7.88017	Trans
17363497	C330002G04Rik	RIKEN cDNA C330002G04 gene	77610	Chr19	-	23.0376	23.0758	UNC30071922	Chr19	22.9945	22.9658	23.2766	7.49005	24.0112	Cis
17363505	Smc5	structural maintenance of chromosomes 5	226026	Chr19	-	23.2085	23.2737	UNC30073044	Chr19	23.0639	22.9658	23.1859	7.56063	27.9243	Cis
17363550	1700028P14Rik	RIKEN cDNA 1700028P14 gene	67483	Chr19	-	23.5588	23.6528	UNC30076257	Chr19	23.3428	22.9658	23.7953	7.84543	13.3313	Cis
17363605	Pip5k1b	phosphatidylinositol-4-phosphate 5-kinase, type 1 beta	18719	Chr19	-	24.2952	24.5559	UNC30097665	Chr19	24.5661	24.3283	24.5905	7.81604	11.5603	Cis
17363626	Pgm5	phosphoglucomutase 5	226041	Chr19	-	24.6788	24.8616	UNC30101148	Chr19	24.7674	24.7122	25.0851	7.87388	13.6347	Cis
17363790	Insl6	insulin-like 6	27356	Chr19	-	29.3214	29.3253	UNC30170307	Chr19	29.4029	29.231	30.1538	7.67137	16.9295	Cis
17363828	Ermp1	endoplasmic reticulum metallopeptidase 1	226090	Chr19	-	29.6083	29.6482	backupUNC010568212	Chr1	72.275	70.4636	74.2146	7.65013	8.69262	Trans
17363954	Sgms1	sphingomyelin synthase 1	208449	Chr19	-	32.1234	32.3885	UNC30206821	Chr19	32.1442	31.0834	32.3975	7.79905	10.3481	Cis
17363997	Rnls	renalase, FAD-dependent amine oxidase	67795	Chr19	-	33.1378	33.3923	UNC30216360	Chr19	32.9575	32.5934	34.5355	7.8275	8.63797	Cis
17364126	Ifit1bl1	interferon induced protein with tetratricpeptide repeats 1B like 1	667373	Chr19	-	34.593	34.5994	JAX00476263	Chr19	34.6786	33.5873	36.7953	7.69814	11.609	Cis
17364208	Ppp1r3c	protein phosphatase 1, regulatory (inhibitor) subunit 3C	53412	Chr19	-	36.732	36.7367	UNC30256311	Chr19	36.0788	34.2173	36.6837	7.7819	16.2239	Cis
17364280	Myof	myoferlin	226101	Chr19	-	37.8991	38.0433	UNC30284006	Chr19	38.0591	37.859	38.1674	7.59001	8.76434	Cis
17364463	Cyp2c70	cytochrome P450, family 2, subfamily c, polypeptide 70	226105	Chr19	-	40.1535	40.1873	UNC30299581	Chr19	39.2298	38.1874	39.6771	7.63716	8.62203	Cis
17364820	Sfrp5	secreted frizzled-related sequence protein 5	54612	Chr19	-	42.198	42.2022	UNC30330531	Chr19	41.6237	40.5835	42.4454	7.52954	9.27493	Cis
17364988	Cpn1	carboxypeptidase N, polypeptide 1	93721	Chr19	-	43.9563	43.9866	UNC30365399	Chr19	44.0703	44.0373	44.1502	7.69854	27.9748	Cis
17365001	Cyp2c23	cytochrome P450, family 2, subfamily c, polypeptide 23	226143	Chr19	-	44.0052	44.0292	UNC30365399	Chr19	44.0703	44.0306	44.1502	7.80866	23.2488	Cis
17365014	Erlin1	ER lipid raft associated 1	226144	Chr19	-	44.0364	44.0697	UNC30365722	Chr19	44.0964	44.0306	44.1822	7.87106	14.1513	Cis
17365160	Mrpl43	mitochondrial ribosomal protein L43	94067	Chr19	-	45.0053	45.0064	UNC31349098	ChrX	135.323	135.079	137.013	8.5933	9.67572	Trans
17365369	Cuedc2	CUE domain containing 2	67116	Chr19	-	46.3298	46.3387	UNC20778368	Chr12	27.61	25.8687	28.0952	7.47839	7.49313	Trans
17365421	Nt5c2	5'-nucleotidase, cytosolic II	76952	Chr19	-	46.8873	47.0151	UNC30402027	Chr19	46.9176	46.6252	47.1015	7.69788	13.1344	Cis
17365493	Stn1	STN1, CST complex subunit	108689	Chr19	-	47.5012	47.5369	UNC30410944	Chr19	47.4339	47.1015	47.9919	7.77342	8.6256	Cis
17365803	Nrap	nebulin-related anchoring protein	18175	Chr19	-	56.3202	56.39	UNC30538585	Chr19	55.6617	55.1656	56.3867	7.7314	9.61976	Cis
17365848	Dclre1a	DNA cross-link repair 1A	55947	Chr19	-	56.5293	56.5477	UNC24653796	Chr14	104.048	103.687	104.895	7.7322	8.37172	Trans
17365863	Ccdc186	coiled-coil domain containing 186	213993	Chr19	-	56.7883	56.8222	UNC30557920	Chr19	57.0246	55.1879	57.0644	7.66647	8.01703	Cis
17365883	Afap1l2	actin filament associated protein 1-like 2	226250	Chr19	-	56.9133	57.0084	JAX00481071	Chr19	57.0077	56.6002	57.1768	7.88385	14.5497	Cis
17365911	Ablim1	actin-binding LIM protein 1	226251	Chr19	-	57.033	57.3148	UNC30561535	Chr19	57.2093	57.1426	57.5231	7.73862	12.1476	Cis
17365960	Gfra1	glial cell line derived neurotrophic factor family receptor alpha 1	14585	Chr19	-	58.2359	58.4556	UNC30577165	Chr19	58.3455	58.2626	58.3455	7.8242	29.6022	Cis
17366031	Vax1	ventral anterior homeobox 1	22326	Chr19	-	59.1662	59.1706	JAX00576597	Chr5	25.0488	23.7373	133.794	7.89104	8.05177	Trans
17366047	Emx2os	Emx2 opposite strand/antisense transcript (non-protein coding)	329078	Chr19	-	59.4251	59.4586	UNC30585694	Chr19	59.1324	58.8756	59.566	7.74094	9.25473	Cis
17366123	Sfxn4	sideroflexin 4	94281	Chr19	-	60.8375	60.8615	UNC30601828	Chr19	60.7922	60.4814	61.2535	8.16362	10.8998	Cis
17366511	Phyh	phytanoyl-CoA hydroxylase	16922	Chr2	+	4.91901	4.93839	JAX00482334	Chr2	4.93009	3.16425	5.88655	7.76544	9.87789	Cis
17367036	Pter	phosphotriesterase related	19212	Chr2	+	12.9241	13.0024	UNC28358066	Chr17	75.4798	75.2303	76.2773	7.85198	8.15799	Trans
17367047	Gm13270	predicted gene 13270	105244084	Chr2	+	13.2716	13.3248	UNC16572156	Chr9	69.3275	68.833	69.3275	8.3859	8.87941	Trans
17367367	Msrb2	methionine sulfoxide reductase B2	76467	Chr2	+	19.3714	19.3945	UNC2674890	Chr2	19.3693	19.0913	19.7641	7.87636	7.97016	Cis
17367367	Msrb2	methionine sulfoxide reductase B2	76467	Chr2	+	19.3714	19.3945	UNC28431935	Chr17	79.9543	79.505	79.9689	7.87636	8.83177	Trans
17367385	Otud1	OTU domain containing 1	71198	Chr2	+	19.6581	19.6604	UNC2676485	Chr2	19.4955	19.4478	20.5772	8.24603	9.27683	Cis
17367750	Dph7	diphthamine biosynethesis 7	67228	Chr2	+	24.9624	24.9734	UNC2757955	Chr2	25.5307	25.226	27.137	7.92305	8.55887	Cis
17367876	Tmem203	transmembrane protein 203	227615	Chr2	+	25.2554	25.2564	JAX00092279	Chr2	25.2849	23.9678	25.9473	7.61125	9.34572	Cis
17367978	Npdc1	neural proliferation, differentiation and control 1	18146	Chr2	+	25.4031	25.4095	UNC26298171	Chr16	8.0461	7.16766	8.56369	7.72728	7.77005	Trans
17368069	Clic3	chloride intracellular channel 3	69454	Chr2	+	25.4569	25.4587	JAX00092305	Chr2	25.626	25.0913	25.626	7.97741	18.3447	Cis
17368163	Obp2a	odorant binding protein 2A	227627	Chr2	+	25.7007	25.7032	UNC4401500	Chr2	164.286	163.549	164.335	8.38364	8.80429	Trans
17368569	Col5a1	collagen, type V, alpha 1	12831	Chr2	+	27.8868	28.0371	UNC2610958	Chr2	14.0064	13.7538	14.6549	7.67459	8.3347	Trans
17368646	Olfm1	olfactomedin 1	56177	Chr2	+	28.193	28.2303	JAX00486162	Chr2	28.3893	28.1817	28.6772	7.50769	21.4941	Cis
17368981	Gle1	GLE1 RNA export mediator (yeast)	74412	Chr2	+	29.9355	29.9589	UNC2809166	Chr2	29.581	28.7033	34.5522	7.79652	11.1272	Cis
17369252	Gm14487	predicted gene 14487	102633942	Chr2	+	30.5348	30.5389	UNC16840897	Chr9	89.7446	86.774	92.3947	7.89225	8.61306	Trans
17369487	Ass1	argininosuccinate synthetase 1	11898	Chr2	+	31.4703	31.5187	UNC2830612	Chr2	31.4539	30.8349	36.9901	8.1365	8.375	Cis
17370209	Gsn	gelsolin	227753	Chr2	+	35.2668	35.3078	JAX00486759	Chr2	32.9037	31.4539	35.279	7.75205	11.2929	Trans
17370309	Ptgs1	prostaglandin-endoperoxide synthase 1	19224	Chr2	+	36.2305	36.2512	UNC2897592	Chr2	38.6454	36.3321	40.7478	7.71619	8.4325	Trans
17370527	Kynu	kynureninase (L-kynurenine hydrolase)	70789	Chr2	+	43.5554	43.6825	UNC23212879	Chr13	100.079	99.9849	100.465	8.52755	9.28294	Trans
17370883	Kcnj3	potassium inwardly-rectifying channel, subfamily J, member 3	16519	Chr2	+	55.4361	55.598	UNC3114751	Chr2	56.7809	53.0716	57.0731	7.86798	10.6782	Cis
17370897	Gpd2	glycerol phosphate dehydrogenase 2, mitochondrial	14571	Chr2	+	57.2378	57.3701	JAX00308772	Chr11	40.4848	37.1615	44.1683	7.6027	7.82605	Trans
17370954	Upp2	uridine phosphorylase 2	76654	Chr2	+	58.5673	58.7925	UNC3144695	Chr2	59.3386	58.0311	60.988	7.7508	9.27632	Cis
17371201	Gca	grancalcin	227960	Chr2	+	62.6644	62.6926	UNC3187030	Chr2	62.8796	62.6895	63.9499	7.84313	10.2646	Cis
17371756	Metap1d	methionyl aminopeptidase type 1D (mitochondrial)	66559	Chr2	+	71.4533	71.5252	JAX00492676	Chr2	70.9986	70.0219	71.5856	7.93787	12.999	Cis
17371847	Pdk1	pyruvate dehydrogenase kinase, isoenzyme 1	228026	Chr2	+	71.8733	71.9022	UNC3276912	Chr2	69.4482	69.4482	70.0986	7.876	12.3429	Trans
17371941	Cdca7	cell division cycle associated 7	66953	Chr2	+	72.4762	72.4867	UNC3314528	Chr2	72.2253	71.1639	72.4276	7.6507	16.3754	Cis
17372009	Gm31264	predicted gene, 31264	102633437	Chr2	+	73.5849	73.5892	UNC3344845	Chr2	75.0565	72.8423	75.1329	7.63805	11.4792	Cis
17372035	Hoxd13	homeobox D13	15433	Chr2	+	74.6685	74.6714	UNC10395146	Chr5	147.294	147.249	147.704	7.86916	8.23145	Trans
17372153	E030042O20Rik	RIKEN cDNA E030042O20 gene	320474	Chr2	+	75.7049	75.71	UNC3353854	Chr2	75.7632	75.6946	76.0249	7.86511	18.092	Cis
17372197	Osbpl6	oxysterol binding protein-like 6	99031	Chr2	+	76.4074	76.5969	UNC3390481	Chr2	78.5628	76.1957	83.8804	8.85357	11.7954	Trans
17372392	Dnajc10	DnaJ heat shock protein family (Hsp40) member C10	66861	Chr2	+	80.3155	80.353	UNC3438983	Chr2	83.2525	80.0528	85.0376	7.74051	19.7724	Trans
17372515	Itgav	integrin alpha V	16410	Chr2	+	83.7245	83.8067	JAX00096909	Chr2	87.3446	79.2352	88.3387	7.59557	11.053	Trans
17372644	Slc43a3	solute carrier family 43, member 3	58207	Chr2	+	84.9366	84.9584	UNC19515026	Chr11	43.9316	42.1662	44.1683	7.91207	7.93538	Trans
17372792	Olfr1033	olfactory receptor 1033	258571	Chr2	+	86.0348	86.0446	UNC3380410	Chr2	77.7592	75.2421	87.1351	7.8894	9.15842	Trans
17372931	Olfr1212	olfactory receptor 1212	258241	Chr2	+	88.9586	88.9593	backupUNC100125042	Chr10	107.991	105.694	108.855	8.89232	9.45107	Trans
17372942	Olfr1258	olfactory receptor 1258	258980	Chr2	+	89.9273	89.9302	UNC16097569	Chr9	31.3857	30.0746	31.6214	7.74913	8.56822	Trans
17373144	Rapsn	receptor-associated protein of the synapse	19400	Chr2	+	91.0357	91.0457	UNC3444922	Chr2	83.8129	78.593	87.9207	7.83124	10.5504	Trans
17373189	Mybpc3	myosin binding protein C, cardiac	17868	Chr2	+	91.1194	91.1365	UNC3507757	Chr2	90.7886	87.3976	91.6018	7.68928	18.6698	Cis
17373406	Harbi1	harbinger transposase derived 1	241547	Chr2	+	91.711	91.7212	UNC145132	Chr1	14.2615	6.74744	25.2349	7.65872	7.72874	Trans
17373572	Gm10804	predicted gene 10804	100038525	Chr2	+	93.4529	93.4697	UNC3529092	Chr2	92.9352	92.7551	93.3901	7.85247	32.6515	Cis
17373696	Slc1a2	solute carrier family 1 (glial high affinity glutamate transporter), member 2	20511	Chr2	+	102.659	102.784	UNC3666079	Chr2	103.254	102.287	112.835	7.51955	11.5707	Cis
17373817	Cd59b	CD59b antigen	333883	Chr2	+	104.071	104.085	UNC3678010	Chr2	104.217	103.594	106.773	7.63706	8.24816	Cis
17373825	Cd59a	CD59a antigen	12509	Chr2	+	104.096	104.115	UNC3676895	Chr2	104.161	101.845	104.346	7.51577	13.9126	Cis
17373930	Them7	thioesterase superfamily member 7	74088	Chr2	+	105.224	105.379	JAX00498561	Chr2	104.434	102.823	106.201	12.102	12.8405	Cis
17373996	BC048594	cDNA sequence BC048594	100038656	Chr2	+	106.003	106.041	UNC3698216	Chr2	106.006	105.209	106.201	7.64883	22.3365	Cis
17374332	Fmn1	formin 1	14260	Chr2	+	113.328	113.711	JAX00098785	Chr2	112.992	107.322	113.607	7.69355	8.73713	Cis
17374648	Ivd	isovaleryl coenzyme A dehydrogenase	56357	Chr2	+	118.862	118.883	UNC21192314	Chr12	58.7139	56.8402	65.0081	7.81165	7.94907	Trans
17374686	Rpusd2	RNA pseudouridylate synthase domain containing 2	271842	Chr2	+	119.035	119.042	UNC4826222	Chr3	20.3058	18.4764	20.4106	7.83226	10.1631	Trans
17374850	Rtf1	RTF1, Paf1/RNA polymerase II complex component	76246	Chr2	+	119.675	119.734	UNC3836446	Chr2	118.862	118.846	119.91	7.71461	13.2424	Cis
17374972	Jmjd7	jumonji domain containing 7	433466	Chr2	+	120.028	120.033	UNC3860643	Chr2	121.552	118.993	122.33	8.00985	31.6296	Cis
17374984	Pla2g4b	phospholipase A2, group IVB (cytosolic)	211429	Chr2	+	120.033	120.042	UNC3858704	Chr2	121.27	118.846	122.723	7.68588	11.7837	Cis
17375185	Ccndbp1	cyclin D-type binding-protein 1	17151	Chr2	+	121.008	121.017	UNC3857907	Chr2	121.127	118.949	121.592	7.63186	9.59704	Cis
17375185	Ccndbp1	cyclin D-type binding-protein 1	17151	Chr2	+	121.008	121.017	UNC31549745	ChrX	164.138	162.792	164.638	7.63186	9.17352	Trans
17375396	Sord	sorbitol dehydrogenase	20322	Chr2	+	122.235	122.264	UNC3894142	Chr2	124.414	120.317	144.773	7.83689	7.98994	Trans
17375538	Sqor	sulfide quinone oxidoreductase	59010	Chr2	+	122.765	122.81	UNC3881386	Chr2	123.394	122.292	124.089	7.46671	12.3339	Cis
17375590	Slc24a5	solute carrier family 24, member 5	317750	Chr2	+	125.068	125.089	UNC3895320	Chr2	124.513	121.655	125.468	8.37682	13.0587	Cis
17375685	Fgf7	fibroblast growth factor 7	14178	Chr2	+	126.035	126.091	UNC3923087	Chr2	126.899	125.621	127.842	7.82935	9.4411	Cis
17376167	Sirpa	signal-regulatory protein alpha	19261	Chr2	+	129.593	129.631	UNC3973320	Chr2	131.063	129.499	131.435	7.71872	9.18667	Cis
17376599	AU019990	expressed sequence AU019990	767814	Chr2	+	132.598	132.653	UNC16904504	Chr9	94.6036	92.3861	94.9078	7.86468	8.93122	Trans
17376917	Ndufaf5	NADH dehydrogenase (ubiquinone) complex I, assembly factor 5	69487	Chr2	+	140.171	140.204	UNC4083925	Chr2	139.894	138.419	140.404	7.79195	15.8366	Cis
17377092	Sec23b	SEC23 homolog B, COPII coat complex component	27054	Chr2	+	144.556	144.59	UNC4148224	Chr2	144.688	144.315	146.43	7.79533	8.71713	Cis
17377177	Rin2	Ras and Rab interactor 2	74030	Chr2	+	145.785	145.886	UNC4168030	Chr2	146.533	144.751	146.727	7.92963	11.7754	Cis
17377448	Zfp937	zinc finger protein 937	245174	Chr2	+	150.24	150.245	JAX00507163	Chr2	150.491	150.207	150.659	8.05407	12.3734	Cis
17377475	E130215H24Rik	RIKEN cDNA E130215H24 gene	109344	Chr2	+	150.668	150.669	UNC1562414	Chr1	122.388	116.681	127.46	7.85075	8.9212	Trans
17377651	Slc52a3	solute carrier protein family 52, member 3	69698	Chr2	+	151.997	152.009	UNC4222949	Chr2	150.387	148.73	151.925	7.73037	8.23781	Cis
17377728	Defb28	defensin beta 28	545475	Chr2	+	152.518	152.521	UNC4245309	Chr2	152.698	152.642	153.362	7.7984	11.1546	Cis
17377734	Defb21	defensin beta 21	403172	Chr2	+	152.573	152.575	UNC6397827	Chr3	141.194	31.238	141.579	7.89651	8.65628	Trans
17377793	Tpx2	TPX2, microtubule-associated	72119	Chr2	+	152.848	152.894	UNC4023187	Chr2	134.932	133.648	135.714	8.19133	8.33153	Trans
17378035	Bpifb6	BPI fold containing family B, member 6	228796	Chr2	+	153.902	153.913	UNC7853515	Chr4	101.58	101.136	102.741	8.05405	8.88641	Trans
17378272	Raly	hnRNP-associated with lethal yellow	19383	Chr2	+	154.791	154.867	UNC4275170	Chr2	155.16	154.007	156.743	8.02463	9.86473	Cis
17378287	a	nonagouti	50518	Chr2	+	154.951	155.051	backupUNC040924127	Chr4	22.2525	20.5108	24.5964	7.90451	7.99303	Trans
17378440	Procr	protein C receptor, endothelial	19124	Chr2	+	155.751	155.755	UNC4267745	Chr2	154.525	153.721	155.235	7.68574	8.58254	Cis
17378450	Mmp24	matrix metallopeptidase 24	17391	Chr2	+	155.793	155.818	UNC11923091	Chr6	116.865	115.576	117.558	7.86074	8.12181	Trans
17378692	Rpn2	ribophorin II	20014	Chr2	+	157.279	157.326	UNC4342448	Chr2	160.181	157.064	160.417	8.54634	13.7222	Trans
17378848	Snhg11	small nucleolar RNA host gene 11	319317	Chr2	+	158.376	158.382	UNC4298342	Chr2	157.169	157.122	157.223	7.83891	20.6785	Cis
17378929	Actr5	ARP5 actin-related protein 5	109275	Chr2	+	158.625	158.639	UNC29610622	Chr18	74.9014	73.9693	75.5323	7.71633	8.46368	Trans
17379123	LOC102639013	uncharacterized LOC102639013	102639013	Chr2	+	162.679	162.681	UNC23905346	Chr14	39.3435	37.5124	46.1001	7.73798	8.5053	Trans
17379206	Mybl2	myeloblastosis oncogene-like 2	17865	Chr2	+	163.055	163.084	UNC14598482	Chr8	42.1912	37.4718	45.2223	7.72032	7.91816	Trans
17379304	Pkig	protein kinase inhibitor, gamma	18769	Chr2	+	163.658	163.726	UNC4390318	Chr2	163.519	162.769	163.774	7.85918	11.4132	Cis
17379401	Rbpjl	recombination signal binding protein for immunoglobulin kappa J region-like	19668	Chr2	+	164.403	164.415	JAX00622018	Chr6	110.426	107.48	110.663	7.81232	7.89399	Trans
17379460	Wfdc2	WAP four-disulfide core domain 2	67701	Chr2	+	164.562	164.568	UNC4401500	Chr2	164.286	163.697	165.558	7.77448	12.7578	Cis
17379683	Slc2a10	solute carrier family 2 (facilitated glucose transporter), member 10	170441	Chr2	+	165.504	165.519	UNC807288	Chr1	64.3241	62.9175	66.2017	8.10245	8.74968	Trans
17379889	Slc9a8	solute carrier family 9 (sodium/hydrogen exchanger), member 8	77031	Chr2	+	167.424	167.476	UNC4437868	Chr2	166.681	164.335	168.267	7.65235	8.25148	Cis
17379933	Gm14320	predicted gene 14320	102634323	Chr2	+	167.662	167.668	UNC10064712	Chr5	123.094	121.585	125.81	7.7272	8.04615	Trans
17379933	Gm14320	predicted gene 14320	102634323	Chr2	+	167.662	167.668	JAX00565177	Chr4	126.116	125.887	126.146	7.7272	8.08223	Trans
17379960	Ptpn1	protein tyrosine phosphatase, non-receptor type 1	19246	Chr2	+	167.932	167.978	UNC4794268	Chr3	18.1076	11.1193	19.1275	7.81363	8.61142	Trans
17380555	Gm14403	predicted gene 14403	433520	Chr2	+	177.502	177.511	UNC4561235	Chr2	175.178	175.178	175.178	7.76566	17.5561	Trans
17380567	Gm14322	predicted gene 14322	626802	Chr2	+	177.771	177.773	JAX00103339	Chr2	173.937	173.816	180.547	7.70873	8.99904	Trans
17380637	Cdh4	cadherin 4	12561	Chr2	+	179.444	179.899	UNC4581992	Chr2	179.369	179.249	179.647	7.84617	9.68945	Cis
17380840	Gid8	GID complex subunit 8	76425	Chr2	+	180.71	180.719	UNC4598331	Chr2	180.657	180.57	180.865	8.01467	26.3334	Cis
17380915	Col20a1	collagen, type XX, alpha 1	73368	Chr2	+	180.987	181.017	UNC4599374	Chr2	180.786	180.57	180.998	7.87532	11.4997	Cis
17381078	Uckl1os	uridine-cytidine kinase 1-like 1, opposite strand	100271841	Chr2	+	181.58	181.582	UNC20836691	Chr12	31.5053	30.3746	33.9154	7.79536	8.64936	Trans
17381306	Mcm10	minichromosome maintenance 10 replication initiation factor	70024	Chr2	-	4.99052	5.01278	UNC2501218	Chr2	5.67133	4.98651	8.56399	7.71804	7.81661	Cis
17381306	Mcm10	minichromosome maintenance 10 replication initiation factor	70024	Chr2	-	4.99052	5.01278	UNC2310499	Chr1	180.547	163.438	182.806	7.71804	8.0916	Trans
17381424	Dhtkd1	dehydrogenase E1 and transketolase domain containing 1	209692	Chr2	-	5.89672	5.94261	UNC2501218	Chr2	5.67133	5.10979	6.30911	7.67614	16.5195	Cis
17381468	Gm13383	predicted gene 13383	102632086	Chr2	-	6.25597	6.25724	JAX00695285	Chr9	58.5282	54.198	59.3782	7.71532	7.75345	Trans
17381589	Itih2	inter-alpha trypsin inhibitor, heavy chain 2	16425	Chr2	-	10.0947	10.1314	UNC2547203	Chr2	9.41468	9.41468	10.1937	8.47546	12.8534	Cis
17381589	Itih2	inter-alpha trypsin inhibitor, heavy chain 2	16425	Chr2	-	10.0947	10.1314	UNC21766232	Chr12	102.315	101.793	102.617	8.47546	9.337	Trans
17381752	Mindy3	MINDY lysine 48 deubiquitinase 3	66960	Chr2	-	12.3478	12.4194	UNC2595969	Chr2	12.849	11.9219	13.0571	7.87593	11.0661	Cis
17381879	St8sia6	ST8 alpha-N-acetyl-neuraminide alpha-2,8-sialyltransferase 6	241230	Chr2	-	13.6517	13.7938	UNC2621589	Chr2	14.8286	14.6549	14.8286	8.896	11.4972	Cis
17382214	Tbpl2	TATA box binding protein like 2	227606	Chr2	-	24.0718	24.0966	UNC24723835	Chr14	109.481	108.229	116.155	8.02958	8.80242	Trans
17382533	Dpp7	dipeptidylpeptidase 7	83768	Chr2	-	25.3523	25.3563	JAX00092305	Chr2	25.626	25.0913	25.799	7.93302	10.8409	Cis
17382592	Ptgds	prostaglandin D2 synthase (brain)	19215	Chr2	-	25.4667	25.4698	JAX00092305	Chr2	25.626	24.9051	25.7135	7.83964	13.512	Cis
17382914	Dnlz	DNL-type zinc finger	52838	Chr2	-	26.3483	26.3521	UNC2769757	Chr2	26.5535	26.3318	27.1806	7.74423	14.2811	Cis
17383254	Sardh	sarcosine dehydrogenase	192166	Chr2	-	27.1887	27.2474	UNC2774682	Chr2	26.9618	26.2966	27.8669	7.64887	16.6022	Cis
17383395	Gtf3c5	general transcription factor IIIC, polypeptide 5	70239	Chr2	-	28.5666	28.5837	UNC24515948	Chr14	94.0232	93.3626	94.4375	7.65879	8.94305	Trans
17383835	Uck1	uridine-cytidine kinase 1	22245	Chr2	-	32.2559	32.2602	UNC2837930	Chr2	32.3775	31.4221	39.2537	8.27612	10.6952	Cis
17383886	1110008P14Rik	RIKEN cDNA 1110008P14 gene	73737	Chr2	-	32.3778	32.3818	UNC2559552	Chr2	10.2527	8.76844	10.3667	7.60374	8.8331	Trans
17384082	Slc2a8	solute carrier family 2, (facilitated glucose transporter), member 8	56017	Chr2	-	32.973	32.9821	UNC2842985	Chr2	32.9106	31.5575	34.7524	7.74648	9.82941	Cis
17384657	Mir5128	microRNA 5128	100628597	Chr2	-	37.6882	37.6883	UNC020019348	Chr2	36.4539	35.4416	38.5154	7.72041	10.4664	Cis
17385455	Ccdc148	coiled-coil domain containing 148	227933	Chr2	-	58.8227	59.1607	UNC3144266	Chr2	59.2895	58.0311	59.3386	7.74129	13.8397	Cis
17385797	Ifih1	interferon induced with helicase C domain 1	71586	Chr2	-	62.597	62.6461	UNC3182386	Chr2	62.49	61.0794	62.6491	7.84342	15.0004	Cis
17386090	Scn7a	sodium channel, voltage-gated, type VII, alpha	20272	Chr2	-	66.6741	66.7848	UNC3237906	Chr2	66.8534	65.1748	68.7149	7.83778	10.5658	Cis
17386347	Tlk1	tousled-like kinase 1	228012	Chr2	-	70.7165	70.8257	UNC3303279	Chr2	71.4245	71.0229	71.54	7.55083	15.3032	Cis
17386377	Mettl8	methyltransferase like 8	228019	Chr2	-	70.9647	71.0556	UNC3296188	Chr2	70.9199	70.9164	71.6055	7.85733	16.5724	Cis
17386499	Cir1	corepressor interacting with RBPJ, 1	66935	Chr2	-	73.2837	73.3126	UNC3322185	Chr2	72.8423	72.7383	74.3195	7.73263	9.6398	Cis
17386633	4930441J16Rik	RIKEN cDNA 4930441J16 gene	73962	Chr2	-	74.299	74.3077	UNC2988855	Chr2	47.2729	46.701	48.7517	8.21992	8.51555	Trans
17386725	Pde11a	phosphodiesterase 11A	241489	Chr2	-	75.9911	76.3387	UNC3363137	Chr2	76.3816	76.0869	76.5554	7.6458	12.759	Cis
17386778	Ttn	titin	22138	Chr2	-	76.705	76.9825	UNC270452	Chr1	22.8438	16.96	24.3354	7.33298	9.54919	Trans
17387184	Zfp385b	zinc finger protein 385B	241494	Chr2	-	77.4109	77.8196	UNC3417443	Chr2	80.7846	72.8423	83.6477	7.70627	8.02333	Trans
17387210	Cwc22	CWC22 spliceosome-associated protein	80744	Chr2	-	77.8798	77.9462	UNC020416650	Chr2	81.3336	81.301	83.8129	7.61174	46.4043	Trans
17387276	Pde1a	phosphodiesterase 1A, calmodulin-dependent	18573	Chr2	-	79.8364	80.1294	UNC3412650	Chr2	80.3399	79.7717	83.8336	8.13285	17.1953	Cis
17387305	Frzb	frizzled-related protein	20378	Chr2	-	80.4131	80.4476	UNC021280259	Chr2	83.201	78.8559	83.8804	7.65746	18.6366	Trans
17387407	Tfpi	tissue factor pathway inhibitor	21788	Chr2	-	84.433	84.4767	UNC8816858	Chr5	24.8417	24.3554	26.5412	7.61479	8.32561	Trans
17387407	Tfpi	tissue factor pathway inhibitor	21788	Chr2	-	84.433	84.4767	UNC3390985	Chr2	78.593	77.9918	84.8417	7.61479	16.0711	Trans
17387768	Olfr1135	olfactory receptor 1135	258654	Chr2	-	87.6715	87.6721	backupUNC020550169	Chr2	163.823	163.179	163.898	8.2973	8.84342	Trans
17387928	Olfr1231	olfactory receptor 1231	258446	Chr2	-	89.3027	89.3036	JAX00127710	Chr5	21.1486	20.749	21.1486	7.82016	9.06046	Trans
17388016	Olfr1269	olfactory receptor 1269	258339	Chr2	-	90.1186	90.1187	JAX00275319	Chr1	168.595	168.392	170.594	7.63765	10.6912	Trans
17388435	Tspan18	tetraspanin 18	241556	Chr2	-	93.2028	93.3344	UNC3525203	Chr2	92.6894	92.1156	93.5041	7.92417	13.1422	Cis
17388454	Cd82	CD82 antigen	12521	Chr2	-	93.4192	93.4631	UNC3536464	Chr2	93.4475	92.5661	93.5893	7.80853	20.0064	Cis
17388573	Hsd17b12	hydroxysteroid (17-beta) dehydrogenase 12	56348	Chr2	-	94.0328	94.1579	UNC020117511	Chr2	98.7145	93.4694	101.968	7.70281	7.99018	Trans
17388667	B230118H07Rik	RIKEN cDNA B230118H07 gene	68170	Chr2	-	101.561	101.629	UNC3630022	Chr2	100.539	99.2614	102.404	7.78156	15.1479	Cis
17388687	Prr5l	proline rich 5 like	72446	Chr2	-	101.715	101.883	UNC3630022	Chr2	100.539	98.6183	101.778	7.78358	8.34551	Cis
17388725	Fjx1	four jointed box 1	14221	Chr2	-	102.45	102.451	UNC3656746	Chr2	102.546	102.2	102.581	7.69271	14.8391	Cis
17388854	Caprin1	cell cycle associated protein 1	53872	Chr2	-	103.766	103.798	backupUNC020481462	Chr2	109.524	103.359	112.144	8.00235	8.21937	Trans
17388999	Prrg4	proline rich Gla (G-carboxyglutamic acid) 4 (transmembrane)	228413	Chr2	-	104.831	104.85	UNC3697501	Chr2	105.923	104.42	106.725	7.69993	11.9545	Cis
17389144	Bbox1	butyrobetaine (gamma), 2-oxoglutarate dioxygenase 1 (gamma-butyrobetaine hydroxylase)	170442	Chr2	-	110.264	110.315	UNC020481964	Chr2	110.013	109.72	112.229	7.68324	9.01926	Cis
17389472	Scg5	secretogranin V	20394	Chr2	-	113.776	113.829	JAX00098858	Chr2	114.095	113.607	115.783	7.60128	11.3409	Cis
17389481	Arhgap11a	Rho GTPase activating protein 11A	228482	Chr2	-	113.831	113.849	UNC3780649	Chr2	114.073	111.828	114.1	7.71495	12.4864	Cis
17389571	Zfp770	zinc finger protein 770	228491	Chr2	-	114.194	114.201	UNC29116301	Chr18	41.7339	39.293	46.3382	7.69445	7.81305	Trans
17389635	Meis2	Meis homeobox 2	17536	Chr2	-	116.066	116.067	UNC020140262	Chr2	114.797	114.628	116.239	7.72419	7.7754	Cis
17389901	Exd1	exonuclease 3'-5' domain containing 1	241624	Chr2	-	119.517	119.547	UNC3833893	Chr2	118.613	118.493	122.229	7.81168	12.7487	Cis
17390394	Tgm5	transglutaminase 5	74176	Chr2	-	121.046	121.086	UNC29596357	Chr18	74.0211	73.9935	74.4528	7.66721	7.88952	Trans
17391056	Atp8b4	ATPase, class I, type 8B, member 4	241633	Chr2	-	126.323	126.5	UNC3930347	Chr2	127.485	125.212	140.256	7.69022	9.72831	Cis
17391094	Hdc	histidine decarboxylase	15186	Chr2	-	126.594	126.619	UNC3915705	Chr2	126.173	125.31	126.827	7.63438	8.55287	Cis
17391193	Sppl2a	signal peptide peptidase like 2A	66552	Chr2	-	126.891	126.933	UNC3922534	Chr2	126.827	125.31	127.73	10.1402	10.8033	Cis
17391212	Ncaph	non-SMC condensin I complex, subunit H	215387	Chr2	-	127.104	127.134	UNC4048999	Chr2	136.881	135.901	139.611	7.93763	10.1947	Trans
17391339	Mall	mal, T cell differentiation protein-like	228576	Chr2	-	127.704	127.73	UNC3924665	Chr2	127.018	126.764	129.081	7.60308	10.3723	Cis
17391373	1500011K16Rik	RIKEN cDNA 1500011K16 gene	67885	Chr2	-	127.791	127.792	UNC2766637	Chr2	26.2156	25.6625	123.47	7.83065	7.8754	Trans
17391490	Zc3h8	zinc finger CCCH type containing 8	57432	Chr2	-	128.927	128.944	UNC11105445	Chr6	53.9187	52.0881	54.0573	7.82465	8.78173	Trans
17391518	Gm14025	predicted gene 14025	668894	Chr2	-	129.06	129.066	UNC3948969	Chr2	129.007	126.445	131.084	7.68351	8.34605	Cis
17391598	Snrpb	small nuclear ribonucleoprotein B	20638	Chr2	-	130.172	130.179	UNC2603382	Chr2	13.3945	13.128	13.7206	7.7132	8.22186	Trans
17391608	Idh3b	isocitrate dehydrogenase 3 (NAD+) beta	170718	Chr2	-	130.279	130.285	UNC23361128	Chr13	110.62	110.608	110.705	8.67897	9.36586	Trans
17391670	Ubox5	U box domain containing 5	140629	Chr2	-	130.59	130.63	backupUNC020192565	Chr2	129.608	129.558	131.601	7.67288	9.30787	Cis
17391784	A730017L22Rik	RIKEN cDNA A730017L22 gene	613258	Chr2	-	130.874	130.906	UNC3955453	Chr2	129.539	129.364	131.168	7.79122	17.5669	Cis
17391963	Tmem230	transmembrane protein 230	70612	Chr2	-	132.24	132.248	UNC3980085	Chr2	131.708	129.326	133.955	7.85583	11.1795	Cis
17392056	Fermt1	fermitin family member 1	241639	Chr2	-	132.905	132.946	UNC3943914	Chr2	128.581	125.621	133.926	7.85147	9.2371	Trans
17392087	Tmx4	thioredoxin-related transmembrane protein 4	52837	Chr2	-	134.594	134.644	UNC8921483	Chr5	33.2784	32.4152	36.2534	7.60366	8.56733	Trans
17392279	Kif16b	kinesin family member 16B	16558	Chr2	-	142.618	142.902	UNC020499256	Chr2	142.037	137.934	144.06	8.20476	9.11605	Cis
17392333	Rrbp1	ribosome binding protein 1	81910	Chr2	-	143.948	144.011	UNC4142127	Chr2	144.226	137.934	146.283	7.72985	10.2473	Cis
17392452	Crnkl1	crooked neck pre-mRNA splicing factor 1	66877	Chr2	-	145.918	145.935	UNC020215912	Chr2	144.866	140.668	146.142	7.88022	8.06438	Cis
17392561	Foxa2	forkhead box A2	15376	Chr2	-	148.043	148.047	UNC26861391	Chr16	54.5736	53.3672	56.109	7.70433	7.76639	Trans
17392609	Cst3	cystatin C	13010	Chr2	-	148.872	148.876	JAX00101452	Chr2	148.697	148.588	149.426	7.61902	15.9882	Cis
17392832	Snph	syntaphilin	241727	Chr2	-	151.591	151.633	JAX00507454	Chr2	151.944	150.945	153.647	7.92442	8.13324	Cis
17392868	Psmf1	proteasome (prosome, macropain) inhibitor subunit 1	228769	Chr2	-	151.716	151.744	JAX00507203	Chr2	150.739	150.739	152.614	7.59182	19.9442	Cis
17392925	Trib3	tribbles pseudokinase 3	228775	Chr2	-	152.338	152.344	UNC28219956	Chr17	66.9261	66.217	67.1346	7.81695	7.98303	Trans
17392932	Nrsn2	neurensin 2	228777	Chr2	-	152.369	152.377	UNC16569972	Chr9	69.1504	68.7396	69.3275	8.37355	8.58132	Trans
17392956	Defb26	defensin beta 26	654457	Chr2	-	152.508	152.512	UNC12215650	Chr6	139.104	138.798	139.216	7.65624	10.1453	Trans
17392956	Defb26	defensin beta 26	654457	Chr2	-	152.508	152.512	UNC4243676	Chr2	152.558	152.512	152.614	7.65624	35.786	Cis
17392959	Defb29	defensin beta 29	75400	Chr2	-	152.539	152.54	UNC4243122	Chr2	152.512	150.818	153.808	9.05394	9.97231	Cis
17393008	Dusp15	dual specificity phosphatase-like 15	252864	Chr2	-	152.942	152.951	UNC4244319	Chr2	152.614	149.876	153.409	7.89021	12.3218	Cis
17393022	Pdrg1	p53 and DNA damage regulated 1	68559	Chr2	-	153.009	153.015	UNC4252326	Chr2	153.315	152.698	153.551	7.64039	11.6985	Cis
17393160	E2f1	E2F transcription factor 1	13555	Chr2	-	154.559	154.57	UNC4275170	Chr2	155.16	151.895	156.69	7.75826	8.40783	Cis
17393187	Gm14216	predicted gene 14216	102635751	Chr2	-	154.722	154.738	UNC4287327	Chr2	156.234	152.642	156.879	7.80986	8.48854	Cis
17393207	Ahcy	S-adenosylhomocysteine hydrolase	269378	Chr2	-	155.059	155.074	UNC4275170	Chr2	155.16	153.897	158.301	7.75236	8.50967	Cis
17393483	Nfs1	nitrogen fixation gene 1 (S. cerevisiae)	18041	Chr2	-	156.124	156.144	UNC4288890	Chr2	156.397	155.197	156.743	9.31264	11.8673	Cis
17393592	Ndrg3	N-myc downstream regulated gene 3	29812	Chr2	-	156.927	156.992	UNC4297878	Chr2	157.122	156.808	159.155	7.9673	14.5182	Cis
17393789	Tgm2	transglutaminase 2, C polypeptide	21817	Chr2	-	158.116	158.146	UNC17815844	Chr10	40.9096	39.3217	47.7046	7.78707	7.83506	Trans
17393789	Tgm2	transglutaminase 2, C polypeptide	21817	Chr2	-	158.116	158.146	UNC4312479	Chr2	158.325	156.976	158.61	7.78707	16.3897	Cis
17393825	Snhg17	small nucleolar RNA host gene 17	68108	Chr2	-	158.354	158.362	JAX00509008	Chr2	159.113	157.223	159.193	7.66605	8.18353	Cis
17394008	Gtsf1l	gametocyte specific factor 1-like	68236	Chr2	-	163.087	163.088	UNC15751443	Chr8	129.029	126.798	129.185	7.73946	9.17901	Trans
17394041	Hnf4aos	hepatic nuclear factor 4 alpha, opposite strand	68314	Chr2	-	163.494	163.542	UNC4401500	Chr2	164.286	163.651	165.18	11.071	11.7519	Cis
17394047	Serinc3	serine incorporator 3	26943	Chr2	-	163.624	163.645	UNC4384936	Chr2	163.179	162.693	164.286	7.73593	12.051	Cis
17394060	LOC102639518	uncharacterized LOC102639518	102639518	Chr2	-	163.685	163.692	UNC4390659	Chr2	163.588	163.519	163.697	7.77945	29.5024	Cis
17394063	Ada	adenosine deaminase	11486	Chr2	-	163.727	163.75	UNC4391797	Chr2	163.651	163.179	163.855	7.89892	8.25385	Cis
17394225	Wfdc16	WAP four-disulfide core domain 16	277345	Chr2	-	164.635	164.639	UNC4408194	Chr2	164.731	164.366	165.224	7.59607	11.5042	Cis
17394275	Acot8	acyl-CoA thioesterase 8	170789	Chr2	-	164.793	164.805	UNC4816788	Chr3	19.6967	17.831	20.9802	7.70497	8.50912	Trans
17394275	Acot8	acyl-CoA thioesterase 8	170789	Chr2	-	164.793	164.805	backupUNC020550169	Chr2	163.823	162.636	165.712	7.70497	11.964	Cis
17394297	Pltp	phospholipid transfer protein	18830	Chr2	-	164.84	164.858	UNC23184134	Chr13	98.2545	97.7924	98.2545	9.33793	9.43132	Trans
17394478	Trp53rka	transformation related protein 53 regulating kinase A	381406	Chr2	-	165.49	165.492	UNC4433704	Chr2	166.452	164.366	166.716	7.82042	8.96425	Cis
17394538	Sulf2	sulfatase 2	72043	Chr2	-	166.073	166.156	UNC15259590	Chr8	92.7782	86.2286	93.6597	7.65521	8.73169	Trans
17394538	Sulf2	sulfatase 2	72043	Chr2	-	166.073	166.156	JAX00510600	Chr2	165.7	164.423	166.562	7.65521	11.6797	Cis
17394631	Stau1	staufen double-stranded RNA binding protein 1	20853	Chr2	-	166.948	166.996	UNC4439353	Chr2	166.79	166.749	167.443	7.77651	8.57275	Cis
17394806	Nfatc2	nuclear factor of activated T cells, cytoplasmic, calcineurin dependent 2	18019	Chr2	-	168.479	168.602	UNC4467163	Chr2	169.048	167.689	169.301	7.69721	10.2473	Cis
17394829	Atp9a	ATPase, class II, type 9A	11981	Chr2	-	168.635	168.742	UNC4459529	Chr2	168.598	168.328	168.831	8.24364	9.42393	Cis
17395063	Ctcfl	CCCTC-binding factor (zinc finger protein)-like	664799	Chr2	-	173.094	173.119	UNC4535902	Chr2	173.089	172.622	173.204	7.88071	13.6713	Cis
17395170	Prelid3b	PRELI domain containing 3B	66390	Chr2	-	174.465	174.473	UNC4553907	Chr2	174.417	174.019	174.825	7.79797	10.0871	Cis
17395238	Gm14391	predicted gene 14391	665001	Chr2	-	175.191	175.191	UNC4561235	Chr2	175.178	175.178	175.178	7.66603	32.9483	Cis
17395359	Gm14296	predicted gene 14296	102639598	Chr2	-	176.915	176.916	UNC17784261	Chr10	38.5889	34.4834	40.6321	7.86735	7.87841	Trans
17395359	Gm14296	predicted gene 14296	102639598	Chr2	-	176.915	176.916	UNC4561235	Chr2	175.178	175.178	178.297	7.86735	17.2868	Cis
17395499	Hrh3	histamine receptor H3	99296	Chr2	-	180.099	180.104	UNC4590003	Chr2	179.937	179.369	180.39	7.67865	8.29304	Cis
17395658	Dido1	death inducer-obliterator 1	23856	Chr2	-	180.658	180.71	UNC4597727	Chr2	180.57	180.57	180.877	8.05062	22.0196	Cis
17396020	LOC102634900	uncharacterized LOC102634900	102634900	Chr3	+	7.61271	7.68993	JAX00104305	Chr3	10.688	3.16389	10.7558	8.0268	10.68	Trans
17396056	Fabp5	fatty acid binding protein 5, epidermal	16592	Chr3	+	10.0125	10.0166	JAX00353763	Chr13	30.1829	28.0945	30.817	8.43923	8.67123	Trans
17396069	Chmp4c	charged multivesicular body protein 4C	66371	Chr3	+	10.3669	10.3906	JAX00514851	Chr3	10.1974	3.16389	13.7246	7.77128	11.174	Cis
17396078	Ralyl	RALY RNA binding protein-like	76897	Chr3	+	13.4718	14.1821	JAX00514966	Chr3	10.8883	10.748	16.2672	7.81678	12.9782	Trans
17396093	Gm6300	solute carrier family 7 (cationic amino acid transporter, y+ system), member pseudogene	622229	Chr3	+	14.3635	14.3773	JAX00104631	Chr3	15.0219	11.1193	15.208	7.91114	9.24148	Cis
17396093	Gm6300	solute carrier family 7 (cationic amino acid transporter, y+ system), member pseudogene	622229	Chr3	+	14.3635	14.3773	UNC14358637	Chr8	26.7513	25.5335	27.2253	7.91114	7.97295	Trans
17396143	Car13	carbonic anhydrase 13	71934	Chr3	+	14.6418	14.6629	UNC4718302	Chr3	12.0779	10.8883	17.0644	7.71711	9.77453	Trans
17396205	Mtfr1	mitochondrial fission regulator 1	67472	Chr3	+	19.1873	19.2195	UNC4825271	Chr3	20.2454	15.0119	21.0866	7.72052	8.3943	Cis
17396251	4632415L05Rik	RRS1 ribosome biogenesis regulator homolog pseudogene	70808	Chr3	+	19.8949	19.8976	UNC4825271	Chr3	20.2454	19.7462	22.4378	7.76844	12.8528	Cis
17396260	Cp	ceruloplasmin	12870	Chr3	+	19.9572	20.0086	UNC26185136	Chr15	97.405	96.7534	97.4395	7.62891	9.04836	Trans
17396383	Tnfsf10	tumor necrosis factor (ligand) superfamily, member 10	22035	Chr3	+	27.317	27.3422	UNC4907342	Chr3	26.5887	25.6153	27.9075	7.65297	9.12506	Cis
17396403	Pld1	phospholipase D1	18805	Chr3	+	27.9501	28.1315	UNC4923256	Chr3	27.9526	25.6153	28.3809	7.926	11.2772	Cis
17396492	Eif5a2	eukaryotic translation initiation factor 5A2	208691	Chr3	+	28.7821	28.7984	UNC4935378	Chr3	28.7883	28.1187	29.5169	7.74881	13.126	Cis
17396593	Sec62	SEC62 homolog (S. cerevisiae)	69276	Chr3	+	30.7929	30.8205	UNC4964343	Chr3	30.9513	29.4765	31.0412	7.60177	9.90385	Cis
17396733	Actl6a	actin-like 6A	56456	Chr3	+	32.7086	32.7269	UNC4977284	Chr3	31.8859	30.9778	34.0666	7.83628	9.2829	Cis
17396765	Usp13	ubiquitin specific peptidase 13 (isopeptidase T-3)	72607	Chr3	+	32.8176	32.9374	UNC4980991	Chr3	32.086	30.9513	33.1172	7.67478	11.3766	Cis
17396847	Sox2ot	SOX2 overlapping transcript (non-protein coding)	320478	Chr3	+	34.1045	34.6826	UNC5009091	Chr3	34.0666	28.6508	34.2101	7.82092	9.38781	Cis
17396928	Gm15952	predicted gene 15952	102639351	Chr3	+	35.9331	35.9427	UNC5019615	Chr3	34.7999	34.7999	37.9406	7.75914	8.78877	Cis
17397511	Lhfp	lipoma HMGIC fusion partner	108927	Chr3	+	53.0416	53.2614	UNC5274554	Chr3	53.0406	52.6807	54.5754	8.02334	9.78349	Cis
17397663	Spg20	spastic paraplegia 20, spartin (Troyer syndrome) homolog (human)	229285	Chr3	+	55.1121	55.1368	UNC5305093	Chr3	55.0448	30.0785	56.9714	7.78444	7.93562	Cis
17397663	Spg20	spastic paraplegia 20, spartin (Troyer syndrome) homolog (human)	229285	Chr3	+	55.1121	55.1368	UNC8440819	Chr4	149.877	149.287	149.914	7.78444	10.6343	Trans
17397758	Rnf13	ring finger protein 13	24017	Chr3	+	57.7361	57.8345	UNC5337814	Chr3	57.5675	57.4443	58.6001	7.81334	13.2398	Cis
17397932	Sucnr1	succinate receptor 1	84112	Chr3	+	60.0819	60.0874	UNC23177355	Chr13	97.8457	97.7576	98.2545	9.14041	9.50513	Trans
17397957	P2ry1	purinergic receptor P2Y, G-protein coupled 1	18441	Chr3	+	61.0031	61.0088	UNC8771158	Chr5	21.5983	21.5983	21.5983	7.73838	8.86329	Trans
17398052	Kcnab1	potassium voltage-gated channel, shaker-related subfamily, beta member 1	16497	Chr3	+	65.1095	65.3765	UNC12186306	Chr6	137.177	134.429	137.372	7.82827	8.02458	Trans
17398095	Lekr1	leucine, glutamate and lysine rich 1	624866	Chr3	+	65.6662	65.8311	UNC030088171	Chr3	68.7435	66.1296	73.4016	7.70048	9.08932	Trans
17398180	Mfsd1	major facilitator superfamily domain containing 1	66868	Chr3	+	67.5828	67.6039	UNC5432810	Chr3	66.8268	66.2085	67.4613	7.86962	11.4483	Cis
17398233	Smc4	structural maintenance of chromosomes 4	70099	Chr3	+	69.0049	69.0346	UNC25614010	Chr15	53.9958	53.939	54.1329	8.75923	9.25407	Trans
17398323	Serpini1	serine (or cysteine) peptidase inhibitor, clade I, member 1	20713	Chr3	+	75.5575	75.6428	UNC5545015	Chr3	74.9714	69.9698	76.9356	7.87249	14.9268	Cis
17398485	Fgg	fibrinogen gamma chain	99571	Chr3	+	83.0079	83.015	UNC5682476	Chr3	84.5166	82.8415	84.5574	7.66707	12.6146	Cis
17398634	Sh3d19	SH3 domain protein D19	27059	Chr3	+	86.0844	86.1302	UNC11574389	Chr6	90.5382	88.9043	90.8129	7.92555	8.45839	Trans
17399176	5830417I10Rik	gon-4-like pseudogene	100302730	Chr3	+	88.8202	88.8277	UNC5735085	Chr3	89.2283	88.6536	89.2283	8.90497	19.8741	Cis
17399333	Gba	glucosidase, beta, acid	14466	Chr3	+	89.203	89.2086	UNC5735085	Chr3	89.2283	88.6536	92.6775	11.9989	15.1651	Cis
17399374	Muc1	mucin 1, transmembrane	17829	Chr3	+	89.2291	89.2333	UNC5736210	Chr3	89.3547	89.2283	89.4756	7.65459	20.7217	Cis
17399474	Pmvk	phosphomevalonate kinase	68603	Chr3	+	89.4592	89.469	JAX00529701	Chr3	89.5107	88.6536	89.5378	7.77442	15.0217	Cis
17399549	4933434E20Rik	RIKEN cDNA 4933434E20 gene	99650	Chr3	+	90.0517	90.0633	UNC17071318	Chr9	106.097	105.732	107.583	7.67409	7.79433	Trans
17399672	Slc39a1	solute carrier family 39 (zinc transporter), member 1	30791	Chr3	+	90.2482	90.2529	JAX00529653	Chr3	89.2907	87.3209	92.8112	7.71155	10.0513	Cis
17399754	Ilf2	interleukin enhancer binding factor 2	67781	Chr3	+	90.4762	90.4878	JAX00529653	Chr3	89.2907	88.1588	92.8112	9.12738	9.57089	Cis
17399864	Sprr2b	small proline-rich protein 2B	20756	Chr3	+	92.3178	92.318	UNC29077660	Chr18	38.8046	38.2699	41.6204	7.80652	8.24297	Trans
17399917	Lce3e	late cornified envelope 3E	69514	Chr3	+	92.968	92.9683	JAX00714798	ChrX	84.2019	84.1274	86.1792	10.1335	10.9332	Trans
17400231	Tmod4	tropomodulin 4	50874	Chr3	+	95.1245	95.1292	UNC5768062	Chr3	93.3678	92.0238	95.7297	7.79219	11.7099	Cis
17400365	Ctsk	cathepsin K	13038	Chr3	+	95.4993	95.5092	UNC5784565	Chr3	95.665	91.4152	95.763	7.74324	8.35348	Cis
17400599	Txnip	thioredoxin interacting protein	56338	Chr3	+	96.558	96.5615	UNC5846588	Chr3	101.024	90.4412	101.463	7.73539	10.5969	Trans
17400638	Pex11b	peroxisomal biogenesis factor 11 beta	18632	Chr3	+	96.6354	96.6449	UNC5834365	Chr3	100.139	97.6987	101.935	9.00015	9.47586	Trans
17400732	Pdzk1	PDZ domain containing 1	59020	Chr3	+	96.8293	96.8708	UNC5795561	Chr3	96.9343	96.526	102.022	8.34578	10.008	Cis
17400759	Acp6	acid phosphatase 6, lysophosphatidic	66659	Chr3	+	97.159	97.1766	UNC5812781	Chr3	98.1962	97.6987	99.2375	8.24401	10.8832	Cis
17400773	Fmo5	flavin containing monooxygenase 5	14263	Chr3	+	97.6289	97.6529	JAX00530804	Chr3	96.9327	95.665	99.4699	7.66885	8.06489	Cis
17400875	Zfp697	zinc finger protein 697	242109	Chr3	+	98.3825	98.4306	UNC4354084	Chr2	161.205	160.093	161.305	7.67241	8.35578	Trans
17400881	Gm12440	predicted gene 12440	102634753	Chr3	+	99.0523	99.0537	UNC125332	Chr1	12.8805	10.8494	13.7826	7.85854	8.69505	Trans
17400966	Gdap2	ganglioside-induced differentiation-associated-protein 2	14547	Chr3	+	100.162	100.206	UNC5835687	Chr3	100.244	99.1712	101.83	7.68256	15.1483	Cis
17400966	Gdap2	ganglioside-induced differentiation-associated-protein 2	14547	Chr3	+	100.162	100.206	UNC18832102	Chr10	119.278	117.757	119.575	7.68256	8.25324	Trans
17400998	Vtcn1	V-set domain containing T cell activation inhibitor 1	242122	Chr3	+	100.825	100.896	UNC3379425	Chr2	77.6812	77.5684	84.8417	7.9596	9.30799	Trans
17401072	Tspan2	tetraspanin 2	70747	Chr3	+	102.735	102.77	UNC5852110	Chr3	101.408	101.076	107.121	7.85805	8.66577	Cis
17401261	Bcl2l15	BCLl2-like 15	229672	Chr3	+	103.833	103.855	JAX00532796	Chr3	105.145	105.064	107.121	7.87096	10.0491	Cis
17401269	Ptpn22	protein tyrosine phosphatase, non-receptor type 22 (lymphoid)	19260	Chr3	+	103.86	103.912	JAX00493565	Chr2	76.1028	75.3275	97.824	7.75349	8.2946	Trans
17401308	Phtf1	putative homeodomain transcription factor 1	18685	Chr3	+	103.968	104.007	UNC5885989	Chr3	104.187	89.3547	104.683	7.92556	8.50607	Cis
17401394	Kcnd3	potassium voltage-gated channel, Shal-related family, member 3	56543	Chr3	+	105.452	105.674	UNC5891181	Chr3	104.788	101.853	105.293	7.74109	14.7286	Cis
17401500	Dram2	DNA-damage regulated autophagy modulator 2	67171	Chr3	+	106.548	106.574	UNC5890432	Chr3	104.744	104.559	107.121	7.63498	13.3383	Cis
17401610	Gstm5	glutathione S-transferase, mu 5	14866	Chr3	+	107.896	107.899	backupUNC030680012	Chr3	108.5	107.298	108.519	7.85155	18.9489	Cis
17401710	Psrc1	proline/serine-rich coiled-coil 1	56742	Chr3	+	108.384	108.388	UNC24664186	Chr14	104.874	103.588	106.182	7.71346	7.75414	Trans
17401970	Olfm3	olfactomedin 3	229759	Chr3	+	114.904	115.123	UNC5990188	Chr3	113.637	109.729	117.243	8.98117	14.2821	Cis
17402039	Lrrc39	leucine rich repeat containing 39	109245	Chr3	+	116.563	116.582	JAX00189265	Chr3	109.018	102.096	114.117	7.97949	12.514	Trans
17402072	Frrs1	ferric-chelate reductase 1	20321	Chr3	+	116.86	116.904	UNC6042342	Chr3	117.122	116.545	117.178	7.70584	30.653	Cis
17402099	Plppr5	phospholipid phosphatase related 5	75769	Chr3	+	117.575	117.689	JAX00535130	Chr3	117.433	117.41	117.943	7.8377	13.8384	Cis
17402193	Arhgap29	Rho GTPase activating protein 29	214137	Chr3	+	121.953	122.016	backupUNC030192101	Chr3	120.842	118.88	122.972	7.80129	8.47449	Cis
17402222	Abca4	ATP-binding cassette, sub-family A (ABC1), member 4	11304	Chr3	+	122.045	122.18	UNC6108077	Chr3	121.932	121.801	122.486	7.57466	18.1408	Cis
17402361	Sec24d	Sec24 related gene family, member D (S. cerevisiae)	69608	Chr3	+	123.27	123.365	UNC6130175	Chr3	123.395	123.122	125.99	7.50828	7.54888	Cis
17402519	Tifa	TRAF-interacting protein with forkhead-associated domain	211550	Chr3	+	127.79	127.832	UNC24041294	Chr14	55.6021	49.8627	56.7961	7.67037	7.67498	Trans
17402572	Cfi	complement component factor i	12630	Chr3	+	129.837	129.875	UNC29668690	Chr18	78.9024	77.1815	80.3825	7.69562	7.77226	Trans
17402572	Cfi	complement component factor i	12630	Chr3	+	129.837	129.875	JAX00537582	Chr3	130.184	129.613	130.226	7.69562	21.0178	Cis
17402642	Etnppl	ethanolamine phosphate phospholyase	71760	Chr3	+	130.618	130.636	UNC030227936	Chr3	130.508	130.289	130.924	7.54745	13.9483	Cis
17402698	Dkk2	dickkopf WNT signaling pathway inhibitor 2	56811	Chr3	+	132.085	132.18	UNC030231288	Chr3	132.938	131.697	133.254	7.75141	9.83783	Cis
17402711	Tbck	TBC1 domain containing kinase	271981	Chr3	+	132.684	132.838	UNC030637510	Chr3	135.31	132.998	136.06	7.77986	10.7903	Trans
17402905	Manba	mannosidase, beta A, lysosomal	110173	Chr3	+	135.486	135.571	UNC030637510	Chr3	135.31	135.155	135.471	7.7121	19.1532	Cis
17403070	Gm40156	predicted gene, 40156	105244563	Chr3	+	138.261	138.291	UNC6351262	Chr3	138.245	137.798	138.766	7.83215	14.0694	Cis
17403237	Gbp3	guanylate binding protein 3	55932	Chr3	+	142.56	142.573	UNC6411461	Chr3	142.041	141.828	143.675	7.73728	10.2694	Cis
17403255	Gbp2b	guanylate binding protein 2b	14468	Chr3	+	142.595	142.619	UNC6407042	Chr3	141.781	141.724	142.883	7.55766	12.9563	Cis
17403706	Pigk	phosphatidylinositol glycan anchor biosynthesis, class K	329777	Chr3	+	152.714	152.787	UNC6556592	Chr3	152.715	152.182	152.715	7.76747	26.3556	Cis
17403775	Cryz	crystallin, zeta	12972	Chr3	+	154.597	154.623	UNC6589820	Chr3	154.849	154.034	154.851	8.84397	11.4697	Cis
17403950	Wls	wntless WNT ligand secretion mediator	68151	Chr3	+	159.84	159.936	UNC6626900	Chr3	158.451	158.287	159.878	7.99954	9.11853	Cis
17403985	1700008P02Rik	RIKEN cDNA 1700008P02 gene	69347	Chr3	-	6.61545	6.62044	UNC20436119	Chr11	113.85	112.111	113.884	8.10964	8.40741	Trans
17404021	Mrps28	mitochondrial ribosomal protein S28	66230	Chr3	-	8.8022	8.92391	UNC4677651	Chr3	9.02286	3.16389	10.688	7.8232	9.1859	Cis
17404174	1810022K09Rik	RIKEN cDNA 1810022K09 gene	69126	Chr3	-	14.6111	14.6112	UNC6236535	Chr3	130.117	129.786	130.55	8.19567	8.71401	Trans
17404239	Gm30340	predicted gene, 30340	102632200	Chr3	-	17.7837	17.7869	UNC4781143	Chr3	16.9409	16.8923	18.3794	8.93265	11.5527	Cis
17404291	1700064H15Rik	RIKEN cDNA 1700064H15 gene	102633032	Chr3	-	19.6104	19.6287	backupUNC030018403	Chr3	19.6666	19.1609	21.2403	7.73062	8.0655	Cis
17404300	Hps3	HPS3, biogenesis of lysosomal organelles complex 2 subunit 1	12807	Chr3	-	19.9969	20.0353	UNC4826222	Chr3	20.3058	18.4764	21.2403	7.85995	14.0285	Cis
17404373	Naaladl2	N-acetylated alpha-linked acidic dipeptidase-like 2	635702	Chr3	-	23.805	24.7835	UNC4887778	Chr3	24.796	23.3902	25.5423	7.72646	11.2505	Cis
17404464	Tmem212	transmembrane protein 212	208613	Chr3	-	27.8661	27.8964	UNC19674597	Chr11	56.0222	55.2183	58.5013	8.37738	8.39426	Trans
17404478	Mecom	MDS1 and EVI1 complex locus	14013	Chr3	-	29.9518	30.1404	backupUNC090353537	Chr9	92.317	87.2212	96.5136	7.90843	8.0556	Trans
17404534	Lrrc31	leucine rich repeat containing 31	320352	Chr3	-	30.6791	30.6998	JAX00518294	Chr3	30.3354	30.3151	30.9442	7.8351	25.6274	Cis
17404570	Slc7a14	solute carrier family 7 (cationic amino acid transporter, y+ system), member 14	241919	Chr3	-	31.2041	31.3104	UNC9047380	Chr5	42.7247	42.2482	45.2902	8.13131	8.34595	Trans
17404628	Pex5l	peroxisomal biogenesis factor 5-like	58869	Chr3	-	32.9498	33.1429	JAX00519141	Chr3	34.1807	30.3005	34.5805	7.81853	8.59865	Cis
17404682	Dnajc19	DnaJ heat shock protein family (Hsp40) member C19	67713	Chr3	-	34.0564	34.0813	UNC5009091	Chr3	34.0666	32.0517	34.2676	8.47852	9.91545	Cis
17404750	Mccc1	methylcrotonoyl-Coenzyme A carboxylase 1 (alpha)	72039	Chr3	-	35.9596	36.0007	UNC5024595	Chr3	35.1144	34.3175	36.5994	8.67926	9.23757	Cis
17404835	Bbs7	Bardet-Biedl syndrome 7 (human)	71492	Chr3	-	36.5733	36.6134	UNC5051721	Chr3	36.918	36.5545	37.2493	7.44304	21.4515	Cis
17404859	Trpc3	transient receptor potential cation channel, subfamily C, member 3	22065	Chr3	-	36.6207	36.69	UNC5049556	Chr3	36.7632	36.4812	36.8547	7.8493	10.7057	Cis
17404896	Cetn4	centrin 4	207175	Chr3	-	37.3081	37.3127	UNC5056959	Chr3	37.3414	36.9734	38.2528	7.6646	11.9155	Cis
17404911	Nudt6	nudix (nucleoside diphosphate linked moiety X)-type motif 6	229228	Chr3	-	37.4049	37.4202	UNC5049556	Chr3	36.7632	36.5545	38.1701	7.61927	11.5386	Cis
17404923	Gm5148	predicted gene 5148	381438	Chr3	-	37.7143	37.7245	UNC5066180	Chr3	38.0093	37.3804	38.2702	7.46299	18.4935	Cis
17404976	Mfsd8	major facilitator superfamily domain containing 8	72175	Chr3	-	40.8181	40.8468	UNC5104497	Chr3	40.3587	38.4704	45.3928	8.24916	10.446	Cis
17405001	1700034I23Rik	FUN14 domain containing 2 pseudogene	73297	Chr3	-	40.9002	40.9007	UNC4312479	Chr2	158.325	157.169	158.385	7.79603	8.40515	Trans
17405142	Setd7	SET domain containing (lysine methyltransferase) 7	73251	Chr3	-	51.5189	51.5609	UNC24400672	Chr14	86.1465	82.2744	90.9085	7.67996	7.72552	Trans
17405142	Setd7	SET domain containing (lysine methyltransferase) 7	73251	Chr3	-	51.5189	51.5609	UNC7860297	Chr4	102.13	98.4149	103.779	7.67996	7.73492	Trans
17405247	Exosc8	exosome component 8	69639	Chr3	-	54.7288	54.7354	UNC5301460	Chr3	54.8196	53.9854	54.8592	7.6373	12.2721	Cis
17405380	Commd2	COMM domain containing 2	52245	Chr3	-	57.6432	57.6516	JAX00107800	Chr3	57.6909	57.5675	57.7777	7.73141	19.1043	Cis
17405737	Lxn	latexin	17035	Chr3	-	67.4581	67.4638	JAX00525709	Chr3	67.8077	66.5524	69.2791	7.63043	22.1659	Cis
17405746	Rarres1	retinoic acid receptor responder (tazarotene induced) 1	109222	Chr3	-	67.479	67.5155	UNC5436081	Chr3	67.2848	66.7672	67.5172	7.64546	26.2469	Cis
17405819	B3galnt1	UDP-GalNAc:betaGlcNAc beta 1,3-galactosaminyltransferase, polypeptide 1	26879	Chr3	-	69.5742	69.5988	UNC5466669	Chr3	69.4336	69.3493	73.4083	7.80974	15.5358	Cis
17405827	Sptssb	serine palmitoyltransferase, small subunit B	66183	Chr3	-	69.8197	69.8599	UNC25624794	Chr15	54.781	54.781	55.0068	9.18859	13.2914	Trans
17406129	Tmem144	transmembrane protein 144	70652	Chr3	-	79.8138	79.8427	UNC5618267	Chr3	80.1272	75.8634	81.1631	8.18404	8.43196	Cis
17406247	Lrat	lecithin-retinol acyltransferase (phosphatidylcholine-retinol-O-acyltransferase)	79235	Chr3	-	82.8929	82.904	UNC5658621	Chr3	82.7492	81.9808	87.1308	7.77517	8.99072	Cis
17406252	Fgb	fibrinogen beta chain	110135	Chr3	-	83.0423	83.0498	UNC5680234	Chr3	84.3543	83.7887	84.498	7.82763	15.1847	Cis
17406656	Naxe	NAD(P)HX epimerase	246703	Chr3	-	88.0565	88.0584	UNC5730900	Chr3	88.6536	88.0213	93.304	7.86767	8.0387	Cis
17406682	1700113A16Rik	RIKEN cDNA 1700113A16 gene	76642	Chr3	-	88.1716	88.1778	UNC5718487	Chr3	87.3842	86.0994	101.2	8.31839	11.2459	Cis
17406718	Bglap3	bone gamma-carboxyglutamate protein 3	12095	Chr3	-	88.3696	88.3727	UNC9868457	Chr5	106.989	106.686	108.596	10.1956	12.9317	Trans
17406745	Pmf1	polyamine-modulated factor 1	67037	Chr3	-	88.3942	88.4102	JAX00013222	Chr1	180.247	171.426	183.605	7.92556	8.67953	Trans
17406752	Slc25a44	solute carrier family 25, member 44	229517	Chr3	-	88.4112	88.4251	UNC5718487	Chr3	87.3842	85.6469	89.5107	8.34291	8.96493	Cis
17406760	Sema4a	sema domain, immunoglobulin domain (Ig), transmembrane domain (TM) and short cytoplasmic domain, (semaphorin) 4A	20351	Chr3	-	88.4361	88.4591	UNC5723775	Chr3	87.9116	87.3209	101.408	7.59656	13.9439	Cis
17406892	Rusc1	RUN and SH3 domain containing 1	72296	Chr3	-	89.0841	89.0933	UNC5549039	Chr3	75.3642	69.8403	89.4756	7.77911	8.07694	Trans
17407001	Efna3	ephrin A3	13638	Chr3	-	89.3142	89.3228	UNC22185260	Chr13	17.1128	15.721	18.5588	7.65426	8.61164	Trans
17407306	Npr1	natriuretic peptide receptor 1	18160	Chr3	-	90.4511	90.4649	UNC11684861	Chr6	99.0337	95.6741	100.485	7.85471	8.30436	Trans
17407716	Tnfaip8l2	tumor necrosis factor, alpha-induced protein 8-like 2	69769	Chr3	-	95.1396	95.1406	JAX00514966	Chr3	10.8883	9.91615	19.1275	8.53549	8.60658	Trans
17407738	Mllt11	myeloid/lymphoid or mixed-lineage leukemia; translocated to, 11	56772	Chr3	-	95.2186	95.2286	UNC5841910	Chr3	100.756	96.9297	101.285	7.89541	11.1554	Trans
17407742	Gm128	predicted gene 128	229588	Chr3	-	95.237	95.2413	JAX00530641	Chr3	95.9897	84.7154	96.6559	7.83631	25.5036	Cis
17407764	Prune1	prune exopolyphosphatase	229589	Chr3	-	95.2539	95.2819	UNC_rs33036281	Chr3	93.4827	90.4412	101.956	7.90774	9.54594	Cis
17407798	Setdb1	SET domain, bifurcated 1	84505	Chr3	-	95.3238	95.3481	UNC5783796	Chr3	95.5644	92.9211	95.763	8.49796	8.91659	Cis
17407934	Ciart	circadian associated repressor of transcription	229599	Chr3	-	95.8785	95.8822	UNC12798445	Chr7	49.6797	49.2114	50.0308	7.79903	8.29903	Trans
17408021	Hist2h4	histone cluster 2, H4	97122	Chr3	-	96.2618	96.2628	UNC5786838	Chr3	95.8959	90.866	96.6559	7.87937	10.8982	Cis
17408273	Phgdh	3-phosphoglycerate dehydrogenase	236539	Chr3	-	98.3132	98.3399	UNC5835687	Chr3	100.244	97.0544	100.287	7.98128	9.65172	Cis
17408289	Gm4450	predicted gene 4450	100043461	Chr3	-	98.4566	98.4567	UNC5616770	Chr3	80.033	73.732	80.5813	7.74159	9.67521	Trans
17408323	Hsd3b2	hydroxy-delta-5-steroid dehydrogenase, 3 beta- and steroid delta-isomerase 2	15493	Chr3	-	98.7106	98.7246	UNC5806002	Chr3	97.7525	97.7525	99.1712	7.72598	26.0482	Cis
17408336	Hsd3b3	hydroxy-delta-5-steroid dehydrogenase, 3 beta- and steroid delta-isomerase 3	15494	Chr3	-	98.7418	98.7535	UNC5834365	Chr3	100.139	97.2141	101.76	8.58955	10.7062	Cis
17408444	Ttf2	transcription termination factor, RNA polymerase II	74044	Chr3	-	100.939	100.97	JAX00110988	Chr3	100.719	97.0977	101.356	7.74647	11.0576	Cis
17408684	Dclre1b	DNA cross-link repair 1B	140917	Chr3	-	103.802	103.809	UNC5888276	Chr3	104.559	102.017	114.117	7.56445	8.41843	Cis
17408974	Cym	chymosin	229697	Chr3	-	107.211	107.222	UNC5893653	Chr3	105.035	103.709	107.474	8.07025	14.1878	Trans
17408999	Kcnc4	potassium voltage gated channel, Shaw-related subfamily, member 4	99738	Chr3	-	107.438	107.459	UNC5917724	Chr3	107.394	107.19	107.474	7.58733	28.1288	Cis
17409005	Slc6a17	solute carrier family 6 (neurotransmitter transporter), member 17	229706	Chr3	-	107.468	107.518	UNC5918145	Chr3	107.429	105.955	107.474	7.71427	15.8633	Cis
17409005	Slc6a17	solute carrier family 6 (neurotransmitter transporter), member 17	229706	Chr3	-	107.468	107.518	UNC3867825	Chr2	122.172	118.949	125.212	7.71427	7.75508	Trans
17409090	4933431E20Rik	RIKEN cDNA 4933431E20 gene	329735	Chr3	-	107.891	107.896	JAX00533645	Chr3	108.905	107.86	108.916	8.5973	21.8902	Cis
17409099	Gstm7	glutathione S-transferase, mu 7	68312	Chr3	-	107.927	107.932	UNC5922148	Chr3	107.86	107.773	108.225	7.69764	23.0174	Cis
17409154	Gstm1	glutathione S-transferase, mu 1	14862	Chr3	-	108.013	108.018	JAX00533282	Chr3	107.211	105.422	108.5	7.68974	19.108	Cis
17409172	Gstm4	glutathione S-transferase, mu 4	14865	Chr3	-	108.041	108.045	JAX00533571	Chr3	108.519	105.422	109.255	7.64416	8.61053	Cis
17409243	Atxn7l2	ataxin 7-like 2	72522	Chr3	-	108.202	108.211	backupUNC030680012	Chr3	108.5	107.46	109.466	7.82873	16.4377	Cis
17409261	Sypl2	synaptophysin-like 2	17306	Chr3	-	108.212	108.227	UNC5939280	Chr3	109.255	105.425	109.49	7.81447	8.55904	Cis
17409343	5330417C22Rik	RIKEN cDNA 5330417C22 gene	229722	Chr3	-	108.458	108.536	UNC8871723	Chr5	28.8266	28.732	31.8994	7.66986	8.00869	Trans
17409343	5330417C22Rik	RIKEN cDNA 5330417C22 gene	229722	Chr3	-	108.458	108.536	JAX00047503	Chr13	90.2607	89.4319	94.0075	7.66986	8.7749	Trans
17409463	Fam102b	family with sequence similarity 102, member B	329739	Chr3	-	108.971	109.028	UNC5934220	Chr3	108.916	108.731	109.49	7.98104	22.6509	Cis
17409627	A930005H10Rik	RIKEN cDNA A930005H10 gene	68161	Chr3	-	115.882	115.888	JAX00001692	Chr1	25.6979	25.4008	29.3954	7.89666	8.70895	Trans
17409627	A930005H10Rik	RIKEN cDNA A930005H10 gene	68161	Chr3	-	115.882	115.888	UNC30605071	Chr19	61.2377	61.1326	61.2613	7.89666	8.76019	Trans
17409627	A930005H10Rik	RIKEN cDNA A930005H10 gene	68161	Chr3	-	115.882	115.888	UNC6023151	Chr3	115.958	115.578	117.122	7.89666	20.4508	Cis
17409649	Vcam1	vascular cell adhesion molecule 1	22329	Chr3	-	116.11	116.13	UNC4793161	Chr3	18.0116	16.8923	19.0274	8.34159	8.95294	Trans
17409690	Rtca	RNA 3'-terminal phosphate cyclase	66368	Chr3	-	116.489	116.508	UNC6026702	Chr3	116.201	115.958	117.021	7.65843	11.9216	Cis
17409736	Slc35a3	solute carrier family 35 (UDP-N-acetylglucosamine (UDP-GlcNAc) transporter), member 3	229782	Chr3	-	116.67	116.713	UNC6034783	Chr3	116.692	116.136	117.488	7.88853	14.9266	Cis
17409893	Slc44a3	solute carrier family 44, member 3	213603	Chr3	-	121.46	121.532	UNC111342185	Chr11	60.7283	59.3172	114.2	7.64034	7.93406	Trans
17409893	Slc44a3	solute carrier family 44, member 3	213603	Chr3	-	121.46	121.532	UNC6102442	Chr3	121.567	119.061	125.564	7.64034	8.22772	Cis
17410114	Ugt8a	UDP galactosyltransferase 8A	22239	Chr3	-	125.866	125.939	UNC6134567	Chr3	123.642	123.52	127.012	7.73114	9.50647	Trans
17410130	Ank2	ankyrin 2, brain	109676	Chr3	-	126.923	127.499	UNC6192519	Chr3	127.211	126.966	127.261	7.6322	19.0488	Cis
17410204	Alpk1	alpha-kinase 1	71481	Chr3	-	127.671	127.78	UNC030213875	Chr3	127.283	127.283	127.925	7.71483	11.9959	Cis
17410251	Enpep	glutamyl aminopeptidase	13809	Chr3	-	129.269	129.333	UNC6220716	Chr3	129.099	129.093	129.504	8.10694	16.689	Cis
17410376	Ostc	oligosaccharyltransferase complex subunit (non-catalytic)	66357	Chr3	-	130.696	130.709	UNC6239388	Chr3	130.289	129.526	130.924	7.75385	13.8328	Cis
17410400	Cyp2u1	cytochrome P450, family 2, subfamily u, polypeptide 1	71519	Chr3	-	131.291	131.303	UNC6275227	Chr3	132.737	131.075	133.841	7.83198	8.16761	Cis
17410492	Tet2	tet methylcytosine dioxygenase 2	214133	Chr3	-	133.465	133.544	UNC6306364	Chr3	135.202	133.749	136.06	7.56392	11.6973	Cis
17410537	4930539J05Rik	RIKEN cDNA 4930539J05 gene	319587	Chr3	-	135.436	135.439	UNC6315115	Chr3	135.756	134.908	136.261	7.75852	11.6917	Cis
17410636	Mttp	microsomal triglyceride transfer protein	17777	Chr3	-	138.09	138.143	UNC14118059	Chr8	8.50807	6.60155	9.23741	7.75178	8.56985	Trans
17410636	Mttp	microsomal triglyceride transfer protein	17777	Chr3	-	138.09	138.143	UNC16148308	Chr9	34.9886	34.2123	37.0117	7.75178	8.03599	Trans
17410898	Clca4c-ps	chloride channel accessory 4C, pseudogene	622139	Chr3	-	144.879	144.896	UNC29537961	Chr18	70.3076	70.0901	71.2118	7.91201	9.43469	Trans
17411033	Spata1	spermatogenesis associated 1	70951	Chr3	-	146.457	146.495	backupUNC030271400	Chr3	146.042	145.843	146.263	7.85812	16.7661	Cis
17411159	Ifi44l	interferon-induced protein 44 like	15061	Chr3	-	151.76	151.763	UNC12295618	Chr6	144.322	144.18	145.126	7.62906	7.78534	Trans
17411159	Ifi44l	interferon-induced protein 44 like	15061	Chr3	-	151.76	151.763	UNC6544393	Chr3	151.693	151.198	151.982	7.62906	22.1572	Cis
17411174	Gipc2	GIPC PDZ domain containing family, member 2	54120	Chr3	-	152.094	152.166	UNC6550285	Chr3	152.148	151.055	152.162	8.07287	9.82794	Cis
17411262	St6galnac3	ST6 (alpha-N-acetyl-neuraminyl-2,3-beta-galactosyl-1,3)-N-acetylgalactosaminide alpha-2,6-sialyltransferase 3	20447	Chr3	-	153.203	153.725	UNC6566516	Chr3	153.287	153.163	155.328	7.84462	12.1002	Cis
17411401	4930570G19Rik	RIKEN cDNA 4930570G19 gene	329782	Chr3	-	156.547	156.562	UNC2126189	Chr1	166.455	165.267	166.617	7.99005	8.93513	Trans
17548238	Fabp5	fatty acid binding protein 5, epidermal	16592	Chr3	+	10.0161	10.0163	JAX00578266	Chr5	33.5896	31.6009	34.1875	7.7323	8.88433	Trans
17548266	Mrpl47	mitochondrial ribosomal protein L47	74600	Chr3	-	32.7266	32.7269	UNC030305274	Chr3	31.2084	31.0816	34.6785	7.76656	10.8923	Cis
17411503	Tgs1	trimethylguanosine synthase 1	116940	Chr4	+	3.57495	3.61656	UNC23958168	Chr14	47.1341	47.0984	47.3183	7.89613	8.80223	Trans
17411716	4930412C18Rik	RIKEN cDNA 4930412C18 gene	320152	Chr4	+	9.77058	9.82297	UNC6715489	Chr4	9.77373	9.24719	9.79572	7.56437	22.1047	Cis
17411744	Gm11827	predicted gene 11827	100503518	Chr4	+	11.1228	11.1269	UNC6715489	Chr4	9.77373	8.41344	9.89175	8.28208	10.4214	Cis
17411907	Triqk	triple QxxK/R motif containing	208820	Chr4	+	12.9069	12.9813	UNC6752779	Chr4	12.8004	12.6991	14.8057	7.61109	13.8669	Cis
17411939	Tmem55a	transmembrane protein 55A	72519	Chr4	+	14.8643	14.915	JAX00545869	Chr4	15.4	14.7541	16.268	8.45421	8.85508	Cis
17411966	Calb1	calbindin 1	12307	Chr4	+	15.8813	15.9069	UNC6835865	Chr4	19.1659	14.6603	20.353	9.01226	9.57657	Trans
17412296	Epha7	Eph receptor A7	13841	Chr4	+	28.8132	28.9669	JAX00547070	Chr4	25.9481	25.9481	29.997	7.98578	24.4105	Trans
17412418	Mdn1	midasin AAA ATPase 1	100019	Chr4	+	32.6571	32.7749	UNC7021262	Chr4	32.8697	31.8508	33.8417	7.75829	8.49085	Cis
17412539	Rragd	Ras-related GTP binding D	52187	Chr4	+	32.983	33.0198	UNC7028468	Chr4	33.2807	32.9088	33.8417	8.14536	8.7774	Cis
17412793	Spink4	serine peptidase inhibitor, Kazal type 4	20731	Chr4	+	40.9201	40.9314	UNC040495987	Chr4	41.033	40.7842	41.7609	7.96137	8.28308	Cis
17412871	Nudt2	nudix (nucleoside diphosphate linked moiety X)-type motif 2	66401	Chr4	+	41.4775	41.4809	UNC7123807	Chr4	41.7061	41.3285	41.7609	7.65518	9.87226	Cis
17413039	Gm13306	predicted gene 13306	100039863	Chr4	+	42.1557	42.1558	JAX00548922	Chr4	41.5223	41.3285	44.0304	7.50609	14.8514	Cis
17413221	Unc13b	unc-13 homolog B (C. elegans)	22249	Chr4	+	43.059	43.2645	UNC041043835	Chr4	42.8802	42.8727	43.1489	7.91299	38.0572	Cis
17413269	Atp8b5	ATPase, class I, type 8B, member 5	320571	Chr4	+	43.2672	43.3737	UNC7124648	Chr4	42.8727	41.7609	44.2969	7.67225	8.72117	Cis
17413352	Car9	carbonic anhydrase 9	230099	Chr4	+	43.507	43.5135	UNC040392781	Chr4	42.9656	42.8727	43.9542	7.56764	10.3895	Cis
17413384	Rgp1	RAB6A GEF compex partner 1	242406	Chr4	+	43.5789	43.5874	UNC19569586	Chr11	47.6461	47.2169	48.7145	7.71352	8.32581	Trans
17413436	Tmem8b	transmembrane protein 8B	242409	Chr4	+	43.669	43.6905	UNC7143768	Chr4	44.0304	42.8727	45.0052	7.88017	13.5212	Cis
17413463	Spaar	small regulatory polypeptide of amino acid response	71406	Chr4	+	43.7301	43.7336	UNC7151917	Chr4	44.6086	42.8727	45.3736	8.12892	9.02425	Cis
17413553	Zcchc7	zinc finger, CCHC domain containing 7	319885	Chr4	+	44.7559	44.9318	UNC7156173	Chr4	44.9948	42.8727	45.1976	7.85203	13.7715	Cis
17413567	Gm12678	predicted gene 12678	102632657	Chr4	+	44.9438	44.9483	UNC22777815	Chr13	67.7623	64.8399	69.3752	7.62051	12.3049	Trans
17413678	Stra6l	STRA6-like	74152	Chr4	+	45.8487	45.8855	JAX00118462	Chr4	45.6387	44.6082	46.8304	7.8554	9.93363	Cis
17413978	Invs	inversin	16348	Chr4	+	48.2798	48.431	UNC7190442	Chr4	47.3287	46.7366	51.8369	7.61639	11.1534	Cis
17414250	Tmem38b	transmembrane protein 38B	52076	Chr4	+	53.8261	53.8614	UNC7277188	Chr4	54.4398	53.5722	54.5118	7.40151	19.9822	Cis
17414277	Zfp462	zinc finger protein 462	242466	Chr4	+	54.9451	55.0832	UNC7281349	Chr4	54.7748	54.5286	55.7803	7.71858	8.56965	Cis
17414318	Gm12511	predicted gene 12511	791419	Chr4	+	55.5633	55.5991	UNC19518054	Chr11	44.1101	42.83	46.2929	7.73054	8.04279	Trans
17414385	Musk	muscle, skeletal, receptor tyrosine kinase	18198	Chr4	+	58.286	58.3774	UNC7325161	Chr4	57.9467	57.2039	58.642	7.80141	11.5972	Cis
17414572	Bspry	B-box and SPRY domain containing	192120	Chr4	+	62.4803	62.4972	UNC7357403	Chr4	62.4829	60.0051	63.7346	7.6466	16.3736	Cis
17414760	Atp6v1g1	ATPase, H+ transporting, lysosomal V1 subunit G1	66290	Chr4	+	63.5449	63.5507	UNC7368299	Chr4	63.3047	63.0693	64.3699	7.69758	8.23393	Cis
17415012	Gm11184	predicted gene 11184	102636232	Chr4	+	83.3831	83.3922	UNC21392800	Chr12	73.162	72.2227	73.6196	7.90561	8.07405	Trans
17415035	Ccdc171	coiled-coil domain containing 171	320226	Chr4	+	83.5256	83.8647	UNC7628645	Chr4	83.5145	83.1508	83.7628	7.74579	16.5816	Cis
17415136	Adamtsl1	ADAMTS-like 1	77739	Chr4	+	86.054	86.4266	UNC7653505	Chr4	85.38	84.7342	90.0899	7.93119	8.79655	Cis
17415219	Acer2	alkaline ceramidase 2	230379	Chr4	+	86.8745	86.9343	UNC7661971	Chr4	85.9528	83.7628	86.9051	7.74845	9.72087	Cis
17415544	Fggy	FGGY carbohydrate kinase domain containing	75578	Chr4	+	95.5576	95.9268	UNC7725434	Chr4	91.2336	90.7206	96.5295	8.14975	8.98615	Trans
17415728	Angptl3	angiopoietin-like 3	30924	Chr4	+	99.031	99.0458	UNC7842814	Chr4	100.794	98.9002	100.794	8.97424	11.965	Cis
17415768	Atg4c	autophagy related 4C, cysteine peptidase	242557	Chr4	+	99.2959	99.2966	UNC7799863	Chr4	97.5016	83.1082	101.136	7.78323	8.44143	Cis
17415798	Efcab7	EF-hand calcium binding domain 7	230500	Chr4	+	99.8293	99.9127	UNC7707329	Chr4	89.6573	88.3492	90.3669	7.73631	8.80944	Trans
17415815	Pgm2	phosphoglucomutase 2	72157	Chr4	+	99.9294	99.987	UNC26483762	Chr16	23.9249	23.1012	24.4018	8.33768	8.78049	Trans
17416061	Sgip1	SH3-domain GRB2-like (endophilin) interacting protein 1	73094	Chr4	+	102.759	102.972	UNC7896222	Chr4	104.737	103.901	104.943	7.69988	10.0143	Cis
17416212	Fyb2	FYN binding protein 2	242594	Chr4	+	104.914	105.016	UNC7868928	Chr4	102.741	101.733	104.882	7.98015	9.1447	Trans
17416243	Gm12724	predicted gene 12724	105244641	Chr4	+	106.245	106.29	UNC8372175	Chr4	141.381	140.945	141.807	8.07593	8.79936	Trans
17416397	Cyb5rl	cytochrome b5 reductase-like	230582	Chr4	+	107.067	107.087	UNC7928876	Chr4	107.019	105.378	109.878	7.65716	10.1144	Cis
17416415	Cdcp2	CUB domain containing protein 2	242603	Chr4	+	107.097	107.108	JAX00374766	Chr14	22.0395	20.8705	22.4642	7.81535	8.99019	Trans
17416448	Hspb11	heat shock protein family B (small), member 11	72938	Chr4	+	107.254	107.28	UNC7935069	Chr4	107.479	106.698	108.781	8.21381	10.1316	Cis
17416576	0610037L13Rik	RIKEN cDNA 0610037L13 gene	74098	Chr4	+	107.89	107.899	backupUNC040220249	Chr4	108.585	107.586	108.635	8.06561	21.8064	Cis
17416764	Rab3b	RAB3B, member RAS oncogene family	69908	Chr4	+	108.879	108.943	UNC7960417	Chr4	109.667	106.564	112.952	7.71142	8.54201	Cis
17416773	Nrd1	nardilysin, N-arginine dibasic convertase, NRD convertase 1	230598	Chr4	+	109.001	109.061	JAX00123104	Chr4	109.077	107.586	112.952	8.21602	12.8146	Cis
17416862	Ttc39a	tetratricopeptide repeat domain 39A	230603	Chr4	+	109.407	109.445	B6_rs3680956	Chr4	109.874	108.273	113.334	7.74274	10.888	Cis
17416926	Agbl4	ATP/GTP binding protein-like 4	78933	Chr4	+	110.398	111.664	JAX00562601	Chr4	114.893	108.367	117.336	7.79725	8.98749	Trans
17416967	Spata6	spermatogenesis associated 6	67946	Chr4	+	111.72	111.829	UNC15836118	Chr9	10.4216	4.37413	14.4578	7.83217	7.8531	Trans
17416967	Spata6	spermatogenesis associated 6	67946	Chr4	+	111.72	111.829	UNC7980424	Chr4	111.737	110.34	112.952	7.83217	23.3024	Cis
17417090	Trabd2b	TraB domain containing 2B	666048	Chr4	+	114.409	114.614	UNC8030562	Chr4	114.823	109.782	116.255	8.13705	11.4144	Cis
17417099	Gm12829	predicted gene 12829	102636500	Chr4	+	114.681	114.688	UNC31211506	ChrX	111.085	109.594	128.291	7.82052	8.95357	Trans
17417099	Gm12829	predicted gene 12829	102636500	Chr4	+	114.681	114.688	JAX00562503	Chr4	114.454	108.838	116.167	7.82052	14.7835	Cis
17417195	Cyp4a12b	cytochrome P450, family 4, subfamily a, polypeptide 12B	13118	Chr4	+	115.433	115.439	UNC28229125	Chr17	67.4603	34.3451	67.6009	7.55708	7.60493	Trans
17417195	Cyp4a12b	cytochrome P450, family 4, subfamily a, polypeptide 12B	13118	Chr4	+	115.433	115.439	UNC7992952	Chr4	112.952	110.431	115.945	7.55708	18.2575	Trans
17417255	Cyp4a32	cytochrome P450, family 4, subfamily a, polypeptide 32	100040843	Chr4	+	115.602	115.622	JAX00562661	Chr4	115.228	114.383	116.811	7.62899	15.6687	Cis
17417437	Gpbp1l1	GC-rich promoter binding protein 1-like 1	77110	Chr4	+	116.558	116.594	JAX00562503	Chr4	114.454	109.398	116.811	7.82189	8.43998	Trans
17417512	Tesk2	testis-specific kinase 2	230661	Chr4	+	116.721	116.806	backupUNC040654183	Chr4	116.693	110.34	118.524	7.63218	13.1519	Cis
17417738	Hyi	hydroxypyruvate isomerase (putative)	68180	Chr4	+	118.36	118.363	UNC8066026	Chr4	118.214	116.023	124.636	7.71225	8.25533	Cis
17417872	P3h1	prolyl 3-hydroxylase 1	56401	Chr4	+	119.233	119.249	UNC8771158	Chr5	21.5983	21.1486	108.53	7.62531	7.93999	Trans
17418035	Cited4	Cbp/p300-interacting transactivator, with Glu/Asp-rich carboxy-terminal domain, 4	56222	Chr4	+	120.667	120.668	UNC8099452	Chr4	120.691	120.131	120.932	7.7411	8.66256	Cis
17418304	Mir697	microRNA 697	735277	Chr4	+	124.732	124.732	UNC29423407	Chr18	63.0848	63.0116	64.069	8.21054	8.72706	Trans
17418391	9930104L06Rik	RIKEN cDNA 9930104L06 gene	194268	Chr4	+	124.937	124.944	JAX00071687	Chr16	81.1367	77.4795	83.8973	7.72911	7.7308	Trans
17418592	Clspn	claspin	269582	Chr4	+	126.557	126.593	UNC4023485	Chr2	134.952	128.214	135.677	8.31211	8.84818	Trans
17418640	AU040320	expressed sequence AU040320	100317	Chr4	+	126.754	126.87	JAX00565280	Chr4	126.574	125.612	126.904	7.77828	10.1928	Cis
17418701	Zmym6	zinc finger, MYM-type 6	100177	Chr4	+	127.077	127.123	UNC8176386	Chr4	127.349	126.879	127.443	7.84992	10.4503	Cis
17418999	Bsdc1	BSD domain containing 1	100383	Chr4	+	129.462	129.488	UNC8215291	Chr4	129.902	129.527	130.823	7.8992	13.3514	Cis
17419015	Fam229a	family with sequence similarity 229, member A	68233	Chr4	+	129.491	129.492	UNC10592645	Chr6	13.7207	8.65898	15.8399	7.73132	8.58833	Trans
17419025	Tmem234	transmembrane protein 234	76799	Chr4	+	129.601	129.608	UNC8209438	Chr4	129.443	129.426	130.823	8.1944	21.336	Cis
17419044	Ptp4a2	protein tyrosine phosphatase 4a2	19244	Chr4	+	129.811	129.849	backupUNC050233090	Chr5	139.528	139.241	139.628	7.91499	8.35412	Trans
17419543	Cd164l2	CD164 sialomucin-like 2	69655	Chr4	+	133.212	133.224	UNC8254067	Chr4	133.276	132.937	134.467	7.78908	7.8007	Cis
17419741	Slc30a2	solute carrier family 30 (zinc transporter), member 2	230810	Chr4	+	134.343	134.353	UNC8256710	Chr4	133.509	133.276	134.582	7.79455	12.5282	Cis
17419773	Stmn1	stathmin 1	16765	Chr4	+	134.468	134.474	JAX00567416	Chr4	134.467	133.509	135.347	7.81887	11.2641	Cis
17419783	Paqr7	progestin and adipoQ receptor family member VII	71904	Chr4	+	134.497	134.51	JAX00567486	Chr4	134.666	133.563	135.314	7.59504	8.75489	Cis
17419812	Rsrp1	arginine/serine rich protein 1	27981	Chr4	+	134.924	134.928	UNC8283255	Chr4	135.347	134.772	135.385	7.62372	8.97945	Cis
17419857	Stpg1	sperm tail PG rich repeat containing 1	78806	Chr4	+	135.495	135.538	UNC8284754	Chr4	135.427	135.385	136.024	7.79849	11.5347	Cis
17419890	Il22ra1	interleukin 22 receptor, alpha 1	230828	Chr4	+	135.728	135.755	UNC8292193	Chr4	135.912	133.325	137.072	7.92276	8.23595	Cis
17419980	Hmgcl	3-hydroxy-3-methylglutaryl-Coenzyme A lyase	15356	Chr4	+	135.947	135.962	JAX00567750	Chr4	135.577	135.385	137.06	7.73084	9.06683	Cis
17420064	Tcea3	transcription elongation factor A (SII), 3	21401	Chr4	+	136.248	136.275	UNC8295156	Chr4	136.122	135.73	136.326	7.99717	11.1013	Cis
17420462	Kif17	kinesin family member 17	16559	Chr4	+	138.262	138.302	UNC27975760	Chr17	49.3455	48.346	49.4393	7.89284	7.93779	Trans
17420519	Pla2g2c	phospholipase A2, group IIC	18781	Chr4	+	138.725	138.746	UNC8349464	Chr4	140.013	137.892	140.167	7.78296	8.73735	Cis
17420777	Aldh4a1	aldehyde dehydrogenase 4 family, member A1	212647	Chr4	+	139.623	139.649	UNC4149656	Chr2	144.832	144.832	145.115	10.3889	10.5525	Trans
17420874	Padi2	peptidyl arginine deiminase, type II	18600	Chr4	+	140.906	140.951	UNC8362190	Chr4	140.736	140.593	142.563	7.5769	16.0945	Cis
17420911	Atp13a2	ATPase type 13A2	74772	Chr4	+	140.992	141.007	UNC25054276	Chr15	12.583	10.4116	22.3699	7.74259	7.82868	Trans
17420911	Atp13a2	ATPase type 13A2	74772	Chr4	+	140.992	141.007	UNC8366831	Chr4	141.02	140.925	141.191	7.74259	11.3866	Cis
17421006	Arhgef19	Rho guanine nucleotide exchange factor (GEF) 19	213649	Chr4	+	141.24	141.257	UNC8369261	Chr4	141.191	140.925	141.191	8.4974	22.1318	Cis
17421110	Agmat	agmatine ureohydrolase (agmatinase)	75986	Chr4	+	141.747	141.759	UNC8384605	Chr4	142.465	141.067	142.698	7.81096	10.185	Cis
17421704	Masp2	mannan-binding lectin serine peptidase 2	17175	Chr4	+	148.603	148.615	UNC8441220	Chr4	149.905	148.534	149.941	7.73554	9.39383	Cis
17422745	Dvl1	dishevelled segment polarity protein 1	13542	Chr4	+	155.847	155.859	UNC8532156	Chr4	155.787	155.359	156.015	7.87202	7.99946	Cis
17422832	C1qtnf12	C1q and tumor necrosis factor related 12	67389	Chr4	+	155.962	155.967	UNC8535082	Chr4	155.975	155.938	156.139	7.9724	10.5278	Cis
17422914	Noc2l	NOC2 like nucleolar associated transcriptional repressor	57741	Chr4	+	156.236	156.247	UNC8539401	Chr4	156.255	156.255	156.255	7.57728	17.2497	Cis
17423037	Impad1	inositol monophosphatase domain containing 1	242291	Chr4	-	4.76277	4.79335	UNC040386948	Chr4	4.73321	4.4436	5.5381	7.68014	26.5194	Cis
17423215	Ndufaf6	NADH dehydrogenase (ubiquinone) complex I, assembly factor 6	76947	Chr4	-	11.0511	11.0761	UNC6729878	Chr4	10.9683	10.2524	12.6401	7.84988	9.72868	Cis
17423433	Otud6b	OTU domain containing 6B	72201	Chr4	-	14.8106	14.8265	UNC6778138	Chr4	14.7541	14.2978	16.0485	13.1839	15.1399	Cis
17423463	Decr1	2,4-dienoyl CoA reductase 1, mitochondrial	67460	Chr4	-	15.9176	15.9455	UNC6777361	Chr4	14.6972	12.8004	22.3309	7.69369	8.33113	Cis
17423665	Fhl5	four and a half LIM domains 5	57756	Chr4	-	25.1999	25.2428	UNC12027392	Chr6	125.886	125.035	126.362	7.74243	7.97518	Trans
17423701	Fut9	fucosyltransferase 9	14348	Chr4	-	25.612	25.8002	JAX00547070	Chr4	25.9481	25.2379	27.8854	7.46692	22.7876	Cis
17423756	Ankrd6	ankyrin repeat domain 6	140577	Chr4	-	32.8058	32.9235	UNC7019673	Chr4	32.7449	32.0975	33.2683	7.72171	12.2316	Cis
17423915	Mob3b	MOB kinase activator 3B	214944	Chr4	-	34.9519	35.1574	UNC7046794	Chr4	35.0495	34.3725	35.275	7.68705	9.84005	Cis
17424094	Bag1	BCL2-associated athanogene 1	12017	Chr4	-	40.9364	40.9482	UNC040495987	Chr4	41.033	38.0715	41.6458	7.74649	11.7405	Cis
17424243	AI464131	expressed sequence AI464131	329828	Chr4	-	41.4958	41.5031	JAX00118216	Chr4	41.4749	41.421	41.6458	7.6499	19.884	Cis
17424452	Gm2023	predicted gene 2023	100039053	Chr4	-	42.7565	42.7566	UNC041043835	Chr4	42.8802	41.7609	44.5596	7.72495	9.32796	Cis
17424452	Gm2023	predicted gene 2023	100039053	Chr4	-	42.7565	42.7566	UNC3436965	Chr2	82.9948	61.901	84.8417	7.72495	7.95265	Trans
17424633	Arhgef39	Rho guanine nucleotide exchange factor (GEF) 39	230098	Chr4	-	43.4963	43.4997	JAX00549093	Chr4	43.3653	42.8727	45.0052	7.73274	11.0315	Cis
17424742	Gba2	glucosidase beta 2	230101	Chr4	-	43.567	43.5786	UNC040397325	Chr4	44.0169	42.8727	44.7983	7.72952	8.4691	Cis
17424782	Hint2	histidine triad nucleotide binding protein 2	68917	Chr4	-	43.6543	43.6557	UNC7157558	Chr4	45.1042	43.4498	45.4967	7.53091	11.3846	Cis
17424945	Slc25a51	solute carrier family 25, member 51	230125	Chr4	-	45.3962	45.4083	UNC7159117	Chr4	45.1976	45.1042	45.3736	7.50864	18.5532	Cis
17424998	Xpa	xeroderma pigmentosum, complementation group A	22590	Chr4	-	46.1554	46.1963	JAX00549792	Chr4	45.7803	45.4967	46.6262	8.02561	13.787	Cis
17425058	Coro2a	coronin, actin binding protein 2A	107684	Chr4	-	46.5377	46.6022	UNC7180248	Chr4	46.6768	46.5673	46.8825	7.48562	23.8989	Cis
17425202	Acnat2	acyl-coenzyme A amino acid N-acyltransferase 2	209186	Chr4	-	49.3799	49.4081	JAX00118744	Chr4	49.3898	45.1042	52.1195	7.96262	9.98962	Cis
17425221	Baat	bile acid-Coenzyme A: amino acid N-acyltransferase	12012	Chr4	-	49.4896	49.5065	JAX00118744	Chr4	49.3898	49.2184	49.6797	7.70946	21.7871	Cis
17425255	Grin3a	glutamate receptor ionotropic, NMDA3A	242443	Chr4	-	49.6632	49.8453	UNC7228380	Chr4	50.7381	49.5324	52.5517	7.66369	10.5462	Cis
17425770	Ptgr1	prostaglandin reductase 1	67103	Chr4	-	58.9656	58.9871	JAX00119313	Chr4	56.9661	56.7983	59.3706	7.81618	9.1418	Cis
17425870	Slc46a2	solute carrier family 46, member 2	30936	Chr4	-	59.9054	59.915	UNC12378469	Chr7	4.43471	4.32161	7.27882	7.90046	9.6613	Trans
17425888	Mup7	major urinary protein 7	100041658	Chr4	-	60.0704	60.0705	UNC16422252	Chr9	57.1714	51.9943	57.87	7.84224	7.94888	Trans
17425900	Mup2	major urinary protein 2	17841	Chr4	-	60.1407	60.1542	UNC16422252	Chr9	57.1714	52.4832	57.8216	8.56795	8.9031	Trans
17425900	Mup2	major urinary protein 2	17841	Chr4	-	60.1407	60.1542	UNC3731379	Chr2	108.777	108.019	109.009	8.56795	9.50742	Trans
17425941	Mup1	major urinary protein 1	17840	Chr4	-	60.4984	60.4989	UNC16372535	Chr9	52.6458	51.5979	57.5294	8.00451	8.51436	Trans
17426166	Cdc26	cell division cycle 26	66440	Chr4	-	62.3947	62.4086	UNC7351736	Chr4	59.9319	59.8116	62.0343	7.65001	21.8305	Trans
17426198	Hdhd3	haloacid dehalogenase-like hydrolase domain containing 3	72748	Chr4	-	62.499	62.5034	JAX00119615	Chr4	62.4154	59.8116	66.1461	7.84811	9.49444	Cis
17426206	Alad	aminolevulinate, delta-, dehydratase	17025	Chr4	-	62.5092	62.52	UNC7364458	Chr4	63.0693	62.2201	63.5331	8.20802	22.6313	Cis
17426237	Ambp	alpha 1 microglobulin/bikunin	11699	Chr4	-	63.1433	63.1547	UNC7368496	Chr4	63.316	60.0051	64.3021	7.8489	8.86175	Cis
17426348	Tnfsf15	tumor necrosis factor (ligand) superfamily, member 15	326623	Chr4	-	63.7255	63.7451	JAX00552961	Chr4	64.5989	63.0693	68.4884	7.80595	10.1574	Cis
17426631	Dmac1	distal membrane arm assembly complex 1	66928	Chr4	-	75.2774	75.2783	UNC7510716	Chr4	74.759	71.0107	75.8557	7.70364	10.2737	Cis
17426700	Mpdz	multiple PDZ domain protein	17475	Chr4	-	81.279	81.4428	UNC5023962	Chr3	35.0637	32.1373	36.4812	7.55247	8.13953	Trans
17426791	Zdhhc21	zinc finger, DHHC domain containing 21	68268	Chr4	-	82.8028	82.86	JAX00555842	Chr4	82.5508	82.4776	84.2542	7.66805	16.1223	Cis
17426926	Gm12414	predicted gene 12414	102636485	Chr4	-	84.1264	84.1303	UNC7640648	Chr4	84.419	83.5776	84.657	7.71449	8.05327	Cis
17427331	Cyp2j13	cytochrome P450, family 2, subfamily j, polypeptide 13	230459	Chr4	-	96.0277	96.0775	UNC26658522	Chr16	37.4253	36.9472	38.1535	7.81669	8.12483	Trans
17427367	Cyp2j11	cytochrome P450, family 2, subfamily j, polypeptide 11	100066	Chr4	-	96.2946	96.3487	UNC111342185	Chr11	60.7283	60.7283	61.1039	8.51068	10.6379	Trans
17427367	Cyp2j11	cytochrome P450, family 2, subfamily j, polypeptide 11	100066	Chr4	-	96.2946	96.3487	UNC7789049	Chr4	96.5295	96.1359	97.5763	8.51068	15.7112	Cis
17427389	Cyp2j6	cytochrome P450, family 2, subfamily j, polypeptide 6	13110	Chr4	-	96.5168	96.5536	UNC7789664	Chr4	96.5922	95.4399	97.4745	11.8671	20.6658	Cis
[truncated: 1,025 more rows]

## Sheet: Table S6
Table S7: Predicted transcription factro affininty for reference C57BL6/J and othe DO founder for Cst3 gene
SNPID	Chromosome	Position (Bp)	DO founder SNP								Motif ID	Transcription factor	Affinity for reference allele (a1)	Affinity for SNP allele (a2)	P value for a1	P value for a2	% ∇ affinity	Abs (% ∇ affinity)
			C57Bl6/J (reference)	129S1_SvImJ	AJ	CAST_EiJ	NOD_ShiLtJ	NZO_HlLtJ	PWK_PhJ	WSB_EiJ
rs225697750	Chr2	148875444	C	-	-	-	T	-	T	-	MA0325.1	LYS14	1.62 x 10-5	0.0116645	0.286189	<0.01	71903.3	71903.3
rs27261906	Chr2	148876256	C	-	-	T	-	-	-	-	MA0077.1	SOX9	5.50 x 10-5	0.0230509	0.363671	<0.01	41810.8	41810.8
rs244335261	Chr2	148876676	C	-	-	T	-	-	-	T	MA0417.1	YAP5	1.54 x 10-4	0.0573977	0.575588	<0.001	37222.6	37222.6
rs220753689	Chr2	148876083	C	-	-	T	-	-	-	-	MA0356.1	PHO2	0.000553931	0.160647	0.438249	<0.001	28901.3	28901.3
rs236432550	Chr2	148876659	T	-	-	C	-	-	-	C	MA0359.1	RAP1	1.10 x 10-4	0.0282212	0.0652637	<0.01	25513.7	25513.7
rs220753689	Chr2	148876083	C	-	-	T	-	-	-	-	MA0127.1	PEND	4.39 x 10-4	0.0778695	0.126097	<0.01	17619	17619
rs387212829	Chr2	148876444	G	~	~	-	~	-	~	g/a	MA0149.1	EWSR1-FLI1	9.38 x 10-15	1.47 x 10-12	0.0394137	<0.01	15571.6	15571.6
rs27261907	Chr2	148875920	T	-	-	-	-	-	-	G	MA0115.1	NR1H2::RXRA	2.93 x 10-8	3.07 x 10-6	<0.01	<0.001	10377.8	10377.8
rs249229218	Chr2	148876905	T	-	-	C	-	-	-	C	MA0396.1	STP3	4.22 x 10-4	0.037255	0.06549	<0.01	8737.05	8737.05
rs249229218	Chr2	148876905	T	-	-	C	-	-	-	C	MA0397.1	STP4	1.38 x 10-4	0.00975285	0.0768288	<0.001	6984.79	6984.79
rs581036327	Chr2	148876455	G	~	~	A	~	-	~	~	MA0149.1	EWSR1-FLI1	2.74 x 10-13	1.73 x 10-11	0.0142845	<0.01	6213.87	6213.87
rs236432550	Chr2	148876659	T	-	-	C	-	-	-	C	MA0417.1	YAP5	0.00195391	0.0577279	0.26978	<0.001	2854.48	2854.48
rs27261907	Chr2	148875920	T	-	-	-	-	-	-	G	MA0160.1	NR4A2	0.00246425	0.0721775	0.184045	<0.01	2828.98	2828.98
rs220542317	Chr2	148876921	G	-	-	A	-	-	-	A	MA0235.1	onecut	0.00681377	0.146373	0.103829	<0.001	2048.19	2048.19
rs251433896	Chr2	148875547	G	-	-	C*	C*	-	C*	-	MA0155.1	INSM1	0.00307424	0.0298095	0.0422371	<0.01	869.655	869.655
rs27261908	Chr2	148875297	C	-	-	-	-	-	-	T	MA0185.1	Deaf1	0.016364	0.109936	0.227091	<0.01	571.818	571.818
rs27261908	Chr2	148875297	C	-	-	-	-	-	-	T	MA0243.1	sd	0.0405376	0.233572	0.0718322	<0.01	476.185	476.185
rs220753689	Chr2	148876083	C	-	-	T	-	-	-	-	MA0124.1	NKX3-1	0.00342159	0.0160693	0.0371509	<0.01	369.644	369.644
rs244335261	Chr2	148876676	C	-	-	T	-	-	-	T	MA0033.1	FOXL1	0.0376831	0.159691	0.095661	<0.01	323.772	323.772
rs233678187	Chr2	148876775	G	-	-	-	-	-	-	A	MA0033.1	FOXL1	0.0919908	0.374401	0.0317017	<0.001	306.999	306.999
rs27261909	Chr2	148875196	G	-	-	g/a	-	-	-	-	MA0007.1	Ar	0.000685052	0.00233043	0.0163942	<0.01	240.182	240.182
rs387212829	Chr2	148876444	G	~	~	-	~	-	~	g/a	MA0205.1	Trl	0.0648432	0.190092	0.0179795	<0.01	193.157	193.157
rs225599389	Chr2	148876280	G	-	-	T	T	-	T	T	MA0384.1	SNT2	1.03 x 10-5	1.05 x 10-10	<0.01	0.136342	-99.999	99.999
rs251433896	Chr2	148875547	G	-	-	C*	C*	-	C*	-	MA0139.1	CTCF	3.08 x 10-4	1.87 x 10-8	<0.01	0.195324	-99.9939	99.9939
rs27261910	Chr2	148875149	G	-	-	A	-	-	-	-	MA0310.1	HAC1	0.172612	2.86 x 10-4	<0.01	0.0819141	-99.8343	99.8343
rs236432550	Chr2	148876659	T	-	-	C	-	-	-	C	MA0083.1	SRF	1.62 x 10-5	6.79 x 10-8	<0.01	0.0985108	-99.5809	99.5809
rs240608291	Chr2	148877061	T	-	-	C	-	-	-	C	MA0037.1	GATA3	0.104013	0.000517923	<0.01	0.706838	-99.5021	99.5021
rs263777023	Chr2	148876967	G	-	-	A	-	-	-	A	MA0037.1	GATA3	0.10461	0.000748309	<0.01	0.641337	-99.2847	99.2847
rs251433896	Chr2	148875547	G	-	-	C*	C*	-	C*	-	MA0116.1	Zfp423	0.0757299	0.00068095	<0.01	0.0379857	-99.1008	99.1008
rs387212829	Chr2	148876444	G	~	~	-	~	-	~	g/a	MA0342.1	MSN4	0.0679381	0.000818626	<0.01	0.545215	-98.795	98.795
rs583038412	Chr2	148876442	G	~	~	A	~	-	~	-	MA0342.1	MSN4	0.067929	0.000889927	<0.01	0.534799	-98.6899	98.6899
rs227586379	Chr2	148876906	G	-	-	A	-	-	-	A	MA0454.1	odd	0.0105325	2.43 x 10-4	<0.01	0.123604	-97.6948	97.6948
rs225697750	Chr2	148875444	C	-	-	-	T	-	T	-	MA0111.1	Spz1	0.0263109	0.000799497	<0.01	0.162246	-96.9614	96.9614
rs263777023	Chr2	148876967	G	-	-	A	-	-	-	A	MA0265.1	ABF1	0.0131766	4.98 x 10-4	<0.01	0.0560641	-96.2237	96.2237
rs244335261	Chr2	148876676	C	-	-	T	-	-	-	T	MA0382.1	SKO1	1.03 x 10-5	4.52 x 10-7	<0.01	0.0247103	-95.6117	95.6117
rs387212829	Chr2	148876444	G	~	~	-	~	-	~	g/a	MA0057.1	MZF1(var.2)	0.37294	0.033769	<0.001	0.0501583	-90.9452	90.9452
rs249239589	Chr2	148875443	A	-	-	C	C	-	C	C	MA0111.1	Spz1	0.0263109	0.00239276	<0.01	0.0674565	-90.9058	90.9058
rs27261908	Chr2	148875297	C	-	-	-	-	-	-	T	MA0401.1	SWI4	0.00578576	0.000526323	<0.01	0.0173854	-90.9031	90.9031
rs583038412	Chr2	148876442	G	~	~	A	~	-	~	-	MA0057.1	MZF1(var.2)	0.364689	0.0353072	<0.001	0.0474031	-90.3185	90.3185
rs236432550	Chr2	148876659	T	-	-	C	-	-	-	C	MA0210.1	ara	0.0619508	0.117184	0.0313941	<0.01	89.1564	89.1564
rs249229218	Chr2	148876905	T	-	-	C	-	-	-	C	MA0454.1	odd	0.0105325	0.00198711	<0.01	0.0323065	-81.1335	81.1335
rs247222675	Chr2	148875445	T	-	-	t/a	-	-	-	-	MA0111.1	Spz1	0.026309	0.00560744	<0.01	0.0345308	-78.6862	78.6862
rs263777023	Chr2	148876967	G	-	-	A	-	-	-	A	MA0306.1	GIS1	0.0620667	0.109974	<0.01	<0.001	77.1877	77.1877
rs27261907	Chr2	148875920	T	-	-	-	-	-	-	G	MA0064.1	PBF	0.0304114	0.00717844	<0.001	0.330792	-76.3956	76.3956
rs220753689	Chr2	148876083	C	-	-	T	-	-	-	-	MA0197.1	Oct	0.0798106	0.0279508	<0.01	0.0255223	-64.9787	64.9787
rs220753689	Chr2	148876083	C	-	-	T	-	-	-	-	MA0232.1	lbl	0.0809121	0.0368983	<0.01	0.0172857	-54.397	54.397
rs581613532	Chr2	148876427	G	-	~	-	T	-	t	-	MA0056.1	MZF1	0.104488	0.0547298	<0.01	0.0321711	-47.6208	47.6208
rs581613532	Chr2	148876427	G	-	~	-	T	-	t	-	MA0057.1	MZF1(var.2)	0.703907	0.544903	<0.001	<0.001	-22.5887	22.5887
rs581613532	Chr2	148876427	G	-	~	-	T	-	t	-	MA0431.1	YML081W	0.175059	0.214144	<0.01	<0.001	22.3265	22.3265
rs220542317	Chr2	148876921	G	-	-	A	-	-	-	A	MA0176.1	CG15696	0.183911	0.222571	<0.001	<0.001	21.0213	21.0213
aTranscription factros having 20% or more absulate differences in the affinity between reference and SNP alllele are showing in this table
bP-values <0.05 for a TF matrix indicates that the sequence has significantly more TF binding affinity than we could expect from a random sequence

## Sheet: Table S7
Table S7: Prediction of the SNP and indel polymorphism on the protein function using POVEN
DO founder strains	PROVEN prediction of SNP variant		PROVEN prediction of indel variant
	Neutral	Deleterious	Neutral	Deleterious
129*	--	--	--	--
AJ	0	0	0	0
CAST	3	0	0	0
NOD	0	0	0	0
NOZ	0	0	0	0
PWK	0	0	0	0
WSB	1	0	0	0
*B6 and 129 have very same Cst3 genetic architechture

## Sheet: Table S8
Table S8: Module gene member number and percent variance explained by the module eigengenes (MEs)
Module	No. of genes	Percent variance explained by ME
Orange	21	0.357083
Darkgrey	22	0.340393
Darkturquoise	26	0.339336
Darkgreen	33	0.326654
Darkred	35	0.299782
Royalblue	37	0.390293
Lightyellow	52	0.277617
Lightgreen	55	0.283088
Grey60	57	0.314885
Lightcyan	58	0.312889
Midnightblue	81	0.260472
Cyan	96	0.257097
Salmon	109	0.259378
Tan	121	0.253713
Greenyellow	138	0.206666
Purple	160	0.214627
Magenta	173	0.280486
Pink	191	0.212666
Black	192	0.219803
Red	195	0.233238
Green	197	0.210133
Yellow	243	0.228758
Brown	323	0.219039
Blue	623	0.211641
Turquoise	928	0.247965
Unassigned	3879	0.0364141

## Sheet: Table S9
Table S9: Significant GO term enrichment of module gene members
Module name	Term	P-value	Adjusted P-value	Odds ratio	Combined score
Black	Fatty acid beta-oxidation using acyl-coa oxidase (GO:0033540)	1.0 x 10-5	0.0263902	27.7778	318.867
Blue	rRNA transport (GO:0051029)	5.4 x 10-4	0.195845	16.2866	122.621
Brown	Type I interferon signaling pathway (GO:0060337)	6.2 x 10-9	1.1 x 10-5	10.5769	199.982
Cyan	Negative regulation of cellular protein catabolic process (GO:1903363)	1.0 x 10-3	1	41.6667	287.797
Darkgreen	Regulation of fatty acid oxidation (GO:0046320)	4.3 x 10-9	2.2 x 10-5	186.48	3590.59
Darkgrey	Ubiquinone biosynthetic process (GO:0006744)	1.2 x 10-4	0.0766915	121.212	1094.07
Darkred	SRP-dependent cotranslational protein targeting to membrane (GO:0006614)	1.7 x 10-5	0.0176173	25.6822	281.657
Darkturquoise	Mitochondrial translation (GO:0032543)	2.4 x 10-7	1.2 x 10-3	35.9454	547.916
Green	Calcium ion import into cytosol (GO:1902656)	2.6 x 10-3	0.866754	25.641	153.142
Greenyellow	Response to unfolded protein (GO:0006986)	1.3 x 10-11	3.2 x 10-8	30.3337	761.332
Grey60	Negative regulation of platelet-derived growth factor receptor-beta signaling pathway (GO:2000587)	7.6 x 10-7	7.8 x 10-4	150.376	2118.41
Lightcyan	Monovalent inorganic cation homeostasis (GO:0055067)	1.1 x 10-8	1.8 x 10-5	66.313	1216.47
Lightgreen	Golgi to vacuole transport (GO:0006896)	6.6 x 10-4	0.675145	51.9481	380.31
Lightyellow	DNA dealkylation involved in DNA repair (GO:0006307)	2.9 x 10-4	1	76.9231	625.428
Magenta	mRNA 3'-splice site recognition (GO:0000389)	1.1 x 10-3	1	38.5356	262.85
Midnightblue	Mitochondrial ATP synthesis coupled electron transport (GO:0042775)	4.7 x 10-11	2.4 x 10-7	26.8057	637.282
Orange	Respiratory electron transport chain (GO:0022904)	4.7 x 10-10	1.2 x 10-6	60.7903	1305.68
Pink	Endoplasmic reticulum tubular network organization (GO:0071786)	5.4 x 10-6	2.3 x 10-3	32.2191	390.865
Purple	Monoubiquitinated protein deubiquitination (GO:0035520)	9.3 x 10-4	0.280395	41.6667	290.664
Red	Regulation of protein deubiquitination (GO:0090085)	3.1 x 10-5	0.0263962	43.956	456.279
Royalblue	Cytoskeletal anchoring at nuclear membrane (GO:0090286)	4.0 x 10-3	1	250	1380.76
Salmon	Alternative mrna splicing, via spliceosome (GO:0000380)	3.2 x 10-9	3.2 x 10-6	77.1605	1508.94
Tan	Fatty-acyl-coa metabolic process (GO:0035337)	1.1 x 10-9	2.8 x 10-6	52.1966	1076.67
Turquoise	Ether lipid metabolic process (GO:0046485)	7.2 x 10-7	7.4 x 10-4	14.3988	203.615
Yellow	Photoperiodism (GO:0009648)	1.4 x 10-7	7.2 x 10-4	23.5156	370.97

## Sheet: Table S10
Table S10: Significant KEEG pathway enrichment of module gene members
Module name	Term	P-value	Adjusted P-value	Odds ratio	Combined score
Black	Fatty acid degradation	4.7 x 10-7	1.4 x 10-4	14.5833	212.348
Blue	Adherens junction	6.7 x 10-5	0.0202322	4.52407	43.4954
Brown	Influenza A	3.3 x 10-6	9.8 x 10-4	4.83631	61.1202
Cyan	Glyoxylate and dicarboxylate metabolism	9.7 x 10-3	0.978128	13.4409	62.3284
Darkgreen	Fatty acid degradation	1.8 x 10-8	2.7 x 10-6	60.6061	1081.13
Darkgrey	Oxidative phosphorylation	3.0 x 10-7	9.1 x 10-5	33.9213	509.371
Darkred	Ribosome	2.1 x 10-4	0.0650748	13.4454	113.559
Darkturquoise	Huntington disease	4.3 x 10-6	1.3 x 10-3	20.0321	247.435
Green	Endocrine and other factor-regulated calcium reabsorption	2.0 x 10-4	0.0148513	9.32401	79.6
Greenyellow	Protein processing in endoplasmic reticulum	2.6 x10-14	7.7 x 10-12	14.226	445.268
Grey60	Focal adhesion	2.1 x 10-5	6.5 x 10-3	10.5792	113.745
Lightcyan	Collecting duct acid secretion	1.3 x 10-8	4.0 x 10-6	63.857	1158.47
Lightgreen	Sulfur metabolism	0.0244842	1	40.404	149.888
Lightyellow	Proximal tubule bicarbonate reclamation	1.5 x 10-3	0.224432	34.965	227.789
Magenta	Spliceosome	1.0 x 10-3	0.310136	5.25486	36.177
Midnightblue	Steroid biosynthesis	5.4 x 10-5	2.1 x 10-3	39.9734	392.129
Orange	Oxidative phosphorylation	5.6 x 10-15	1.7 x 10-12	63.9659	2098.13
Pink	Parkinson disease	1.4 x 10-8	4.3 x 10-6	8.726	157.765
Purple	Mismatch repair	0.0132279	0.80161	11.3636	49.1526
Red	Arginine and proline metabolism	5.2 x 10-7	1.6 x 10-4	14.359	207.58
Royalblue	Vasopressin-regulated water reabsorption	0.0212978	1	46.5116	179.03
Salmon	Spliceosome	4.1 x 10-8	1.2 x 10-5	12.6263	214.871
Tan	Fatty acid elongation	7.9 x 10-7	8.0 x 10-5	28.4981	400.488
Turquoise	Bile secretion	3.2 x 10-9	9.6 x 10-7	5.39957	105.689
Yellow	Circadian rhythm	1.4 x 10-6	4.3 x 10-4	16.4609	221.801

[truncated: 3 more sheets: Table S11, Table S12, Table S13]
